# Supplementary material for: Growing Maize Root: Lectins Involved in Consecutive Stages of Cell Development
Source: Plants (Basel). 2022 Jul 7;11(14):1799. doi: 10.3390/plants11141799 (PMC9319948; doi:10.3390/plants11141799)
Supplement: Supplementary file 1 [file plants-11-01799-s001.zip › Table_S1.xlsx]

## Sheet: All genes
Table S1. List of genes encoding proteins with lectin domains in Z. mays.
			Gene expression (TGR* value)
Gene id	Family	Clusters	Cap	Mer	eElong	Elong	lateElong	Domain organization*	Predicted localization (LocTree3)	Predicted localization (DeepLoc)	Signal peptide	TM*	Homologs (gene id)	Homologs (other name)	Coexpression	Fasta sequence*
Zm00001d004342	Amaranthin		0	9.77923	1.08209	1.82692	12.229	Agglutinin + Aerolysin	Extracellular	Cytoplasm	-	-	N/A			MAHLISSAIAGAGNLVADGISGVTGVASQVVEGVEDTLGSIVEAIDQGVKDEDQLDLPKYVCFKGDNGLYLSARTVEGHPYLQFASEDIGDPSVRFITYNHKVNGKRVVRFKSNHLGKFWRRSPNWIWADTDDTSTKNSDTLFEVIKIDEDGVYALRNLGNNHFCHRLTYDGKESCLNATIPTIRKEAHIKIEEAVLSRKISNIEYHLKGAKIFDKKAKTLITREAVNGTSTDSKTTITLKYSVIKGKLWDSSKSMKLGVTTTIEAGVPVVLPATIEVQSEFNSTYSWGESIIEKEEYSNAYEVVVPAYSVVTVSVLATQGICQVPFSYTQEDVLTTGERKVFKFDDGIFRGVNSFGFKSEVTERKLSKDDD
Zm00001d004344	Amaranthin		0	6.72322	0.535012	0.913462	8.91155	Agglutinin + Aerolysin	Extracellular	Cytoplasm	-	-	N/A			MLIIYKYAERPHKRPPQKQNAENGTTTKVDEPKELPKHVCFKGDNGLYLSARMVEGYPYLQFASDDIGDPSVRFTTYNYMIDGKRVIRVKSDHFGKFWRRSPNWIWCDTDDTSTDNRDTLFEVVRVGDDADAVYGLRNLGNNHICHRLTYEGKESCLNASIPSVRKEAQLKIEEAVLLRKIYGVDYHLKDAKILNNKVRTLVTREAVNAGSMPSKNTLTLKYVVSNGKIWDASRSLRLGIKSSFQAGVPEVVTGSITLESEFDTSYIWGENTVNTEEFSTDYEVIVPPHTVITVRILATQGTCQVPFSYTQEDILTTGEKKVTKYDDGIFRGVNSFGFKSEVTERKINGE
Zm00001d004346	Amaranthin		0	7.13069	0.535012	0.913462	8.74709	Agglutinin + Aerolysin	Extracellular	Cytoplasm	-	-	N/A			MARLVSSGIIGKGHNIFDDGGFGEVHADPIKVERPHKRPPQKQNAENGTTTKVDEPKELPKHVCFKGDNGLYLSARMVEGYPYLQFASDDIGDPSVRFTTYNYMIDGKRVIRVKSDHFGKFWRRSPNWIWCDTDDTSTDNRDTLFEVVRVGDDADAVYGLRNLGNNHICHRLTYEGKESCLNASIPSVRKEAQLKIEEAVLLRKIYGVDYHLKDAKILNNKVRTLVTREAVNAGSMPSKNTLTLKYVVSNGKIWDASRSLRLGIKSSFQAGVPEVVTGSITLESEFDTSYIWGENTVNTEEFSTDYEVIVPPHTVITVRILATQGTCQVPFSYTQEDILTTGEKKVTKYDDGIFRGVNSFGFKSEVTERKINGE
Zm00001d004348	Amaranthin		0	3.66721	0.802518	1.59856	8.36741	Agglutinin + Aerolysin	Extracellular	Cytoplasm	-	-	N/A			MAHLISSAIAGAGNLVADGISGVTGVASQVVEGVEDTLGSIVEAIDQGVKDEDQLDLPKYVCFKGDNGLYLSARKVEGHPYLQFASGDIGDPSVRFITYNHKVNGKRVVRFKSNHLGKFWRRSPNWIWADTDDTSTNNSDTLFELIKIGEDGVYALRNLGNNYFCHRLTYEGKEDCLNAMIPTIRKEAYLKIEEAVLSRKISNIEYHLKGAKIFDKKAKTLITREAVNGTSTDSKTTITLKYSVIKGKLWDSSKSMKLGVTTTIEAGVPVVLPATIEVQSEFNSTYSWGESIIEKEEYSNAYEVVVPAYSVVTVSVLATQGICQVPFSYTQEDVLTTGERKVFKFDDGIFRGVNSFGFKSEVTERKLSKDDD
Zm00001d003857	Calreticulin	2	12625.3	20598.7	30997.4	19097.1	5488.16	Calreticulin	ER	ER	+	+	AT5G61790, AT5G07340	CNX1, CNX2		MGGRALLLLLLVSALVFQIHASDPLLYEPFDEDFEGRWVVSKKDEYQGVWRHAKSDGHEDYGLLVSEKARKYAIIKELDEPVTLKDGTVVLQFEVRLQNGLECGGAYIKYIRPQDAGWDAKEFDNETPYTIMFGPDKCGSTNKVHFILKHKNPKTGKYVEHHLKFPPSVPYDKLSHVYTAILKPDNEVKILVDGEEKKKANFLSADDFEPALIPSKTIPDPDDKKPEDWDERAKIPDPDAVKPDDWDEDAPMEIVDDEATKPEGWLDDEPEEIDDPEAAKPEDWDDEEDGEWEAPKIDNPKCEEAPGCGEWKRPMKQNPAYKGKWHAPMIDNPNYKGIWKPQEIPNPEYFELDKPDFDPIAAIGIEIWTMQDGILFDNILIADDEKVATSILEKTWKPK…
Zm00001d005460	Calreticulin	2	3190.17	6521.5	8847.37	3301.38	944.282	Calreticulin	ER	ER	+	-	AT1G56340, AT1G09210	CRT1/2		MVIRRGSSYAVAALLALASVAAVAGEVFFQEKFEDGWESRWVKSEWKKDDNMAGEWNHTSGKWNGDAEDKGIQTSEDYRFYAISAEYPEFSNKDKTLVLQFSVKHEQKLDCGGGYVKLLGGDVDQKKFGGDTTYSIMFGPDICGYSTKKVHTILTKDGKNHLIKKDVPCETDQLTHVYTLIIRPDATYSILIDNEEKQTGSIYEHWDILPPKQIKDPEAKKPEDWDDKEYIPDPEDKKPEGYDDIPKEIPDPDAKKPEDWDDEEDGEWTAPTIPNPEYKGPWKQKKIKNPNYQGKWKAPMIDNPDFKDDPYIYAFDSLKYIGIELWQVKSGTLFDNIIITDDPALAKTFAEETWGKHKEAEKTAFDEAEKKKEEEEAAKGGDDDDDDLEDEADDDKADD…
Zm00001d012170	Calreticulin	4	1636.29	1723.09	2683.73	3412.7	3108.76	Calreticulin	ER	ER	+	-	AT1G08450	CRT3		MGTGRRGGGGGGVFHRLLALSSLLLLASGEVVFEERFEDGWETRWVESDWKRSEGKAGRFKHTAGRYSADPDDKGIQTTIDARHFAISAKFPEFSNKNRTLVVQYSIKFEQDIECGGGYIKLMSGYVNQKKFSGDTPYSLMFGPDICGTQTKKLHLILSYQGQNYPIKKDLECETDKLTHVYTFILRPDASYSLLVDNRERESGSMYTDWDILPPRKIKDVHAKRPKDWDDREYIEDPDEVKPEGYDSIPKQIPDPKDKKPDTWDEDEDGIWKPRMVSNPAYKGPWKRKRIKNPNYKGKWKTPWIDNPEFEDDPDLYVLKPLKYIGIEVWQVKAGSVFDNILICDDPEYARKVVEETWGANREAEKEAFEEAEKERKAREDREGQKAKDDGGRHRIHRR…
Zm00001d014877	Calreticulin							Calreticulin	ER	Cytoplasm	-	-				MAADHRTEAQSRGPPTLSSPLSLSGEPPQPRASAGIGAATGSKHGEKGKKRGRKSAAVYVGDGKNIVHSWLHFVCACPKEFEPNANTVEIARVAGIGKIEIKTIPEKQLREHTLCTQMFGPAWDKRKKLVIESRSFMDSRCKLTSSMSTGIFFPPKQIKDPETKKPEDWEDKEYIPDPEDKKPEGYDGIPKEITDPDAKKPEDRDNEEDGEWTTHLLVPFPTKIQGTMETK
Zm00001d019283	Calreticulin	2	19304.7	30606.3	41660.1	21781.6	6698.69	Calreticulin	ER	ER	+	-	AT1G56340, AT1G09210	CRT1/2		MAIRKGSSYAVAALLALASVAAVAGEVFFQEKFEDGWESRWVKSEWKKDENMAGEWNHTSGKWNGDAEDKGIQTSEDYRFYAISAEYPEFSNKDKTLVLQFSVKHEQKLDCGGGYVKLLGGGDVDQKKFGGDTSYSIMFGPDICGYSTKKVHTILTKDGKNHLIKKDVPCETDQLTHVYTLIIRPDATYSILIDNEDKQTGSIYEHWDILPPKKIKDPEAKKPEDWDDKEYIPDPEDKKPEGYDDIPKEIPDPDAKKPEDWDDEEDGEWTAPTIPNPEYKGPWKQKKIKNPNYQGKWKAPMIDNPDFKDDPYIYAFDSLKYIGIELWQVKSGTLFDNIIITDDPALAKTFAEETWGKHKEAEKAAFDEAEKKKEEEDAAKGGDDEDDDLEDEEDDEKAD…
Zm00001d019548	Calreticulin							Calreticulin	ER	Cytoplasm	-	-				MQTDIIYEHWDILPPKQIKDPETKKPEDWDDKEYIPDPEDKKPEGYDGIPKEITDPDAKKPEDRDNEEDGEWTTHLLVPFPTKIQGTMETKRLNEALCLTTPSSLMILRWPRLLQRRHGASTRRYCVLMLGVKMVATL
Zm00001d025305	Calreticulin	2	9543.26	17954	25638.7	10487.6	3021.03	Calreticulin	ER	ER	+	+	AT5G61790, AT5G07340	CNX1, CNX2		MMGGRALLLLLVSALLVQIRASDPLLYEPFDEDFEGRWIVSKKDEYQGVWKHAKSDGHEDYGLLVSDKARKYAIIKELDEPVTLNDGTVVLQFEVRLQNGLECGGAYIKYIRPQDAGWDAKEFDNETPYTIMFGPDKCGSTNKVHFILKHKNPKTGKYVEHHLKFPPSVPYDKLSHVYTAILKPDNEVRILIDGEEKKKANFLSADDFEPALIPSKTIPDPDDKKPEDWDERAKIPDPDAVKPDDWDEDAPMEIVDEEATKPEGWLDDEPEEIDDPEAAKPEDWDDEEDGEWEAPKIDNPKCEEAPGCGEWKRPMKQNPAYKGKWHAPMIDNPNYKGIWKPQEIPNPEYFELDRPDFDPIAAIGIEIWTMQDGILFDNILIADDEKVATSILEKTWKPK…
Zm00001d035252	Calreticulin							Calreticulin	ER	Cytoplasm	-	-	AT1G56340, AT1G09210	CRT1/2		MGVPHHPTGNLNRITHMKSSIEFYCTVVMAMWLGKSFSMKHEQKLDHGGDYVKLHYICGYITKKVHTILTKDGKNHLIKKDVPCETDQLTHVYTLIICPDATYFSLIMKRCKMTTSMSTGIFSPPPKQIKDPEAKKGYDDIPKEIRDPDANKPEDWDNEGDDFKDDPYIYAFDSLKYIGIEMWQIGVG
Zm00001d038648	Calreticulin	4	1985.81	1911.89	3036.87	4521.81	7938.1	Calreticulin	ER	ER	+	-	AT1G08450	CRT3		MGRLRDGRAFLHRALVLSSLLLLASGEIFFEERFDDGWDSRWVKSDWKKSQGQAGTFRHTAGTYSGDPDDKGIQTTGDAKHFAISAKFPQFSNKDRTLVIQYSLKIEQDIECGGAYIKLMSGYLNQKKFGGDTPYSFMFGPDICGDQKKKLHLILSYQGQNYPIKKELKCETDKLTHFYTFILRPDATYSILIDNREREFGSMYTDWDILPPRKIKDVNAKKPKDWDDREYIEDPDQVKPEGYDSIPKEIPDPKDKKPESWDDDDDGTWKPRMIPNPEYKGPWKRKKIKNPNYKGKWKTPWIVNPGERHISDLLLFTYCHVDYVYCLLMTVLSISLGKFEDDPDLYVLKPLQYVGIEVWQVKAGSVFDNILICDDPDYARHVVDETFAANKEAEKEAFE…
Zm00001d046447	Calreticulin							Calreticulin	ER	Cytoplasm	-	-				MLMNRCKLTSSMSTGIFFPPKQIKDPETKKPENWEDKEYIPDPEDKKPEGYDGIPKEITDPDAKKVFMWLFVM
Zm00001d046894	Calreticulin	2	20.736	17.8054	19.2901	19.6708	14.1614	Calreticulin	ER	Cytoplasm	-	-				MAVMEKLKIFAASCLIAGFRIGIFFPPKQIKDPEAKKPKDWDGKEYIPDPADKKPEGYDGIPKEIPDPDAKKPEDRDNEEDGEWTTHLPVSFPTKIQGTMETKRSTNRDKIILHVVSWFTGEAAQHEESEVMDGEDDDDEDDDDEDDDDYDTKKNKGTAGGEGQQGKRPTECKQQ
Zm00001d040192	C-type	1	1010.73	570.606	335.382	283.415	629.446	Lectin_C + PK	Plasma membrane	Plasma membrane	+	+	N/A			MAAPALAFPMLLAASLLSVAAPALARSPSCPDGWQGGPVQNRCFMYISASLSWDRSEAVCHNYSGHLAAVSSVQELNFVKSLCGSSSTGCWVGGHHYSTSTGNGWKWSDDSSVWNETVFLGEPLPANCSDPACKVATSNDFCTLVTNGQPSTITEKRCSESHGLICRMNHVDRCYHDHCHKEYFISIIAVSGFILATTLAVVVWLLVYRRSKKRRRSREVLSASAAALVAPQWKVFTSEELRSITKNFSEGNRLPGNAKTGGTYSGILPDGSKVAIKRLKRSSLQRKKDFYSEIRRVAKLYHPNLVAVKGCCYDHGDRFIVYEFVANGPLDVWLHHIPRGGRSLDWAMRMRAATTLAQGIAFLHDKVKPQVVHRDIRASNVLLDEDFGSHLMGVGLSKF…
Zm00001d007187	EUL	5	385.262	160.279	68.0291	219.575	1123.9	Ricin B-like + Ricin B-like	Nucleus	Cytoplasm or Extracellular	-	-	LOC_Os07g48460	OsEULD2		MFGHHHHHGHGGHHQAPPPHEQTLFRIFCRADEAYCLTVRHDAVVLAPTNPRDEYQHWYKDMRHSTKVKDAEGQPAFALINRATGLAIKHSLGQSHPVKLVPYNAEYLDESVLWTESHDVGKGFRCIRMVNNIHLNFDAFHGDKDHGGVHDGTTVVLWEWCKGPNQSWKVLPWGDEAYAPRPYAPPPPAQVEPGYGGYRPPAAGGYAPPPPPAQVEPGYGGYPPPPAAGGYAPPPPPAQVEPGYGGYPPPPAAGGYAPPPPPVPVQEPGYGGYRPPSAGGYPAGYGYSNLPRALASEQTVRVYCKAGEGYSLTVRNGTVCLAPTNPRDEFQHWVKDMRHSTSIKDEEGYPAFALVNKVTGEAIKHSLGQSHPVRLVPYNPEYVDESVLWTESRDVGHGF…
Zm00001d022420	EUL	5	21.2226	22.487	13.5333	66.9638	519.959	Ricin B-like	Extracellular	Extracellular	-	-	LOC_Os07g48500	OsEULS2		MDGGYYGGRDQRYSGGYYGGGGIATPGYAPAVPYGMSQVNIEGNGCGRALPPQPTVKVYCRANPNYAMSVRDGKVVLAPANPKDEYQHWIKDMRWSTSIKDEEGYPAFALVNKATGEAIKHSLGQSHPVRLVPYNPDFLDESVLWTESRDVGNGFRCVRMVNNIYLNFDALHGDKWHGGVRDGTDVVLWKWCEGDNQRWKIQPYY
Zm00001d022421	EUL	1	13268	15199.6	4837.37	5270.81	15760.8	Ricin B-like + Ricin B-like	Extracellular	Extracellular or Cytoplasm	-	-	LOC_Os07g48490	OsEULD1a		MSWFGHHHHNQPAPPASGPNQVFKIFCRANENYCLAVRDGAVVLAPVNPKDDHQHWYKDMRFSTRVKDEEGMPAFALVNKATGLAIKHSLGQSHPVKLAPFSPDQEDASVLWTESKDVGKGFRCIRMVNNTRLNFDAFHGDKDHGGVHDGTAVVLWEWCKGENQSWKILPWGPEANSSAAHAGGPHAVRVFCKAGGEDYSLTVRNGTACLAPTNPRDEYQHWVKDMRHSTRVRDEEGYPAFALVNKVTGEALKHSTGQGHPVKLVPYNPDYQDESVLWTESRDVGNGFRCVRMVNNIYLNFDAFHGDKAHGGVHDGTEIVLWKWCEGDNQRWKILPWCKSTTHCAFAERTKETTSWYPNNNSAGCGDPKIKEAGCDASRTSRVVFASDSQPLWG
Zm00001d022516	EUL	5	7.6443	10.9958	4.69687	28.0059	274.531	Ricin B-like	Extracellular	Extracellular	-	-	LOC_Os07g48500	OsEULS2		MHHQWGSWGRREQPAAPYKSAGPAVALSASGPLDHQSPEELLIEVSEVEKQAANKGTIVMDGGYYGGRDQRYSGGYYGGGGIATPGYAPAVPYGMSQVNIEGNGCGRALPPQPTVKVYCRANPNYAMSVRDGKVVLAPANPKDEYQHWIKDMRWSTSIKDEEGYPAFALVNKATGEAIKHSLGQSHPVRLVPYNPDFLDESVLWTESRDVGNGFRCVRMVNNIYLNFDALHGDKWHGGVRDGTNVVLWKWCEGDNQRWKIQPYY
Zm00001d024981	EUL	1	90.7993	82.99	26.83	0.843453	0.312989	Ricin B-like	Cytoplasm	Cytoplasm	-	-	AT2G39050	ArathEULS3		MYMQQWFKDYSRSSNLTDDNGRRTFALVNKATRQAIVNRKDTSMQSDLQYRRGDVIKQVELAPYNYDDRVDISMLWTELAENGNDDGFNIIAVLSDNSLMLCWQHDGNNVSTGQGMVTVNYFSGQGNRHWKIVPVGRNAW
Zm00001d024982	EUL	1	1648.26	704.39	177.902	20.999	0.657857	Ricin B-like	Extracellular	Cytoplasm	-	-	AT2G39050	ArathEULS3		MAQSVKILCKDGFNLYVTIRGNKAVLAPEDPDDEMQEWFKDYSRVSSVTDDNGQRVFALVNKETQQAMVNRRDEQEVQLVPYYKDDDRVDISMLWTELPEDHGDGFHQIAALKNTYEALDGLGGNCKEGTIVGIDPTHYSYLGTVNKNQLWKIVDKGTARRLTKELGLGGARLKKLAPISLRN
Zm00001d028998	EUL	1	14636.4	7917.28	2055.69	2580.85	6145.73	Ricin B-like + Ricin B-like	Extracellular	Cytoplasm or Extracellular	-	-	LOC_Os03g21040	OsEULD1b		MFGFGHHGQNPPAHGGVHQPTFKIFCKSDEGYCLTVRDGNVVLAPANPRDEHQHWYKDMRFSTQVKDEEGNPAFALVNKATGLAIKHSLGQSHPVKLVPFNPEYQDESVLWTESGDVGKGFRCIRMVNNIRLNFDAFHGDKGHGGVHDGTTVVLWEWAKGDNQSWKILPWGDEAYAAGGSSAANAPRFGGGGEPTVRIYCKADEGFSATVRNGAVCLAPTNPRDEYQHWIKDMRHSNSVKDEEGYPAFALVNRVTGEAIKHSQGEGHPVKLVPYNPGYQDESVLWTESRDVGHGFRCVRMVNNIYLNFDAFHGDKDHGGVRDGTNIVLWKWCEGDNQRWKIVPWCKSRLSTHPGHFSRILFLE
Zm00001d040190	EUL	3	1653.29	4017.81	10050.4	13790.3	12100.4	Ricin B-like	Extracellular	Cytoplasm or Nucleus	-	-	LOC_Os01g01450	OsEULS3		MEFPHHHHHHGHRRDDDEDDRRGPPPPVYGGYGQPPPPDPYGRAPVDPDPYGRPPPQSAYGGAGDAYGHSGQGYAPPPAYGAGGGYGNVVHVAHEVGDERPYYGGGGGGLGGAYGGGGSEYGHEGRPHHGGGGSQYGHETRPHHGGGGGAPPVRQQTYRIYCKAGEDQYSLASRDGKVCLVRTDRDDDAQHWIKDMKYSTRVKDEEGYPAIVLVNKATGEALKHSLGQSHPVLLTRHNPDSLDESVLWTESRDVGDGFRCIRMVNNIYLNFDALHGDKDHGGVRDGTALVLWEWCEGDNQRWKIVPW
Zm00001d006243	Galactose-binding	5	75.803	40.4802	54.8174	59.6578	62.7763	GH35 + Gal_lectin	Extracellular	Extracellular	+	-	At4g35010, At2g16730, At4g38590¹	AtBGAL11, AtBGAL13, AtBGAL14¹		MTVRAAAVLVATAALALLLPGWAAAEWSLTKKGSVVTYDGRSLMIDGKRDLFFSGAIHYPRSPPEMWPKLIERAKEGGLNTIETYIFWNAHEPEPGKYNFEGRFDLIKYLKMIQEHDMYAIVRIGPFIQAEWNHGGLPYWLREIDHIIFRANNDPYKKEMEKFVRFIVQKLKDAELFASQGGPIILTQIENEYGNIKKDHATDGDKYLEWAAQMALSTQTGVPWIMCKQSSAPGEVIPTCNGRHCGDTWTLRDKNKPMLWTENWTQQFRAYGDQVAMRSAEDIAYAVLRFFAKGGSLVNYYMYHGGTNFGRTGASYVLTGYYDEAPMDEYGMYKEPKFGHLRDLHNVIRSYQKAFLWGQHSSEILGHGYEVGNNFFNHFGFWKLILLFDSVLRPSNESS…
Zm00001d010212	Galactose-binding	5	308.231	7.34788	6.2838	37.2329	30.3686	GH35 + GHD + Gal_lectin	Cytoplasm	Extracellular	+	-	At5g63800, At1g77410¹	AtBGAL6, AtBGAL16¹		MAAAEIVVVAVVTLLLGLTSCMAESSVWREEDRRVRGEVTYEQRALVLDGARRMLFAGEMHYPRSTPEMWPKLIAKAKEGGLDVIQTYVFWNVHEPIQGQYNFEGRYDLVRFIKEIQAQGLYVSLRIGPFIESEWKYGGFPFWLHDVPNITFRSDNEPFKQHMQRFVTDIVNMMKHEGLYYPQGGPIITSQIENEYQMVEPAFGSSGQRYVSWAAAMAVDLQTGVPWTMCKQNDAPDPVINTCNGLICGETFVGPNSANKPALWTENWTSRYLIYGNDTKLRSPQDITFAVALFIARKNGSYVSYYMYHGGTNFGRFASSYVTTSYYDGAPLDEYGLIWQPTWGHLRELHAAVKQSSEPLLFGTYSNLSIGQEQEAHIFETETQCVAFLVNFDQHHISE…
Zm00001d022621	Galactose-binding	2	900.422	769.71	841.314	845.938	363.996	GH35 + GHD + Gal_lectin	Extracellular	Extracellular	+	-	At4g35010, At2g16730, At4g38590¹	AtBGAL11, AtBGAL13, AtBGAL14¹		MTVRAAAVLVAAAVLVLLLPGWAAAEWNLTKKGSVVTYDGRSLMIDGKRDLFFSGAIHYPRSPPEVWPKLIERAKEGGLNTIETYIFWNAHEPEPGKVMDIYSDGLVAHLLNVLQYNFEGRFDLIKYLKMIQEHDMYAIVRIGPFIQAEWNHGGLPYWLREIDHIIFRANNDPYKVIKEFHCCNKDMHVEFWLCDLSFAQIHQIENEYGNIKKDHATDGDKYLEWAAQMALSTQTGVPWIMCKQSSAPGEVDAAPPPCYTPRSTTNFPWSGRPRPPRSAGRSERSPAAAVITGRTGFRWPAQAAARVLRGARVAQRGDDRAPSASNIWSSSPRNTEAEDIAYAVLRFFAKGGSLVNYYMYHGGTNFGRTGASYVLTGYYDEAPMDEYGMYKEPKFGHLR…
Zm00001d027803	Galactose-binding	1	2717.58	2324.06	1955.14	1143.95	947.231	GH35 + GHD + Gal_lectin	Cytoplasm	Extracellular	+	-	At4g36360, At1g45130¹	AtBGAL3, AtBGAL5¹		MGRWWPAALLGCAVAVVAVLAAAVVECAVTYDKKAVLIDGQRRILFSGSIHYPRSTPDVISCILQNLSFFFSPLLPRGGGEFMAVVSCVLDAMLSKANCFPTLAVPLYSTSLLVLKRVLIVFLFHQMWEGLIQKAKDGGLDVIQTYVFWNGHEPTPGNYYFEERYDLVRFVKTVQKAGLFVHLRIGPYICGEWNFGGFPVWLKYVPGISFRTDNEPFKTAMQGFTEKIVGMMKSENLFASQGGPIILSQATNSQIENEYGPEGKEFGAAGQAYINWAAKMAVGLDTGVPWVMCKEEDAPDPVINACNGFYCDAFSPNKPYKPTMWTEAWSGWFTEFGGTIRQRPVEDLAFAVARFVQKGGSFINYYMYHGGTNFGRTAGGPFITTSYDYDAPIDEYGLI…
Zm00001d028474	Galactose-binding	3	905.157	3793.78	6665.23	2805.85	4568.47	GH35 + GHD + Gal_lectin	Cytoplasm	Extracellular	+	-	At2g28470¹	AtBGAL8¹		MAGTARILPAAAAALLLLLCIAGGARAANVTYDHRALVIDGVRRVLVSGSIHYPRSTPDMWPGLIQKAKDGGLDVIETYVFWDIHEPVRGQARTNTYIHHQFITHLAALSFFSAVIPSLLRSPTWQYDFEGRKDLAAFVKTVADAGLYVHLRIGPYVCAEWNYGGFPLWLHFIPGIKFRTDNEPFKAEMQRFTAKVVDTMKGAGLYASQGGPIILSQIENEYGNIDSAYGAPGKAYMRWAAGMAVSLDTGVPWVMCQQADAPDPLINTCNGFYCDQFTPNSAAKPKMWTENWSGWFLSFGGAVPYRPVEDLAFAVARFYQRGGTFQNYYMYHGGTNLDRSSGGPFIATSYDYDAPIDEYVDLFVTYDDDSGLVRQPKWGHLRDVHKAIKLCEPALIATD…
Zm00001d032022	Galactose-binding							GH35 + GHD + Gal_lectin	Extracellular	Extracellular or Vacuole/Lysosome	+	-	At4g35010, At2g16730, At4g38590¹	AtBGAL11, AtBGAL13, AtBGAL14¹		MHVDMSHRVRLAAAALVAVAALALALAPGAAAKWQRTRNGTVVSYDRRSLMFDGHREIFLSGSIHYPRSPPDMWPELIAKAKEGGLNTIETYVFWNIHEPEKGEFNFEGQNDVVRFFQLIQEHDMYAMVRLGPFIQAEWNHGGLPYWLREIPDIVFRTNNEPYKMHMETFVKIIIKRLKDANLFASQGGPIILAQIENEYQHMEAAFKDEGTKYINWAAKMAISTNIGIPWIMCKQTKAPSDVIPTCNGRNCGDTWPGPTNKSMPLLWTENWTAQYRVFGDPPSQRSAEDIAFAVARFFSVGGTLANYYMYHGGTNFGRTSAAFVMPKYYDEAPLDEFGLYKEPKWGHLRDLHQALKLCKKALLWGTPSTEKLGKQLEARVFEMPEQKVCVAFLSNHNT…
Zm00001d041880	Galactose-binding	4	472.425	628.42	932.283	2615.75	8397.13	GH35 + GHD + Gal_lectin	Cytoplasm	Extracellular	-	-	At2g32810¹	AtBGAL9¹		MTASPYPTTPWLRPPPPMAFLSLLLLLGCLSPSISLAGAEAAGVLRQVVGGDDGGTFFEPFNVTYDHRALILGGKRRMLVSAGLHYPRATPEMWPSLIAKCKEGGVDAIETYVFWNGHEPAKGQYYFEGRFDIVRFAKLVAAEGLFLFLRIGPYACAEWNFGGFPVWLRDVPGIEFRTDNEPYKAEMQIFVTKIVDIMKEEKLYSWQGGPIILQQIENEYGNIQGHYGQAGKRYMLWAAQMALALDTGVPWVMCRQTDAPEQILNTCNAFYCDGFKPNSYNKPTIWTEDWDGWYADWGESLPHRPAQDSAFAVARFYQRGGSLQNYYMYFGGTNFERTAGGPLQITSYDYDAPIDEYGILRQPKWGHLKDLHAAIKLCESALTAVDGSPHYVKLGPMQE…
Zm00001d042654	Galactose-binding	5	1275.08	1364.1	1319.46	1977.31	3103.26	GH35 + GHD + Gal_lectin	Cytoplasm	Extracellular	+	-	At5g63810¹	AtBGAL10¹		MAAAAASFSALPFLLLLLLVPSLDGASNVTYDHRSLIISGRRRLVISTSIHYPRSVPEMWPKLVAEAKDGGADCIETYVFWNGHEIAPGQYYFEDRFDLVRFVKVVRDAGLLLILRIGPYVAAEWNYGGVPVWLHYVPGTVFRTNNEPFKNHVKSFTTYIVDMMKKEQLFASQGGNIILAQIENEYGDYYEQAYGAGGKPYAMWAASMALAQNTGVPWIMCQESDAPDPVINSCNGFYCDGFQPNSPTKPKIWTENWPGWFQTFGESNPHRPPEDVAFAVARFFEKGGSVQNYYVKVDKFSAILLKYHGGTNFGRTTGGPFITTSYDYDAPIDEYGLALFLSTSEISKVGTSEGSSQIYKIADIYSDQSGGCVAFLANIDSANDKVVTFRNRQYDLPAW…
Zm00001d042656	Galactose-binding							GH35 + GHD + Gal_lectin	Extracellular	Extracellular	-	-	At1g77410³	AtBGAL16³		MTGAGVATVAMVVVAALAAAGRGAGGERGNTTAGRGEVTYDGRALILDGARRMLFSGDMHYPRSTPEMWPDLIAKAKKGGLDVIQTYVFWNAHEPVQGQFNFEGRYDLVKFIREIHAQGLYVSLRIGPFVESEWKYGGLPFWLRGIPNITFRSDNEPFKRHMQKFVTKIVNLMKDERLFYPQGGPIIISQIENEYKLVEAAFHSKGSSYVHWAAAMAVNLQTGVPWMMCKQDDAPDPIYHGGTNFGRVASSYVTTSYYDGAPLDEYGLIWQPTWAHLRELHAAVKQSAETLLWGAYSNHSFGQQQEGHVFATDSGCVAFLVNFDMHKVSTIQFGEGVFQLAPKSISILSQCRDLIFETGKINAQHGLRTAQVVQPLNHAHRWKLFKEPIPAVPSKISHV…
Zm00001d043393	Galactose-binding							GH35 + GHD + Gal_lectin	Extracellular	Extracellular	+	-	At5g20710, At1g31740¹	AtBGAL7, AtBGAL15¹		MTALQFLLLALVAVTQVASATTVTYNDRALVIDGQRRIILSGSIHYPRSTPQMWPDLINKAKEGGLNTIETYVFWNGHEPRRRQYNFEGSYDIIRFFKEIQNAGMHAILRIGPYICGEWNYGGLPAWLRDIPGMQFRLHNAPFEREMETFTTLIVNKMKDVNMFAGQGGPIILAQIENEYGNIMGQLKNNQSASQYIHWCADMANKQEVGVPWIMCQQDNDVPHNVINTCNGFYCHDWFPNRTGIPKIWTENWTGWFKAWDKPDFHRSAEDIAFAVAMFFQKRGSVHNYYMYHGGTNFGRTSGGPYITTSYDYDAPLDEYGNIRQPKYGHLKDLHDLIRSMEKILVHGKYNDTSYGKNVTVTKYMYGGSSVCFINNQFVDRDMKVTLGGETHLVPAWSV…
Zm00001d044290	Galactose-binding	2	1333.96	1890.35	2760.43	1565.75	738.415	GH35 + GHD + Gal_lectin	Extracellular	Extracellular	+	-	At3g13750, At3g52840, At5g56870, At4g26140¹	AtBGAL1, AtBGAL2, AtBGAL4, AtBGAL12¹		MAPAAPAGLASVAVAVAVAVLAAAASAAVTYDRKAVVVNGQRRILMSGSIHYPRSVPEMWPDLIQKAKDGGLDVVQTYVFWNGHEPSRRQYYFEGRYDLVHFIKLVKQAGLYVHLRIGPYVCAEWNFGGFPVWLKYVPGISFRTDNEPFKAEMQNFTTKIVDMMKSEGLFEWQGGPIILSQIENEFGPLEWDQGEPAKAYASWAANMAVALNTSVPWVMCKEDDAPDPIINTCNGFYCDWFSPNKPHKPTMWTEAWTSWYTGFGIPVPHRPVEDLAYGVAKFIQKGGSFVNYYMYHGGTNFGRTAGGPFIATSYDYDAPIDEYGLLREPKWGHLKELHKAIKLCEPALVAGDPIVTSLGNAQQASVFRSSTDACVAFLENKDKVSYARVSFNGMHYDLP…
Zm00001d048440	Galactose-binding	2	1694.94	2283.16	2676.82	856.655	495.634	GH35 + GHD + Gal_lectin	Cytoplasm	Extracellular	+	-	At4g36360, At1g45130¹	AtBGAL3, AtBGAL5¹		MRRWWPAALLGCAVAVSVLVAAVECAVTYDKKAVLIDGQRRILFSGSIHYPRSTPDMWEGLIQKAKDGGLDVIQTYVFWNGHEPTPGNYYFEERYDLVRFIKTVQKAGLFVHLRIGPYICGEWNFGGFPVWLKYVPGISFRTDNEPFKTAMQGFTEKIVGMMKSENLFASQGGPIILSQASIIFSLDLIENEYGPEGREFGAAGQAYINWAAKMAVGLGTGVPWVMCKEEDAPDPVVYSIIPVKNDAVVLIIKIINACNGFYCDAFSPNKPYKPTMWTEAWSGWFTEFGGTIRQRPVEDLAFAVARFVQKGGSFINYYMYHGGTNFGRTAGGPFITTSYDYDAPIDEYGLVREPKHSHLKELHRAVKLCEQALVSVDPAITTLGTMQEARVFQSPSGCA…
Zm00001d053225	Galactose-binding	1	47.3791	19.8639	18.0149	15.4669	13.3501	GH35 + GHD + Gal_lectin	Extracellular	Extracellular or Vacuole/Lysosome	+	-	At4g35010, At2g16730, At4g38590¹	AtBGAL11, AtBGAL13, AtBGAL14¹		MHVDMSHRVRLAAAALVVVAALALAPGAAAAWQLTKNGTVVSYDRRSLIIDGRREIFFSGSIHYPRSPPDMWPELIAKAKEGGLNTIETYIFWNIHEPEKGQFDFEGRYDIVRFFKLIQEHNMYAMVRLGPFIQAEWNHGGLPYWLREIPDIVFRTNNEPYKMHMETFVKIIIKRLKDANLFASQGGPIILAQIENEYQHLEAAFKNDGTKYIKWAANMAISTNVGIPWIMCKQTKAPSDVIPTCNGRNCGDTWPGPMNKSMPLLWTENWTAQYRVFGDPPSQRSAEDIAFAVARFFSVGGTMTNYYMYHGGTNFGRTSAAFVMPKYYDEAPLDEFGLYKEPKWGHLRDLHLALKLCKKALLWGKTSTEKLGKQFEARVFEIPEQKVCVAFLSNHNTKD…
Zm00001d007762	Galectin-like	4	78.8185	61.8732	74.9184	200.651	184.609	Gal-bind_lectin + GT31	Golgi apparatus	Golgi apparatus	+	-	At1g27120, At1g74800, At5g62620²	GALT4, GALT5, GALT6²		MRKAASTAMAGAGATFRRRAMEGLATVLLLYALLVLALESPLVSTSPFGGAAGGTARKLHLSFGAGERAAPVPGASAHGQDHRLSRFASGLDVRLLDSARSGALRRSIADAVAAGARAFSDLEALDPAAVAAPSGESDAARCPHSIALTAEELGARGRVVELPCGLALGSHITVAATPRAPHEERNPAIAVLRDGERHAMVSQFMVELQGLRAVDGEDPPRVLHFNPRLRGDWSGHPVIEQNTCYRMSWGAAQRCDGWRSRPDEETVDGLVKCEKWIRDDDDRLEKSKTTSKTAWWLNRLIGQKEEVNFGWPFPFVEGRLFVLTLSAGLEGYHVSVDGRHVTSFPYRTGFVLEDATGLSLNGDLDVHSVIAGSLPTTHPSFAPHNYLEFSNVWQAPLLP…
Zm00001d007764	Galectin-like	3	644.415	600.032	1342.88	4380.93	1785.23	Gal-bind_lectin + GT31	Golgi apparatus	Golgi apparatus	+	-	At1g27120, At1g74800, At5g62620²	GALT4, GALT5, GALT6²		MPTPPPRKKRLVRAGLLAAAAGYFAFVLLFELPLLPFLASSSPAATTSSSSSSLPFQHPRRRELEAAAAAFTSPFSPARPSKRAFPAAAAPAPGSTPRLPIFSSLLLLPRPNATATPFDNTAADAFAAAKPHLAHLQATANPTAASAPASSPPPTCPASVAVHREQLPYDGVRVVELPCGLAVGSHVTVVARPRPARPEYDPKIAERKDGEAAVMVSQFMVELVGTKAVDGEAPPRILHLNPRIRGDYSRKPVVEMNSCYRMQWGQSQRCEGFASRPVEDTVDGQLKCEKWIRDDDSKSEESKMKWWVKRLIGRPKDVRIIWPYPFTEGKLFVMTLTAGLEGYHVNVDGRHVASFPYRTGYSLEDATALSLNGDIDIESIFASSLPNSHPSFAPERYLE…
Zm00001d013052	Galectin-like	2	354.989	237.514	456.936	406.204	329.202	Gal-bind_lectin + GT31	Golgi apparatus	Golgi apparatus	-	-	At1g27120, At1g74800, At5g62620²	GALT4, GALT5, GALT6²		MERELKLPGTHAPSQVNLSCSGTFFFLPPCALGRLRRCLAPSAPTTEAHARAQRPSRASPSALLCPPAWLLPPPPPPPLGLGHASRGPVAPGAMRRPSGAGVPSRRRRAIQVLVAVSLAYAVAVLLLESPLVSTSLPGAGASAAASRKLHLDGAWEGAGRAAPARPAKHPHRETLSADAGRGRARRLAGIVSGLELRHLNSTRSGSLRKVAAEAAESGARVFSDLEALATALTFSGDSSGEEEEKSKCPHSIVLSGDEFRERGRAVELPCGLTLGSYITVAATPHEAHPERDPKITLLREGEEPIMVSQFMMELQGLKTVDGEDPPRILHFNPRLRGDWSGKPVIEQNTCYRMQWGTPLRCDGWRSRADEETVDGLAKCEKWIRDDEGRSEESKTSWWL…
Zm00001d019094	Galectin-like	5	11.502	7.17899	3.64723	36.623	71.4512	Gal-bind_lectin + GT31	Golgi apparatus	ER	-	-	At1g27120, At1g74800, At5g62620²	GALT4, GALT5, GALT6²		MEGLAAVLLLYALLVFALESPRVSTPLSGGWRYSAEAPPLLRRGRARGVRPRRVGARTGSSALPLRHRPRRLAPRLRPLRRAPPVRGGRCRGGRPRVLRPRGPRPRRRRRALRRERHGQVPALDRARRGGARRAEPRGGAALRARAGSHITVAATPRAPHEERNPAIAVVKDGERPAMVSQFMVELQGLRAVDGEDPPRVLHFNPRLRGDWSGQPVIEHNTCYRMNWGAAQRCDGWRSRPDEETGWGPLSVHVDGLVNARSGLGTIMTGVCARGCYRSVTEWGPRCAFSDCRVFAHYTPKLCDLEFSTVWQAPPLPDESVEIFIGIMSSANHFAERMGVRKTWMSAVHKSPSTVARFFVALHGRKEVNVELKKEAEFFGDIVFVPFLDNYDLVVMKTLA…
Zm00001d020814	Galectin-like							DUF223 + Gal-bind_lectin + GT31	Golgi apparatus	Plasma membrane or Cytoplasm	+	-	At1g27120, At1g74800, At5g62620³	GALT4, GALT5, GALT6³		MFETDDGAGGQPDPEMASSLLDMLNENNSLVKAFRYARERLEREETVQGIADAIDKGSVNADSVGGRVVVPASFTGGRRTYNGQVYDTFRDACEARGLLESDNEWKMLFDEAIISASSYQLRQLFVTVVMFCPVGNMGDMLIPELQRGNTSVTICARVSRLWDFCDPQDEAKLLHCDMVLLDEEGNGIHAAIFPPVIQKFKPLIKEGVVYNITYFRVRASNNLYKPVFNENMITFTNWTKLEEVVEVPPAFPMLTYSLTPMDQLHLCVDHREYYTDGLCLSGGSPCKWYINPDVPEAGALMARYKLLLTAGDETGDTDFILFGRMAQRIIKKPCDMLIANNPIGFIPDPITDLLEKTYIWNVVQLKAFDRFENTSDAQSAATLIIDSRPSKGLHRFLHK…
Zm00001d033573	Galectin-like	5	14.5946	2.84156	2.40493	0.471459	36.1751	Gal-bind_lectin + GT31	Golgi apparatus	Mitochondrion	+	-	At1g27120, At1g74800, At5g62620²	GALT4, GALT5, GALT6²		MRRQRRTGGLRPVLLLLPFAALISVATFSLHSADRLLSSSDTGTAQKAASSSRQHRRLPVATLDVRALDAAPPLHAAAARAFRSGGRLLRDVLSSSSPSAPAPPPAGPGAARCPASIVRSGAQLRGAGGGVLLPLPCGLTLGSHVTVVGAPRGGRGAAAVAQFAVELRGEGDGDEAPRILHFNPRLSGDWSRRPVIEMNTRFRGQWGPALRCDGRRSRPDLETVDGLVTCEEWSKNIDDASEELKRLWLRNRVAGKNNRNWLHWPYPFLEEEMFVLTLSAGLEGYHFHVDGKHVTSFPYRVGFLLEDATILSVNGNIDIKSIVAGSLPTTHPSIVQRNLELLTELKTPPLGKENVELFIGILSAGSHFTERMAVRRSWMSLVRNSSSIVARFFVALNGR…
Zm00001d033748	Galectin-like		0.908156	0.926218	0.793528	8.98452	6.40555	Gal-bind_lectin + GT31	Golgi apparatus	ER	+	-	At1g27120, At1g74800, At5g62620²	GALT4, GALT5, GALT6²		MEGLATVLLLYALLVLALESPLVSTSPFGGAAGGTARKLHLSFGAGERAAPARPASASVPGASAHGQDHRLSRFATGLDVRLLDSARSGALRRSIADAVAAGARAFSDLEALDPAVVAAPSGESDAARCPHSIALTAEELGARGRVVELPCGLALGSHITVAATPRAPHEERNPAIVVLRDGERHAMVSQFMVELQGLRAVDGEDPPRVLHFNPRLRGDWSGHPVIERNTCYRMSWGAVQRCDGWRSRPDEETVDGLVKCEKWIRDDDDRLEKSKTTSKTAWWLNRLIGQKEEVNFGWPFPFVEGRLFVLTLSAGLEGYHVSVDGRHVTSFPYRTNYLEFSTVWQAPLLPDEPVEIFIGILSAANHFAERMGVRKTWMSVVHKSPNMVARFFVALHGRT…
Zm00001d034508	Galectin-like	1	265.502	167.871	43.7334	24.0903	107.823	Gal-bind_lectin + GT31	Golgi apparatus	Golgi apparatus	+	-	At1g27120, At1g74800, At5g62620²	GALT4, GALT5, GALT6²		MPPKRACRLALLAAAAAYLLFLLLFELPSFSVSTASPRLAQAATRRELLRASSARSPLRPRTSAPLAVSSVRVHRRATSSSSSASAAAAISSIDASAAAAFAAAAPHLARLLSAPAPPSSAPSPSPTAAASASCPATVSAPRDQLASGAGVAVDLPCGMAVGSRLTVVARPRAARPEVAGAGDGAAPPVMVSQFMLELLGTKAVQGEEPPRILHFNPRIRGDFSARPVIELNTCYRMQWAQPQRCEGWQSRPDDDTVDGELKCDEWIRDGNNETQESRMKRWLNRLIGRPKVNRPYPFAEGKRFVLVITAGLEGYHVNVDGRHVTSFPYRTGYNLEDATQLSLKGDIDVESVLAGSLPTSPPTSATRSYLEMSKQWKASPLPTEPVELFIGILSSANHF…
Zm00001d034511	Galectin-like	5	117.143	61.8646	73.4633	104.803	176.015	Gal-bind_lectin + GT31	Golgi apparatus	Golgi apparatus or ER	+	-	At1g27120, At1g74800, At5g62620²	GALT4, GALT5, GALT6²		MRRPSGAGAPCRSRAIQVLVAVSFAYALAVLLLESPFVSTSLLGAGASAAASRKLHLAGAWEGVRRAVPARPAKHPHRETLSSDAGRGRARRLAGIVSGLELCHLNSTRSGSLRKVAAEAAESGARVFSDLEALATALASSRDSSGEEEKSKCPHSIVLSGDEFRERGRAVELPCGLTLGSYITVVATPHEAHPERDPKITLLREGEEPIMVSQFMMELQGLKTVDGEDPPRILHFNPRLRGDWSGKPVIEQNTCYRMQWGTPLRCEGWRSRADEETVDGLVKCEKWIRDDEGRSEESKTSWWLNRLIGRTKTVSVDWSYPFVEDRLFVLTLTAGFEGYHVNVDGRHVTSFPYRTGFVLEDATGLSLDGDLDVQSVFAGTLPTTHPSFSPQKHLEMLPS…
Zm00001d037233	Galectin-like	2	286.236	284.149	333.961	308.636	282.432	Gal-bind_lectin + GT31	Golgi apparatus	Golgi apparatus	+	-	At1g26810²	GALT1²		MMKKWHGGFAIVSLFIILMLRYVILDNPLVENSLQYVFQQNRTAELHWLDVPNPPAIQNLQISSEVISTGLLASNLSITRNLSDRELQSLHSWNHLKQLLSHVHILPDGVEAIKEAGVAWRELNTALAYDDAVSVNGSIQQKDKGKQCPYSIRRMNATRLGDRFALKLPCGLIQGSSITIIGTPGGLLGNFKIELTGAAVPGEPDPPIVLHYNVRLLGDKLTEDPVIVQNTWTISDDWGSENRCPSPDSDAKDTTKVDDLEKCSSMVGEDQKEILPSKFHSNVSAMPPASKKKAEPRKYFPFRQGYLAVAILRIGAHGIHMTVDGKHITSFAFREDLEPGFVGEVRIAGDIKLLSVIASGLPTTEDFEHVTDLEILKAPPVPMDKPVDLFIGVFSTANN…
Zm00001d040724	Galectin-like	1	1240.59	1194.34	1021.5	665.994	546.989	Gal-bind_lectin + GT31	Golgi apparatus	Golgi apparatus	+	-	At3g06440²	GALT3²		MKKCSGVLFILTLAVVLFLLSPSPSPTPPPNTAPNGPITDLLPTLPGLSDLYPPAPNSTAHLSWGLLRPLLCRSDALPGTSAGVLEAAEAWRNLTLAVTAAASEEEARLQGLRCSSSVGGDLRTGRATLPCGLSEGAALTVVGILREGAAKFWVEMLGANGEVVLHVNVSLGAAGVLVEQNSWTPEEGWGEWERCPPVGDVGSSNSSLQLSPVDGLVHCNEKVGARIVQESNNTVVNITGNQPEDWQSQTGHGQLSGRFSIVEGEPFTVTLWAGVEGFHMTVNGRHETSFAYRERSEPWLVAEVMFSGDLELLSFLANELPVSEDIDMENVAVLKAPPLPKKQTFLLVGVFSTGNNFKRRMALRRTWMQYEAVRSGDVVVRFFTGLHKNEQVNMELWRE…
Zm00001d041504	Galectin-like	2	978.264	935.301	1060.75	1026.34	875.124	Gal-bind_lectin + GT31	Golgi apparatus	Golgi apparatus	+	-	At4g21060²	GALT2²		MKRARSSEVFIGVGRLRARRGLAPLLAAAAFAYLLFVSVKLTYLGSAGPAPAVGRLATTGAGEPAARARSSGGGAVSGYGRITGEILRRHEAFEERRKRWGQLGNFTELERVAAEAWALGAAAWEEASAFDGDVDYIASRDVAGEGTAKCPGSLALGAGETTAFLPCGLAAGSAVTVVGTARTARPEYVEALERSGTGNGTVLVAQFAVELRGLRATDGEEPPRILHLNPRLRGDWSSRPVLEMNTCFRMQWGRAQRCDSTPSGDDDLVDGLRKCEKWDWQDVVESKETKTSSWFNRFIGRAKKPEMRWPFPFSEGKMFVLTIQAGVEGYHINVGGRHVASFPHRMGFALEDATGLAVTGGIDVHSVYATALPKAHPSFSLQQVLEMSERWKARPVPEE…
Zm00001d044471	Galectin-like							Gal-bind_lectin + GT31	Golgi apparatus	Golgi apparatus	+	-	At1g27120, At1g74800, At5g62620³	GALT4, GALT5, GALT6³		MRRPSGAGVPSRRRRAIQVLVAVSLAYAVAVLLLESPLVSTSLPGAGASAAASRKLHLDGAWEGAGRAAPARPAKHPHRETLSADAGRGRARRLAGIVSGLELRHLNSTRSGSLRKVAAEAAESGARVFSDLEALATALTFSGDSSGEEEEKSKCPHSIVLSGDEFRERGRAVELPCGLTLGSYITVAATPHEAHPERDPKITLLREGEEPIMVSQFMMELQGLKTVDGEDPPRILHFNPRLRGDWSGKPVIEQNTCYRMQWGTPLRCDGWRSRADEETVDGLAKCEKWIRDDEGRSEESKTSWWLNRLIGRTKTVSVDWPYPFVENHLFVLTLTAGLEGYHVNVDGRHVTSFPYRTGFVLEDATGLSLNGDLDVQSVFAGTLPTTHPSFSPQKHLELL…
Zm00001d044823	Galectin-like	4	264.658	332.202	416.752	518.64	745.997	Gal-bind_lectin + GT31	Golgi apparatus	Golgi apparatus	+	-	At1g26810²	GALT1²	SCW4g	MKKWHGGFVIVSLFIILMLRYVILDRLLAEKSLQYVFQQNRTAELHWLDVPNPPAIQNPQISSEVISTRLLASNLSITRNLSDTELQSLHSWNHLKHLLTHAHILPDGVEAIKEAGVAWRELNTALAYDDSVVSVNGSIQQKDKGKQCPYSVRRMNATRLGDRFALKLPCGLIQGSSITIIGTPGGLLANFKIELTGAAVPGEPDPPIVLHYNVRLLGDKLTEDPVIVQNTWTIADDWGSENRCPSPDSDAKDSAKVDDLEKCSSIVGEDQKEILPSKLHSHVLTMPPARKKKAESRKYFPFRQGYLAVAILRIGAHGIHMTVDGKHITSFAFREDLEPGFVGEVRIAGDIKLLSVIASGLPTTEYFEHVTDLEILKAPPVAMDKSVDLFIGVFSTANN…
Zm00001d049617	Galectin-like	2	761.842	860.89	1046	764.387	438.777	Gal-bind_lectin + GT31	Golgi apparatus	Golgi apparatus	+	-	At4g21060²	GALT2²		MARRVRPSHLVLALAAAYLLLISLKFRRVLDLAATDLADDPAAAAAAAFSSPSSADHLPPPGSASATSSSSSPPFPVRPFWHRYDRVSLPDLASRNRSALDRMADDAWALGLTAWEDAAAFAGDPWALLAAATSRASDAAKCPSAVSQRARGRVVFLPCGLAAGSSITVVGTPRASHREYVPQLARMRQGDGTVMVSQFMVELQGLRAVDGEDPPRILHLNPRLRGDWSQHPILEHNTCYRMQWGAAQRCDGTPPDDNDDKVDGFPKCEKWIRNDIVDTKESKTTSWLKRFIGRAKKPAMTWPFPFVEERLFVLTIQAGVEGFHIYVGGRHVTSFPYRPGFTLEDATGLFVKGDVDIHSVYATALPSSHPSFSLQQVLEMSEKWRSRPLPKGPVSLFIG…
Zm00001d050885	Galectin-like							Gal-bind_lectin + GT31	Golgi apparatus	Golgi apparatus	-	-	At1g26810²	GALT1²		MWATKKLATTALLVLTSLLAARYLIEHTASSGMSSRYQILHLVHHLEWLKSPADAKETSPGVVITTAASSNTSSEPEDSASKNSSAAAQVFPWLDTWSQMTRLADIASGLPHATEAVDDGRTAWENLTASVHVHQRQRRRLCPYSVRDTPSNKPESGGGGGAFTVGVPCGLTVGSSATLIGTPGLLSGNFWIELVGTTTALPAGETETPAVPLHYGVRLTGDDGATRDRPPVLVQNAFSASSGWGAEARCSCTPGNAAAEGAPPAAVVDGLERCDAMADREEEEDKKHKHLHGGCFPFKQGYLAIATLRVGWEGFHMTVDGKHVTSFAYRAGLEPWYVTQVRISGDFKLASAILSGLPTSEDLENPNLESLKAPPVPNDRDVDLLIGVFSTANNFKRRM…
Zm00001d052499	Galectin-like							Gal-bind_lectin + GT31	Golgi apparatus	Extracellular or Cytoplasm	-	-	At1g27120, At1g74800, At5g62620³	GALT4, GALT5, GALT6³		MNGRRQSLEELQRSEYEKMMETIAEWETEKKCTINSVFPSSKGYHVNVDYLFVLTLTAGLEGYHVNVDGQHVTSFPYRTGFVLEDATGLSLNGDLDVQSVFAGTLPTTHPSFSPQKHLELLPSWQAHPLPDEPVEIFIGILSAGNHFAERMSAA
Zm00001d002168	GNA	1	186.339	40.8138	8.85981	22.916	51.4582	B_lectin + S_locus + PAN + PK	Plasma membrane	Plasma membrane	+	+				MDTIFVHLLLLSFMILRPIAIAADVPESDTLGKGRNITDGETLVSADGTFTLGFFSPGASTKRYLGIWFSASSVAVCWVANGGRPVNGNSGVLVVRDTGSLLLLDGSGQTIWSSNSTSSSSSAEAQLLNSGNLVVRDGGSSSSSDAILWQSFDHPSNTLLSGMKLGKNKWTGAEWYLTSWRSADDPSPGAYRRALDTSGLPELVVWEGNVRTYRTGPWNGRWFSGVPEVSAYRNLIWYQVTTSPAEVSYGYTSNPGAALTRVVLTDAGVAKRLVWDAGARTWQTFFQGPRDVCDAYGKCGAFGLCDAGAASTWFCTCLTGFSPASPPAWSLRDTSGGCKRNVKLDCANNGSGTTTTTDGFLLVRGVKLPDTHNATVDMSITVEDCAARCLANCSCLAYA…
Zm00001d002172	GNA	1	142.572	83.6374	32.0692	33.3507	46.1155	B_lectin + S_locus + PAN + PK	Plasma membrane	Extracellular	+	-				MDMTSLTISILLLLLMIRVCKSDDQLASARPLSPGDLLISKGGVFALGFFSPSGSNTSTSLYVAIWFHGIPERSRTVVWVANRDSPATTSSSPTLAISNSFDLVLSDSQGRTLWRTQNAAAAAVHDSGTPLAVLLDTGNLQLQLPNGTVIWQSFDHPTDTILPGMRFLMIHGARPAARLVSWRGPADPSTGAFSFGLDPVSNLQLMVWHGAEPYCRISVWNGVSVSGGMYTGSPSSIVYQTIVNTGDEFYLTYTVSDGSPYFRIMLDHTGTMKLLSWDTNSSSWTLISERPTGGYGLYGSCGPNAYCDFTGAAPACQCLEGFEPVAADLNSSEGCRRTEPLQCSKASHFVALPGMRVPDKFVLLRNRSFEQCAAECSKNCSCTAYAYANLSSSGAMEDQ…
Zm00001d002173	GNA							B_lectin + S_locus + PAN + PK	Plasma membrane	Plasma membrane	+	+				MTRLLCLTALTIFPIILCLTTSAAVTASDTLDSGSNITDGATLVSAGGSFTLGFFSPTGVPTKRYLGIWFTASPEAICWVANRETFLSNTSGGVLVIGSTGSLRLLDGSGRTAWSSVDSTSSSAPPVVAQAQLLESGNLVVRDQSGRDVLWQSFDHPSNTLLAGMRFGKDPRTGAEWFLTSWRASNDPTPGGYRRVLDTRGGLLDSVSWKGSVKKYRTGPWNGLWFSGIPETASYKDMYSTQLVVRPDEIAYVFNTAAGAPFCRLVLNEVGMVQQLGWDPVSRVWNVFTQAPRDVCDNYAKCGAFGLCDVKSGSTLFCSCAVGFSPVNPSQWSMRETRGGCRRNVPLECGNGTTTDGFKMVRAVKLPDTDNATVDMGATLEQCRARCLANCSCVAYAAA…
Zm00001d002174	GNA	2	32.9666	35.5786	43.502	15.3192	29.7649	B_lectin + S_locus + PAN + PK	Plasma membrane	Extracellular	+	-				MATSKKGLMAMVYIRSAFILIFLSSPCQSNDQLTQTKPLLLEDTLISEGGDFALGFFSPTNSSKKLYIGIWYHRVTERTVVWVANRDNPITTPSAMLAITDNLELVLSDSQGHTLWMATGNTSGDAGGAASAVLLNSGNFVLRLPNGTEVWHSFDHPTDTILPTMRILLSFKTQPATRLIAWKGPDNPSTGDISSGMDSTNLQMFIWKGALPYYRFPVVNDMAVAGAMYQQSNGNAAIMYETRVNAGDALYYTYTVSSGSPYTRFSLDYTGKGRLLSWNSTTSSWTVIIEHPHSCDLYASCGPFSYCDQMGPLPTTCQCPDGFELLNSLNFSRGCRRKEELKCGVGNYFMAMSSMKLPDKFLHIKNRTFDQCADECTRNCSCMAYAYANLSSIGAVGDT…
Zm00001d002178	GNA							B_lectin + S_locus + PAN + PK	Plasma membrane	Golgi apparatus	-	-				MALSYRQKFFCQNRQDKNHISVKSGRKNLIPTGMAYLYLPVFIFLLSMACSCQSDDRLTPAKPLLPGDMLISHGGVFALGFFSLTNSSSSSYVGIWYNNIPERTYVWIANRDNPITTDVPGTKLAFTNSSDLVLLDSTGHTIWMTRSSISAGGGGTAAVVLLDSGNLVIQSIDGTAIWESFDHLTDTVIPGVSLSLSSSDAAASARRLVAWKGPDDPSSGNFSMGGDSSSDLQIVTWNGTRPFWRRAAWGGEVTFGTFEDNTSFTMYETITGGTGDDYYIKLTVSDGAPIIRVSLDYTGLFTYRRWNLKTSSWTVFVQFPSSACDRYAFCGPFAYCDSTETVPSCKCLDGFEPIGLDFSQGCRRKEELKCGDGDTFLTLPTMKTPDKFLYIKNRSFDQC…
Zm00001d002181	GNA	2	117.911	150.687	136.281	119.05	89.83	B_lectin + S_locus + PAN + PK	Plasma membrane	Plasma membrane	+	+				MAYLPVFVFLFMVVLCQSDDRLTPAKPLLPNEVLISGGGVFALGFFSLKNSSRSYVGIWYNNIPERTYVWIANRDNPITTNVPGKLVFTNSSDLVLLDSTGRTIWTTTNNYTAGGGGETASILLDSGNLVIRLPNGTDIWESFSYPTDTIVPNVNFSLNVASSATLLVAWKGPDDPSSSDFSMGGDPSSGLQIIVWNGTQPYWRRAAWGGELVHGIFQNNTSFMMYQTVVDTGDGYYMQLTVPDGSPSIRLTLDYTGMSTFRRWNNNTSSWKIFSQFPYPSCDRYASCGPFGYCDDTVPVPACKCLDGFEPNGLDSSKGCRRKDELKCGDGDSFFTLPSMKTPDKFLYIKNRSLDQCAAECRDNCSCTAYAYANLQNVDTTIDTTRCLVSIMHSVIDAA…
Zm00001d002199	GNA	1	29.401	1.80148	0	0	0.587339	B_lectin + S_locus + PAN + PK	Plasma membrane	ER	+	-				MTKTNTMRSHHHGYSHRHCHLLVQSSILLFLGTFAAAQAASDILSKGSNLTNGETLVSANGSFTLGFFTRGVPARRYLGIWFTVANSSSDAVCWVANRDLPLGDTSGVLVISDTGSLVLLDGSGRTAWSSNTTAGAASPTVKLLESGNLVLLDGNGGRDDYDVVKLWQSFDHPTNTLLPGAKIGMNLWSGGGWSLTSWRDADDPSTGEFRYAMVRRGGLLPEIVMLDSSDAIKYRTGVWNGRWFSGIPEMNSYSNMFVFHVTVSQSEVSFSYAANAGAPPSLSRVLLNYTAEAVRVVWVPDKRGWANFFTGPREDCDHYNRCGHSGVCNQTAASTAWPCSCVQGFVPVSSSDWDGRDPSGGCRRNVSLDCGDNGTTDGFVRLPGVKLPDTLNSSLDTSI…
Zm00001d003723	GNA	5	1.18508	0.602653	0.838714	3.16035	24.4316	B_lectin + S_locus + PAN + PK	Plasma membrane	Plasma membrane	-	+				MHVVRAFVLSVLLVILHAPSPYAATDTLRHGHALAGSDKLVSGNGKFALGFLQLQPGSSYYLGIWFDKVPVLTPVWAANRDNPVSANSTWRELVISDDGNMVFQAQGATVWSTRANTTTNDTVAVLLGNGNLVLRSASNSSLTFWESFDYPTDTQLPGVKVGWNKVTGLNRRLVSRKNAVDLSSGIYSSTLGRDGVARMLWNSSSVYWSSTWNGRFFSAVPEMSAGSPLANFTFVNNDQEVYFTYNIFDESTIVRTTLHVSGQNQVRVWTGQDWMTGNNQPAHQCDVYAVCGPFAVCEPNGDTLCSCMKGFSVRSPSDWEVEDRTGGCVRDTPLLSCGAGDGNSGTGMAADKFYSMPGIRLPQNGKAMPADASSAKQCAQVCLSSCSCTAYSYGKDGCS…
Zm00001d006297	GNA		7.0747	8.98672	10.0222	5.73904	12.6732	B_lectin + S_locus + PAN + PK	Plasma membrane	Plasma membrane	+	+				MEWSRPACIPVTAAAVVLLLLLLPRFCSPAGDKLTPGESLLPGETIVSDGGAFALGFFAPSNATPGRQYVGIWYNNIPVQTVVWVANRDAPVTVGDARSGNSSSSSSSAPSLALANGSASTDLVLSDAGGGRVVWTTNTTSSGTGSTAVLLNSGNFVLRSPNGTTLWQSFDHPTDTFIPDMKVGLRYRTHDGARIVSWRGPGDPSPGTFSYGMDPRTSLQMLMWNGTRTYWRSSAWTGYMTVSRYHATTGTVIYVAVVDSEDEIYMTFHVNDGAPPTRYVVTGAGRFQLLSWNRDASAWTTLESWPSRSCSPYGSCGAYGYCDNTLAVATCRCLDGFEPASPAEWSGGVFSRGCRRRSQQQALAPCGGEDDGDAFLDMPNMKVPDRFVLLGTNVSSGDE…
Zm00001d006471	GNA	5	18.2352	8.03376	5.36963	12.3763	48.8201	B_lectin + PAN + PK	Plasma membrane	Plasma membrane	+	+				MGAAKRVVCWRPSAAPLATCFFSLAVATLAAASDTILPGGDGISGNQTLVSQNGVFELGFFSPGTDIYHFLGVRIRNMPGDAGTTPTFWFGDRVYISDLSSAALQLIGDRLYITENGTNLWWSSVAGAAAAASAAYSAVAAVLLDSGNLVVVARDQANSSSSRVLWQSFDYPGDALLPGARLGLDGDTGTNVSLTYRNANSWHSSSLSVDVDPRRRNGFVLTTDGWDVHRGTFPAWMVSSQGNGSSLVLLNNTRPGPGLGPAADGAGMVAEHLQLHLGQVSLRSWSSSAGCWVARWTFPSDCRSSAFFCGRFGVCTSAGTCACVDGFEPSKPCEWQRGYFVDGCTRSHPLSCTADDSGRQDDSFLLLDNLRGLPYSSIPQNDTAAQGDEGCREACAGKC…
Zm00001d007789	GNA	4	148.394	147.595	413.139	1076.79	4218.8	B_lectin + PAN + PK	Plasma membrane	Plasma membrane	+	+				MPASPYSYTLLVGLFLVSLLLHSPRPCSCANYHTLAAGQALAVGDTLVSRNGKFALGFFPSGTTTTPAASKSSSSSDNNSNTTAVSNWYLGIWFNKIPVFTPVWIANRDDPFTDPDADPNNKLLPKRTLQISRDGNLVVVQEDNNAPQRTETLVVWSTTTTSSNTTSTNTNNTSTNTTNTVAELTHNGNLVVRDASASDASKVRWQSFDYPTDVYLPGSKLGRNKVTGLNRVFVSRKNRANPARGSYCVGVDSRFSQGIILSQCSSSVVYWASGTFSLSDVDPSDSGFISYNQIDNAQEQYYIYTIPNDTLSVYTAVETSGQIKGRVWVESSHAWRDFYTQPMNPCSVHAACGPFTVCTTTGGGDNNANMSCDCMEGFSIRSPSEWDLDDRAGGCTRNN…
Zm00001d008891	GNA	1	201.626	73.5564	88.1901	64.4967	109.304	B_lectin + PAN + PK	Plasma membrane	Plasma membrane	+	+				MPPSHRLSLLLAVAVVVAATSVRVHVHAQGSVLFPTPASTNVSVTWTVSLKADGHGAQSFDYMDGTSASVFLLQSVHPTPQEGLCFAACFYCVAPCRAFLFGVCVVYVDGGGFLSWPNAGSPQVVWSANRGRLVRENATLSLTAAGDLLLRDGGGGGVVWSTNTSGRSVAGMAVTRSGNLVLLDGKNAAVWQSFDHPTDSLLPGQPLVEGMRLAPNASSTNWTASGQLYITVLSDGLYAFAESSPPQLYYQMTVTTNTTAGPGGRKTYMALTNGSLAIFAPSSSVNVSTPQPADGATNKTAAGEMEYVRLESDGHLKLYRYTGTEGWAMAQDLLQGQVGSCAYPTVCGAYGVCVSGQCTCPSATYFRQVDDRRTDLGCVPVAPISCASTQDHRLLALSN…
Zm00001d008966	GNA	1	80.0186	40.7712	28.0406	5.23465	7.18579	B_lectin + PAN + PK	Plasma membrane	Plasma membrane	+	+				MPGTAMEAPKRSCSPSGPRGCATPTFLFSIVLLLALAVAASVTDTILPGAGISGNQTLVSKNGDFELGFFLPGAGIHRFLGVRFKKMPGTSPTFWVGDRVVISDISAAALEVFGGSLCITEAGSTLWCSSVAGAGPGPPPPSAAAAAVLLGNGNLVVRDQADDASSRVLWQSFDYPGDSLLPGARLGLAAGTGANVSLTYRDFSHNGSLSVDPSRRNGFVLSTDGHPSSLGTFPDWMVTSQDNGTSLVLNPPPDSSNLTEFLQFSLGQVSLMRWSAAANTNSSGWVARWTFPSDCKSSGFFCGSFGACRSNGECSCVRGFEPSYPAEWSLGYFATGCSRPRSLPLSCQTNGQTEQDDSFILLDKLQGLPYNPQDGLAATDEDCKQACLSRCYCVAYAYH…
Zm00001d010700	GNA	5	43.96	30.6969	49.5641	70.3534	361.276	B_lectin + S_locus + EGF + PAN + PK	Plasma membrane	Plasma membrane	+	+				MVLTLLLLLLLPAASRARDTITPGQPLRGNDTLVSSGAGSFVLGFFSPPGSNSTYVGIWYAKVPVRTVVWVANRAAPVRGAASESAGATLSVSSECALAVADANATVVWRSLSSSSPRPCAARIQDDGNLVVSDQRGRVVWQGFDHPTDTLLPGMRLGVDFAAGANMTLTAWASPSDPSPSPVVAAMDTSGDPEVFIWNGPAKVWRSGPWDGVQFTGVPDTVTYKGMGFSFRFVNDGREATYSFQVRDAGIVSRLVLNSTGVGGGLMQRWTWLDVAGAWALYWYAPKDQCDALSPCGPNGVCDTNKVPACSCLPGFTPRSPASWAMRDGRDGCVRATPLDCANRTDGFLVLPHAKVPDATRAVVDFNSSLEQCRQRCLRNCSCTAYASANLTAAPGRRG…
Zm00001d011550	GNA	4	41.1241	23.1738	42.4232	125.38	163.969	B_lectin + PAN + PK	Plasma membrane	Plasma membrane	-	+				MKGLCKLGEWVLIPWATDTDNRSGNNDEDDIFDDRMVGNRSSIVVYHSASPISDAANKTAVWTANPDAPVNGRGSRISFRHDGSLALSGANGIGTTVWESKTSGAGLSVSLLDTGNLVISDDPSSSGGGRTLWQSFDWPVDTLVPSQRLTKDTTLVSRYFILYYDNDNVLRLRYDGPDASSIYWPNTDYAVFPNGRTSYNSSRVAVLDDAGVFLSSDNLQVVASDLGVPGIKRRLTIDPDGDLRIYSLESGPIDGGLDSDVGGYGAGVLHSRAMVDQHDWRQGCKPMFSVTTNCSQAALPEQRFKFVEVPHTDFYGHDMAYNNSVTFEYCKKLCLEMCSCAAFSYRPFEGHGKCYRKGSLFSGYTSPDFIGNIYLKVPIGFDPSARSVSARSSQGLACD…
Zm00001d011551	GNA	4	109.074	46.8318	53.8071	508.975	619.41	B_lectin + S_locus + PAN + PK	Plasma membrane	Plasma membrane	-	+				MLRILPRLTFLVSLLSLLLHSSASAPHTLGAGSSLSVEDHARPFLVSPDGTFSCGFLEAGDNAFSFSVWYSDAVNKTAVWTANPDAAVNGRGSRISFRDDGGLVLTGANGTTVWKSKTSGAGLSVSLLNSGNLVISDDPSSTGGGRTLWQSFDWPVDTLVPSQRLTKDTTLVSRYFILYYDNDNVLRLRYDGPDISSIYWPNPEDGVFPNGRTSYNSSRVAVLDDAGVFLSSDNLRVVASDLGVPGVKRRLTIDPDGDVRIYSLDPSTGGWTVTWAAMAQACSVHGQCGRNAICVYRPSLSCLCAPGHEMVDRHDWRQGCKPMFSDTTNCSQAALPPEQRFKFVEVPHTDFFGYDVAYNTSVTFEHCKKLCLEMCSCAAFSYRPFEGLGKCFPKGFLYN…
Zm00001d011832	GNA	1	834.444	333.32	222.142	453.174	206.674	B_lectin + PAN	Extracellular	Extracellular	+	-				MLQLALALCVLTAGGVVRAQPFDYPTAKPSTTWANTDASLPHHVTYADGSVARAALLRLNPAGYGPSYAFGFFCTNHLAPLCAEFLLGVAVVYCNSGGLMTSVVAGIPQVVWSANRGSPVGEGAAAELTAAGDLVLRSAQGAVVWSAAGTAGRSVAAMAVARDGNLLLLDARNNTVWQSFDHPTDALLVGQSLRPGARLVANSSAANWSPSRLYLTVAADDDSLSAYVDAEPPQRYYRLGFSGGGGGGGAYATYTNGSLAVFAAAAPAPTPLATIQLPAVGAGTVQYMRLEHDGHLRVYEWSSAGWAPVFDVLRLFPDDCAFPTVCGAYGVCTDMQCSCPDAANFRAVDFRRPNRGCVTVAPVAGCGGSHPPARLVSLPGLAYFNDPATSLRALERVSD…
Zm00001d012177	GNA		0	0	1.87932	6.64789	14.1416	B_lectin + S_locus + PAN + PK	Plasma membrane	Plasma membrane	-	+	At2g19130			MCVAEGVFIHSLSLSPAPVRYPVSRLEAALQRPAAMATRAGRLPTTPAPALLLLLAFPFLLQGVLPSRAGDTVAAGRPLSGGQSLVSKRGKFRLGFFRPGATDNSSQRWYLGIWYNQLSVHTTVWVANRGTPISDPESSQLSISKDGNMVVLDHSRSSTAVWSTNVTTGVSSTSTVGVIRDNGNLVLADASNTSAVLWQSFDHSGDTWLPGGKLGRNKRTGEVTRLVAWKGRDDPTPSLFALELDPRGSSQYLLNWNDSERYWTSGNWTGTAFAAVPEMTSTGASPVSDYTFGYVDGANESYFTYDVADESVVTRFQVDVTGQIQFLTWVAAAAQWVLFWSEPKRQCDVYAVCGPFGLCTENALPSCTCPRGFRERDLAEWMQDDHTAGCARNTALQPC…
Zm00001d012486	GNA							B_lectin	Extracellular	Plasma membrane	+	+	At3g51710			MASNRALFVLPMLLAVAVLLPEQIALSSADFPLGRQATVQLPPAPYQPGFAARAVVLDAKQGHRQPAFAAAVSAEAGAGRCTCSLVVLLGGVKVWASDHLEKFVPAALCRLELTEDGQLRLTDGAGKVGWLSGTAGQGVKALHLDRRTGNLVLLDAQNCTMWQSLDDPTDTFLRGQQRRLPVYLIAPTTNMAASSVFYSFELDGDRIATYVNFGDTRYSYWELAPPANRTMAAARLNGSGLGMLDLRGVTVAQITPPVKKPPVSFLALGGDGNLVMYYYDTRHQKFRASYKALGFCQLPLSCSVHEVCSSAGKCKDFSEYADRPAARAGNASSSNPREGAGDKARMVHLRGVTTVLRTASPLANVTLRECVVQCARNLSCNAALYVRDNAGVAAADHGV…
Zm00001d012609	GNA	3	37.2403	115.653	551.3	1406.27	508.014	B_lectin + S_locus + EGF + PAN + PK	Plasma membrane	Plasma membrane	-	+			PCW6g	MKDATRGTSAVEEALAAHRPRRAMASPLLCVLLYLLRHLTACHAARDIITPDRPLAGNETLVSGGEGNFALGFFTPPGANSTYLGVWYNKVSLRTVVWVANREAPIAGAVGDNPGATLSVSAGGTLAIAAGNRTVVWSVEPASRLASPAAQILDNGNLVLKDGAGGVAWEGFDYPTDTLLPEMKLGIDYVKGKNRTLTSWKSPSDPSPGPVAMVMDTSGDPQVFIWNGGEKVWRSGPWDGVQFTGVPDTATYSGFTFSFVNSAREVTYSFQVHNVSIISHLGVVSTGNYGLLQRSTWVEAARAWNLYWYAPKDQCDAVSPCGPNGVCDTNNMPVCSCLRGFTPRTPAAWALRDGRDGCVRSTPLDCRNGTDGFVTVRHAKVPDTERSAVDWSLTLDQCR…
Zm00001d013874	GNA							B_lectin + S_locus + EGF + PAN	Plasma membrane	Extracellular	+	-				MGLLPIHRIILLCFCSSSLLLPPPVSSDSRILPNKPLTVGSTLTSDDGTFALGFFSPSNPDKKHYYYVGIWYANIPKDNVVWVANRGTPIITDPSSATLALTNTSDLVLSSADGQTLWMANTSAAASSEPETTAGEATLDNTGNFILWSSQGAVLWQSFDYPADTLLPGMKFRVTHRRHALQQLVSWKGPQDPAPGSFSYGADPDELLQRFVRNGSRPYWRSPVLNSYLVARSYIGILKSTIYLTISKYDDGEVYMSFGVPGGSSSSTAMKIKMDYSGKIEILIWNTNILEWYVLEAQPMNECSTYGYCGPFGYCDNTELNATCKCLDSFEPISNEGRSNGSFTEGCRRKETLRCGEEDTSFLTLADMKIPDEFVHVKNRSFDGCTAECASNCSCTGYA…
Zm00001d016223	GNA	3	3.31358	14.2657	31.9358	31.7931	14.441	B_lectin + PAN + PK	Plasma membrane	Plasma membrane	+	-				MPRAERLLLLLMLSIPFSHAWSIDYPSPIANLPSTWANNKATIPYNATYADGSAIRAILVRQKPAGFGPSFGCGFICATAPCKGFLFAVFFMSTGDPVFNASATPPRIIWTANRYRPVKENASLQFSKDGDLVLRDLDGSLVWSTATSGSSVVGMNLAETGNLILFDVMGKTVWESFAHPTDTLLIGQSLWQGKRLSSTASTETNSTQGQFYLTLLGTGLYAFTDDADPPQLYYQKGFNVTDAILVQSKRNVSSDQAKNSTAYVSFLQGSFSAFLSFNSTAIKLFDISLPLPSSAQFMSLEDDGHLRVYGWDGASWRALADVLHVYPDECAYPTVCVAYGICSQGQCSCPGGSDDDDELFRQLDDRKPNLGCSLATPLSCDLIQYHKLIALPNVTYFSL…
Zm00001d016681	GNA	5	48.8752	44.6649	33.2599	89.7038	200.224	B_lectin + S_locus + PAN	Plasma membrane	Plasma membrane	-	+	At5g03700		SCW4g	MEAIVLVQLVAAAALISSLIGGAAGEAVAQELRQGLSVAHDQSYSQFQPVLADPTGVFALGFLRVNSTMLDLAVVHLPSAFPLWRAIPDRPAPWSTAASLSFDGGLFLTDRAADKVLWSTAATSASAGDRAVLLNTSNLQIQSTGGSSSPDVVWQSFDYPSETIVQSQNFTSAATLHSFDRRFAMRLGSNYFGLYIEPPPSSGGVAAAMYFKHTAMEAKAQIVAGGGPTYARVEPDGFLAMYQREGPPADVLSFDTFNRGVRALRRMTLEPNGNLRAYYWNGARWALDYTAINDNDRCELPTTCGAYSVCAEPSGSCECLANATDGSGCAAAVPASVASSLCGTTGGEVGGLYWAVRRQGVEPVNKELLRSEQAASATDCEARCERNCSCWGAVYSNGT…
Zm00001d018182	GNA	5	341.757	292.638	297.12	283.297	375.853	B_lectin + PAN + PK	Plasma membrane	Plasma membrane	+	+	At5g35370			MPTRLPLAAVLLLFLLLLLGAAAPTPARGGRVATELLAPGFTASYLLFIDTYGAFLASRSGAFHAVVYNPGQQQERFYLAVLHAPSKTCVWVANRAAPITDRAAPLQLTASGISAEDPNGTTIWSTPPFGEPVAALRLDDHGNLSLLDARNATLWQSFDRPTDSLLSSQRLPAGAFLASAASGSDFSEGAYRLDVTAADAVLTWMGSMYWRLSNDASSTVERSGTVAYMAVNGTGLYLLAADGGVVIQLSLPAAELRVVRLGYDGKLQIQSFASANSSKSPMDGGFVAPSDACALPLSCGALGLCTPKGCTCPPLFAASHDAGCTPSDGSTPLSVSSCGGGGGGSGNNSSPVSYLSFGSGVAYFANKLAPPTVSGGNVSSCQALCTSNCSCRGYFYDDS…
Zm00001d018185	GNA	5	352.73	322.849	363.084	411.036	498.968	B_lectin + PAN + PK	Plasma membrane	Plasma membrane	+	+	At5g35370			MPTRLPLAAVLLLLLLGAAAPTPARGGRVATELLAPGFTASYLLFIDTYGAFLASRSGAFHAVVYNPGQQQERFYLAVLHAPSKTCVWVANRAAPITDRAAALQLTASGISAEDPNGTTIWSTPPFGEPVAALRLDDHGNLSLLDARNATLWQSFDRPTDSLLSSQRLPAGAFLASAASGSDFSEGAYRLNVTAADAVLTWMGSMYWRLSNDASSTVERSGTVAYMAVNGTGLYLLAADGGVVIRVSLPAAELRVVRLGYDGKLQIQSFASANSSKSPMDGGFVAPSDACALPLSCGALGLCTPKGCTCPPLFAASHDAGCTPSDGSTPLSVSSCGGGGNNSSPVSYLSLGSGVAYFANKLAPPTVSGGNVSSCQALCTSNCSCRGYFYDDSSLSCYLV…
Zm00001d019275	GNA	2	20.382	34.4323	38.3738	19.0422	16.2708	B_lectin + S_locus + PAN	Extracellular	Extracellular	-	-				MADVHFTINAHKSCIIPRHPTTGFLSRSRVLGIQRLTNLQSSDGTFSSGFYEVYTHAFTFSVWYSKAAANKTIVWSANPDHPVHARRSALTLQKDDNMVLTDYDGAAVWRADGNNFTGVQRARLLNTGNLVIEDSGGNTVWQSFDSPTDTFLLTQLITAATRLVPTTQSRSPSNYIFRFSDLPQVSDIYWPDPDQNIYQDGRNQYNRTRLGMLTDSGVLDSSDFADDQALVASDVGPGVKRRLTLDPDGNLRLYSLNDSDGSWSVSMVAMTQPCNIHGLCGPNGICHYSPRPTCSCPPGYATRNPGNWTEGCVAIVNTTFCDRYDKRSMKFVRLPNTDFWGSDRQHLLSVSFRTCRYICISDCTCKGFQYQ
Zm00001d020703	GNA	4	79.5799	23.5861	80.9505	404.21	799.891	B_lectin + PK	Plasma membrane	Plasma membrane	+	+	At5g35370		SCW4g	MSPLPRALPRSLAFLGWVLLILLPARAADAGPLATELLRPPFTASNILYVDTGGAFLESTSGAFRAAVFNPGKQQDRFYLAVLHVPSATLVWSGNRDAPTTSSGPVNLTSQGITVSKPDGTLLWSTPSQLRSPVVALRLQDSGNLQLLGAGNATLWQSFDTATDTLLPGQLLRAGAYLSAATSATDLAEGNYRLGVTAADLVLTWQASTYWRLSNDARSYKDRNAAVASVSVNASGLFAVAADGGLVFRVNIGAAAFPVLSLGYDGRLRITSYALVNSSASLGSDFVAPANDCDLPLQCPSLGLCSPAAGNSSTCTCPPLFAASVTTPGACTPGDGSALASPALCQSNNSTVSPSYLALKSQVAYFATKFDPPIKAGVNHNACRGLCSTSCGCLAYFYD…
Zm00001d021434	GNA	5	0.479903	0	0	0.707366	29.8291	B_lectin + S_locus + PAN + PK	Plasma membrane	Plasma membrane	-	+				MAFPSSISIYTAALLLLLSTLGASDDRLVPGKPLMPGTIIVSDGGEFAFGFFAPSNSTPEKLYIGIWYNNVPRLTAVWVANRAAPAISSSAPSLVLTNDSNLVLSDVNGRVLWKTNTTAAGTGSSSPSPRTANATGSVAVLSNSGNLILRSPTGIMVWQSFDHPTDTLLPTMKIWRSYKTHEANNLVSWKDADDPSLGTFSLAGETDPFIQWFIRNGSVPEWRSNVWTGFTVSSQFFQANTSVGVYLTFTYVRTADEIYMVFTTSDGAPPIRTVMSYSGKLETSVWNRNSSEWTTLVVSPDYECSRYSYCGPSGYCDHSDATPTCKCLEGFEPVDREGWSSARFSRGCRRKEALRCGDGDGFLALTDMKVPDKFVRVGRKTFQECAAECSGNCSCVAYA…
Zm00001d021487	GNA	2	184.124	80.5956	161.792	252.076	117.04	B_lectin + S_locus + PAN + PK	Plasma membrane	Plasma membrane	+	+				MPRPPLHVLLLLLLSLRAAPCPCSAATTDTLSPGNGLAGTAATARLVSNNSKFALGFFKTDSKSPNTYLGIWFNKVPKLTPLWSANGESPVVDPATPELAISGDGNLVIRDQATGSVVWSTRANITSNNTTTVAVLLSSGNLVLRSSSNASDVFWQSFDYPTDTLFAGAKIGWNKRTGLNRRLVSRKNALDQAPGLYSLEMTESNGVGHLLWNSTVAYWSSGQWNGNYFGLAPEMIGAVMPNFRFVNTDEEIYFTYTLHDDAAIVHSALDVSGRGLVGFWLDSKQDWLINYRQPVAQCDVYATCGPFTICDDDADPTCSCMKGFSVRSPRDWELGDRRDGCARNTQLDCASDTGLTDRFFAVQGVRLPQDANKMQAATSGDECSGICLRDCSCTAYSYW…
Zm00001d021726	GNA	5	13.8623	2.60031	2.97234	7.9195	35.1038	B_lectin + S_locus + PAN + PK	Plasma membrane	Plasma membrane	+	+				MAAAGARLPLALLLPLFVTFFASPASATDTITANSSLSDGQTLVSAGGVFQLGFFTPASSTARFLGIWYMGLAPQTVVWVANREAPITGTTASLAINATGSLVLADPSGRVFWSSPQSNMSSTGSPVGAQLLDSGNFVLQGGGGAVLWQSFDYPSDTLLPGMKLGWDLTTGLDRHLTTWRSTGDPSPGDYTFGFDLRGVPEGFIRRDGTVPVYRNGPWNGLQFSGEPEMEPNNSNFQFEFVDNASDVYYTFLVDGGGGSGNGGVVSRFVLNQSSVQRYVWPPGGQGWSLYWSLPRDQCDNYAHCGAFGACDTSGGSAACACVHGFTPASPRDWELRDSSAGCRRLTRLNCTGDGFLPLRGVKLPDTTNATEDATITVDQCRQRCLANCSCLAYAASSIK…
Zm00001d021727	GNA							B_lectin + S_locus + EGF + PAN + PK	Plasma membrane	Plasma membrane	-	+	AT4G21390, AT1G91910	B120, -		MAHAAAAALALLVFFCAQARDAAVHVVDAAATLSQGQSLGATDKLVSAGGTFELAFFTPTGGDPSRRYLGVMYAQSTEQTVPWVANRDVPVSAGSAYSATVTAAGELQVLEGDRVVWRTDNSATTTSPGTAGGEQAANVTLTVLDTGNLQLAAGDGGPVIWQSFDHPADTFLPGMSITLDRRGGGAVRRTLFTSWRSPADPGTGDFTLGQDPLGSAQLYIWQTTGGQNTTYWRSGQWANTNFVGVPWRSLYVYGFKLNGDPNNGSGVMSYVFNTYNSSEYRFMLHSNGTETCYMLLATGDWETVWSQPTIPCQAYNMCGANAQCAAAADGGQAVCTCLTGFEPRNVSEYSNGNWTQGCVRSSPLPCGGEPNVSGAGAGAGVGVGFADLPGVKLPNFAAW…
Zm00001d021729	GNA	4	834.416	899.553	2302.66	5230.58	4371.19	B_lectin + S_locus + EGF + PAN + PK	Plasma membrane	Plasma membrane	+	+	AT4G21390, AT1G91910	B120, -		MVGTSPGGGVFCFSSMVSSPRLLFLLLAGASLCCVAAQKTDTLRQGESLSGAATLVSSPEGVFEAGFFAPDPKQPSRQYLGIWYHSISPRTVVWVANRVAPATSASPSLTLTVTGELRVLDGTAANGTADAPLLWSSNTTSRAGPRGGYSAVLQDTGSLEVRSEDGVLWDSFWHPTDTILSGMRITLQAPGRGPKERMLFTSWASETDPSPGRYALGLDPGNSGQAYIWKDGNVTYWRSGQWNGVNFIGIPWRPLYRSGFTPAIDPVLGNYYTYTATNTSLQRFVVLPNGTDICYMVRKSSQDWELVWYQPSNECEYYATCGPNAKCTASQDGKAKCTCLKGFHPKLQEQWNAGNWSQGCIRSPPLGCETNQSGDGFLPMGNIKWPDFSYWVSTVGDEP…
Zm00001d021737	GNA	4	79.241	76.2731	231.634	822.424	703.85	B_lectin + S_locus + PAN + PK	Plasma membrane	Plasma membrane	-	+	At2g19130			MAPVFFLLPLLLGQILLCAAGDTINSSTPLSGAQKIVSKGNKFTLGFYTPPQGTNTSSNQGNYYIAIWYSNIPLQTTVWMANPDLPVADPTTAALTIGSDGNLVLLDQSKNRQVLWSTNISTSSNSTIAVLQDGGSLDLRDATNSSMVYWRSIDHPTNTWLPGGKLGLNKTTGVSQRLVPWTNTANPSPGLFSLELDPRGTTQYLIQWNDSITYWSSGPWNNNIFSLVPEMTSGYNYDFQFINNATESYFIYSMKDNSIISRFIIDVDGQIKQLTWVPASQSWILFWSQPRTQCEVYALCGAYGSCNLNALPFCNCIRGFSQKVQSDWDLQDYSSGCKRRVPLQCQTNSSSSQAQPDKFYTMANVRLPDNAQTAVAASSQDCQVACLNNCSCNAYTYNS…
Zm00001d023394	GNA	1	60.7677	49.6567	24.6496	7.63658	8.3199	B_lectin + S_locus + PAN	Plasma membrane	Plasma membrane	+	+	At5g03700			MRQGKGDPAIAALAIAIAVVLLCVASSAVLAIDGAKAEEELPTQLLNGFAATHAAGSAATFEPVLYATSAVFALGFLRVGPASLDLAVVHLPSSFPVWRATPARLGDWSRPATLAFDDGTLVLAGPDGAVLWRTLNTVGDTVALLNSSNLVVQRYENPQPAWQSFDHPADTLVVDQNFTASSSPLVSANRRFTLQLGRTYMAMHMQFDAGQAQAATAPVYWKHTALEAHLENATAPPVYGRLDALGFFGLYLDGGGGQRVDVLSFDTFALNLTGVFRRMTLDDDGNLRAYYWTTGDSSAWTSDYKAIAERCELPTSCGAYGVCVPGNAQCQCLDSNGTSTAPPCHGEDTADLCSTASSNGARQLGFDVVRRTRVSVAYKEELPFRTNTTADGCELACAG…
Zm00001d023503	GNA							B_lectin + S_locus + PAN + PK	Plasma membrane	Plasma membrane	-	+				MIYTGGKLIDGNTLVSAGGSFTLGFFSPPGEPTKRYLGTWFSFSAPTPDATAIYWVANRDRPLAGTSSALVLTTSGTLLLLDGTTNDTVWSSGSTASTPPAGARILDSGNLVVVQGRNNSTALWQSFDHPCNSLLPGMKIGQNLWNGDEWYLSSWRSPTDPGPGSYRYITELGGGTPENVMRDSGSAKRYRTGPWNGERFDGVPEMASYSSYFTYQVTVSPSEATYSYNAKPGAPYSQLRLGDAGVVQRLVWDAGSRQWNSFLKEPRDDCDDYAHCGAFGLCDRNAASTSLCTCFKGFVPAVPKEWSLREYSDGCRRNVSLDCGGSNRSRSSTDGFQVVPLVKLPDTQNATVDMAISLDECGLRCLANCSCVAYAAADATGGGCIIWTDSFTDLRFVEK…
Zm00001d023511	GNA	1	75.5775	46.8821	13.8953	6.80127	21.7487	B_lectin + S_locus + PAN + PK	Plasma membrane	Plasma membrane	-	+				MLLLQVILLGLLSLHAPSNSATATDTVYPGNGLAGSSSKLVSNNSKFALGFFRMDNKSFNYATNPYTYLGIWFNKVPKLTPLWSANGESPVMDPASPELAIAGDGNLVILDQATRSVIWSTHAKTTTNDTVAVLQNNGNLVLRSSSNSSTVFWQSFDYPTDTFFAGAKIGWDKVTGLNRRLVSRKNLIDQAPGLYTGEIQKNGVGHLVWNSTVEIESTGLWNGQYFSSAPEMIGNTDNITTFEYVNNDKEVYFTWNLHDETAIVLSQLGVDGQGMVSLWIDKDWVVMYKQPVLQCDAYATCGQFTVCDEGENEGPICNCMKGFSVSSPRDWELGDRRDGCKRNTPLHCGRSRNTDKFYDVQKVMLPQDEMKIQAATSDEDDCSRVCLGNCSCTGYSYRE…
Zm00001d023524	GNA	1	50.8357	41.6741	19.8853	16.5426	49.4007	B_lectin + S_locus + PAN + PK	Plasma membrane	Plasma membrane	-	+				MLLLQVILLGLLSLHAPSNSATATDTVSPGNGLAGSSRLVSNNSKFALGFFRMDSKSFNYATNPYTYLGIWFNKVPKLTPLWSANGESPVMDPASPELAIAGDGNLVILDQATRSVIWSTHANTTTNDTVAVLQNNGNLVLRSSSNSSTVFWQSFDYPTDTFFAGAKIGWDKVTGLNRRLVSRKNLIDQAPGLYTGEIQKNGVGHLVWNSTVEIESTGLWNGQYFSSAPEMIGNTVSITTFEYVNNDKEVYFTWNLQDETAIVLSQLGVDGQGMVSLWIDKDWVVMYKQPVLQCDAYATCGPFTVCDEGENEGPICNCMKGFSVSSPRDWELGDRRDGCTRNTPLHCGRSRNTDKFYAPQNVMLPQDAMKMQAATSDEDDCSRACLGNCSCTGYSYGEG…
Zm00001d025035	GNA	4	76.2073	61.8507	140.683	194.376	291.829	B_lectin + PAN + PK	Plasma membrane	Plasma membrane	+	-	AT5G60900	RLK1		MAAPLLFPLLLLLLLLSSSTTPLQAQQNFTQGSSLTPQGPTTSWLSPSGDFAFGFQPIEGNTSFYLLAVWFNKIGNLTVTWYAKTNDPDPAPVQAPSGSRLQLNSNGALSLQDSAGTEVWNPQVVGASYAAMLDSGNFVLAAADGSALWESFKYPTDTILPTQVLTTGMSLRSRIIPTDYSNGRFLLGLQSTGASLYTVAVPSGYEYDPYWSMDVNTTNLVFDASGVIYIGNRSEITSWVVSSIADYYLRATLDPDGVFRQYMYPKKNSNQSNQAWSVVDFKPPNICGAQLTNVGSGICGFNSYCTWNGANNQSTCKCPEQYSFIDDERKYKGCKPDFQPQSCDLDEAAALMQFKVIPMSHVDWPLSDYEQYSPITKDQCQQLCLTDCFCALAVFHDED…
Zm00001d025065	GNA	5	11.849	3.70614	3.89756	11.6394	51.0609	B_lectin + PK	Plasma membrane	Plasma membrane	-	-				MDGAVASMRPVLENSANLYRTLFGFYTTDGHSFVLSVVFLGPKAPVIWSANPDSPVSSSAVLNFTREGDLLLHEAGGGTVIWSTGTSGMSVAVAGMKLDDLGNLVLFDRKNSSAWQSFDNPTDTLVLGQSLCRGNSSLSAKPSITKWPGARVYLSAELDGLQYSFKPAAYTQLFKATAASTNATPNCYAFVNGSFGFPDKVFSLPLAGSMQLMSDGQCSCPSSSYFRLRSERHPDAGCVPLASSASCDHRLIPLDNVSYFSYTTFQSSATPGISQALCLRSCLLDCSCRVVLFQRSLSFGEDGMSFGGDAGNCLLLSEQKLIMFAEGSANNVSALFSIQDGHSAERRNIVIITSTVAGISVASVLGFAVLWKKWREEEEPLFDGIPGTPSRFTFHELKA…
Zm00001d025383	GNA							B_lectin + S_locus + PAN + PK	Plasma membrane	Plasma membrane	+	+				MHLLAALCGILFSLLHTPTCSAATDTLSRGGSLAGDARLVSSNGKYALGFFETNSNNPTHNASNSYLGIWFHKVPKLTPVWSANGDNPVSSPASPELMISDDGNLVIIADDGTKVWWSTQANITANTTVVVAVLLADGNLVLRSSSNSSDVFWQSFDHPTDTLLPGAKLGRNKVTGLDRRFVSRRNSNDQAPGVYSMGLGPGALDESMRLSWRSTEYWSSGEWNGRYFDAIPEMSGPRYCKYMFVTSGPEFYFSYTLVNESTAFQVVLDVSGQWKVRVWDWDRNDWITFSYSPRSKCDVYAVCGAYGICSNNAGPLCSCMKGFSVRSPEDWEMEDRAGGCIRDTPLDCNATSMTDKFYPMPFSRLPSNGMGLQNATSAESCEGSCLSSCSCTAYSYGQG…
Zm00001d025388	GNA							B_lectin + S_locus + PAN + PK	Plasma membrane	Plasma membrane	-	+				MHLLAVLCGVIFSLLQLHTPTRSAATDTLSRGGSLAGDETLVSSNGKFALGFFETKSDNSTHNASNSYLGIWFHKVPRLTPVWSANGDNPVSSTASPELMISDDGNLVIIAATGTKVWSTQANITANISVVAVLLADGNLVLRSSTNSSDVFWQSFDHPTDTLLPGAKLGRNKATGLDRRFVSRRNSNDQAPGVYSIGLAPDGVDESMRLSWRSSTEYWSSGEWNGRYFNGIPEMSDPSYCNYMFVSSGPEFYFSYTLVNESTAFQVVLDVSGQWMVRVWDWDRNDWITFSYSPRSKCDVYAVCGAYAVCSSNADPVCSCMKGFSVRSPEDWEMEDRTGGCIRDTPLDCNATSMADRFYPMPFSRLPSNGMGIQNATSAKSCEGSCLSSCSCTAYSYGQ…
Zm00001d025390	GNA							B_lectin + S_locus + PAN + PK	Plasma membrane	Plasma membrane	+	+				MHRLRHFALHVLLLVIAHAPLPSAAVDTLRPGQALAGWKKLVSANGKFALGFFQLQPGSSYYLGIWFDKVPVLTPVWTANRDNPVSNSTSPELTISGDGNMAVVLAESGTTTIVWSTSTQANATSNDTVAVLLDSGNLVLRSSSNSSLVFWESFDYPTDTQLPGVKIGWDKVTGLDRRLVSRKNSVDLSSGLYSSTMGHDGVARMLWNSSAVYWSSTWTGGFFSAIPEMSAGSPLANFTFVDNAREVYFTYNIFDESTVIRTTLHVSGRNQVRVWTGQDWMTVNNQPAHQCDVYAVCGPFTVCTDSASDADSCDCMRGFSVRSPAEWAVEDRTGGCVRNTPLNCAADGRNRTGVPADKFYSMPGVRLPQNGRQAMPNASSAIECAQACLSSNNCSCTAY…
Zm00001d025391	GNA							B_lectin + S_locus + PAN + PK	Plasma membrane	Plasma membrane	+	+				MHRLRHFALHVLLLVIAHAPLPSAAVDTLRPGQALAGWKKLVSANGKFALGFFQLQPGSSYYLGIWFDEVPVLTPVWTANRDNPVSNSTSPELTISGDGNMAVVLAESGTTTVWSTSTEANATSNDTVAVLLDSGNLVLRSSSNSSLVFWESFDYPTDTQLPGVKIGWDKVTGLDRRLVSRKNSVDLSSGLYSSTMGHDGVARMLWNSSAVYWSSTWTGGFFSAIPEMSAGSPLANFTFVDNAREVYFTYNIFDESTVIRTTLHVSGRNQVRVWTGQDWMTVNNQPAHQCDAYAVCGPFTVCTDSASDADPSCDCMRGFSVRSPAEWAVKDRTGGCVRNTPLNCAADGRNRTGVPADKFYSMPGVRLPQNGRQSMPNASSAIECAQACLSSNCSCTAYS…
Zm00001d025393	GNA							B_lectin + S_locus + PAN + PK	Plasma membrane	Plasma membrane	+	+				MHRLRHFALHVLLLVIAHAPLPSAAVDTLRPGQALAGWKKLVSANGKFALGFFQLQPGSSYYLGIWFDEVPVLTPVWTANRDNPVSNSTSPELTISGDGNMAVVLAESGTTTVWSTSTEANATSNDTVAVLLDSGNLVLRSSSNSSLVFWESFDYPTDTQLPGVKIGWDKVTGLDRRLVSRKNSVDLSSGLYSSTMGHDGVARMLWNSSAVYWSSTWTGGFFSAIPEMSAGSPLANFTFVDNAREVYFTYNIFDESTVIRTTLHVSGRNQVRVWTGQDWMTVNNQPAHQCDAYAVCGPFTVCTDSASDADPSCDCMRGFSVRSPAEWAVKDRTGGCVRNTPLNCAADGRNRTGVPADKFYSMPGVRLPQNGRQSMPNASSAIECAQACLSSNCSCTAYS…
Zm00001d025394	GNA							B_lectin + S_locus + PAN + PK	Plasma membrane	Plasma membrane	-	+				MAVVLAESGTTTVWSTSTQANATSNDTVAVLLDSGNLVLRSSSNSSLVFWESFDYPTDTQLPGVKIGWDKVTGLDRRLVSRKNSVDLSSGSPLANFTFVDNAREVYFTYNIFDESTVIRTTLHVSGRNQVRVWTGQDWMTVNNQPAHQCDVYAVCGPFTVCTDSASDADPSCDCMRGFSVRSPAEWAVEDRTGGCVRNTPLNCAADGRNRTGVPADKFYSMPGVRLPQNGRQAMPNASSAIECAQACLSSNCSCTAYSYGGEDGCSLWHGELVNVAADELESGKGNRIAMVAGVAALVLVLVVVVICSRRNNGKWWSRPIADSDKGGSVVGIATFKYADLQDATKKFSEKLGAGGFGCVFKGRLAGDSTDIAVKRLDGALGNAQGEKQFRAEVNSVGFI…
Zm00001d025396	GNA							B_lectin + S_locus + PAN + PK	Plasma membrane	Plasma membrane	+	+				MHRLRHFALHVLLLVIAHAPLPSAAVDTLRPGQALAGWKKLVSANGKFALGFFQLQPGSSYYLGIWFDEVPVLTPVWTANRDNPVSNSTSPELTISGDGNMAVVLAESGTTTVWSTSTEANATSNDTVAVLLDSGNLVLRSSSNSSLVFWESFDYPTDTQLPGVKIGWDKVTGLDRRLVSRKNSVDLSSGLYSSTMGHDGVARMLWNSSAVYWSSTWTGGFFSAIPEMSAGSPLANFTFVDNAREVYFTYNIFDESTVIRTTLHVSGRNQVRVWTGQDWMTVNNQPAHQCDAYAVCGPFTVCTDSASDADPSCDCMRGFSVRSPAEWAVKDRTGGCVRNTPLNCAADGRNRTGVPADKFYSMPGVRLPQNGRQSMPNASSAIECAQACLSSNCSCTAYS…
Zm00001d026382	GNA	1	41.9131	34.84	30.534	20.8212	14.6627	B_lectin + S_locus + PAN + PK	Plasma membrane	Plasma membrane	+	+				MMYVPIFILLVVLSSLCQSDDQLTHTKPLFPKETLISAGGDFALGFFSPTSSSNKLYIGIWYNNVPERERTVVWIANRDSPVTTPATSVKLAVTNDSELVLSDSQGHIFWMATSSTSGGAGAFAVLLNSGNFVLRSPNGTDVWQSFDHPTDTVLPTMRSMIRYRSQPATGLFAWKSPDDPSTGDISSGMDPASSNVQVFIWNGTLPYYRSSFFNDVPASGGTYQANNTSVTYQWMMVDTGDEIYYTFTVLAGSPYMHFSLHHTGKMRLLVWENSTSSWVLISEEPSVGCDLYASCGPFGYCDLTKAMPTCQCPDHFELVDSLNFSRGCQRKEELKCGTESYFMTMPNMKIPDKFLHIRNRTFDQCAAECARNCTCMAYTYATLSTASTTGDASRCLVWT…
Zm00001d026383	GNA	1	22.6805	14.9011	9.1695	10.7612	8.07018	B_lectin + S_locus + EGF + PAN + PK	Plasma membrane	Plasma membrane	+	+				MAVLNLLALIIATLLLLFRRTSGAGISPADTLNSGGNVTDGETLVSAGGTFTLGFFSPSTTVLTKRYLGIWFTASGTDAVLWVANRETPLNNTSGVLVMSSRVGLRLLDGSGRTAWSSNTTGASTSSVAQLLGSGNLVVREKSSNAVFQWQSFDHPQNTLLAGMRFGKNLKTGMEWSLTSWRAQDDPATGDYRRVMDTKGLPDIVTWHGNAKKYRAGPWNGRWFSGVPEMDSGYKLFSVQMVDGPDEVTYVLNTTAGIPFTRVVLDEVGKVRVLMWLPTSRVWKEYPWLPRDACDEYTSCGAFGLCNVDAAPTPSCSCAVGFSPVNASEWSRREASGGCQRDVPLECAAGNGTAVTDRFAPVHGVKLPDTDNATVDMGATLEQCKARCLANCSCVAYAP…
Zm00001d028245	GNA							B_lectin + S_locus + PAN + PK	Plasma membrane	Plasma membrane	+	+				MLLILVFLLSFSSLDLQISGATTDTLTLGQSLPWNQTLVSKGGNFELGLFSPGNSKKHYIGIWFKKVSKQTVVWVANRDSPILDPSASRFTLSNRGELLLHATPSNTLLWSSNASSPSPRTTVATLQDDGNLVVRSNASSALVAWQSFDHPTDTWLPGARLGYDRARGVHSFLTSWTDADNPAPGAFSMEIDPRGQAKFDLLAGGTHQYWTTGVWDGEVFENVPEMRSGYFEGVTYAPNASVNFFSYKNRVPGIGNFVLETNGQMQRRQWSPEAGKWILFCSEPHDGCDVYGSCGPFGVCSNTSSAMCECPTAFAPRSREEWKLGNTASGCVRRTKLDCPNDGFLKLPYAVQLPGGSAEAAGAPRSDKMCALSCLRDCSCTAYAYEAAKCLVWNGELVS…
Zm00001d030171	GNA	3	255.644	295.823	854.161	1127.23	875.692	B_lectin + S_locus + EGF + PAN + PK	Plasma membrane	Plasma membrane	+	+			PCW6g	MASVSLLLCLLLLVPPLAAAQQQMSSFSANNSTWSPTNSNRILVSINREFAAGFVASTSARDRYHFAVWVVGSNSTDKAFIWYAHDTASYSPYEGNDTSKLAIDAAGRLTWTAGGNNNATIWSLPPPANTTTTPAVLQLNDTGSLVYGAAWSSFAEPTNTLMPGQAMPKGGNDTTLQSVNGHYRVVNSATLQFNNSMMYANISGGSALLNLTADGKLQFSGSQLIASDQGTTNRVRRLTLDDDGNLRLYSLVPKTRKWLVVWQVVQELCTIRGTCANGRICVPVGVDSTTCVCPPGYRNATPTDPCTPKKRYSGRGDDDTFVRMDFVSFSGAANSSASDPGPLMTKLTPQNLADCERLCRSNSTCVAFGYKFGGDRTCLQFTGLVDGYWSPATEMSTYL…
Zm00001d030555	GNA	5	18.0111	16.8834	12.1535	26.4164	47.4125	B_lectin + PAN + PK	Plasma membrane	Plasma membrane	+	-	AT5G60900	RLK1		MAAPLLLPLILLLSSTPPLQAQQNITQGSSLTPQGPTTSWHSPSGDFAFGFQPIDGNTSVYLLAIWFNKIGNLTVTWYAKTSDQDPVPVQVSSGSRLQLNSNGALSLQDSTGTEVWSPQVVGASYAAMLDSGNFVLAAADGSTRWESFKYPTDTILPTQVLTPGMSLRSRIIPTDYSNGRFLLDLQSTGVSLYTVAVPSGYKYDPYWSMDVNTTDLVFNATGAIYIGNNTEITSWVISSIADYYLRATLDPDGVFRQYMYPKKDNNQSNQAWSAVDFKPPNICGAQLTKIGSGICGFNSYCLWNGANNQSTCKCPDQYSFIDGERKYKGCKPDFQPQSCDLDEAAIMTQFMLMPTSLVDWPLSDYEQYTSITKDQCQKLCLTDCFCAVAVFHSEDNTCW…
Zm00001d031230	GNA	4	264.187	176.797	281.729	438.051	747.125	B_lectin + PAN + PK	Plasma membrane	Plasma membrane	-	+	At5g35370		SCW4g	IVYLRKKKKEWFHLLRVPAPAQQLAKSTLFAPFPFLALSAFLQIVNRNHSGRQRQAQTRAPPMSMASPVLHRLILLSVSLSVAIAAADASAVPVEYLYPTLNLTYIHSIDTDGVFLRSPSANFSAAIYNAAGAGQSSDDSQSRFFFSVLHTASRTPVWTATATGSTMFNSIVLSVAPTGLALYDPSAAKPDDPAWSTPRLREPVVALRLLDTGELALIDSRNTTLWSSFDRPTDTLLPGQPLLLGSPLTSSASDRDLSPGAYRLVLTPNDALLQWATNASTAFLTYWSMSSDPAALQDSNQAVAAMAVNSSGLYLFAANGRDTVYRLLFPSPPASKSESRILKLYPSGSLRAVALTAAATVSTIWAAPANDCDLPLPCPSLSLCTSDANGSTCTCPEAF…
Zm00001d031359	GNA							B_lectin + S_locus + PAN + PK	Plasma membrane	Plasma membrane	-	+				MFRPVRDARRKCSDSEEFLLPQLVFSPISRFPQLLTQPLSGDITIVSKEGNFELGFFSPGNNGNCYVGIWFRTISKRTVIWVANRDIPVSNASSPELAITMDGNLVLNSLGAPICRELKFRWTTKDVSVITRVILSINGQLQRLTWSNDSEEWITGWYFPAALCDVYSVCGPFGVCRTGSDEQCFCLPGFRPASARSWRLGAWSQGCVRQTDIQCAESNISSGIKESDAFLKITNIKFSQNPVKLKVQSMEGCRSICLSTCSCTAYAHKQDCNIWNIELWDLKQLPNGNTDGSDMYIRLAASDHVVQDSEKKAHHLRLIVLFAVLGSIFMALCALSITVKMFQRTSSRKAFSDNYSLVVYDYSFLRHCTKNFSDRVGQGSFGSVFKGLLPDSKPIAVKK…
Zm00001d031377	GNA	5	10.9351	3.62256	4.60712	15.7455	26.2266	B_lectin + S_locus + PAN + PK	Plasma membrane	Plasma membrane	-	+				MALLKKTHPSITLPIFLLHFCAITFGATDTISRTQPLSGDITIVSKEGNFELGFFSPGNNGNFYVGIWFRTISKRTVIWVANRDIPVSNASSPELAITMDGNLVLNSLGAPIWSSNSTRKSSRSSTAVLLDSGNLILRDQYNSSDIFWQSFDHPTDTVVSGQWFGIDKITYEYQDSVSWKNQEDPAPGPFSYHADLVTMSQYVSIWNHSEVYWQSGNWTGKAFTSIPGMPLKSDYIYDFVNNSRELKFRWTTKDVSVITRVILSNNGQLQRLTWSNDSEEWITGWYFPAALCDVYSVCGPFGVCRTGSDEQCFCLPGFRPASSRSWRLGAWSQGCVRQTDIQCAESNISSAIKESDAFLKITNIKFSQNPVKLKVQSMEGCRSICLSNCSCTAYAHKQD…
Zm00001d031398	GNA	5	12.96	3.35973	5.22188	11.0116	22.1039	B_lectin + S_locus + PAN + PK	Plasma membrane	Plasma membrane	-	+				MALLKKTHPSITLPIFLLHFCAITFGATDTISRTQPLSGDITIVSKEGNFELGFFSPGNNGNFYVGIWFRTISKRTVIWVANRDIPVSNASSPELAITMDGNLVLNSLGAPIWSSNSTRKSSRCSIRDQYNSSDIFWQSFDHPTDTVVSGQWFGIDKITHEYQDRVSWKNQEDPAPGPFSFHADLVTMSQYVSIWNHSEVYWQSGNWTGKAFTSIPGMPLKSDYIYDFVNNSRELKFRWTTKDVSVITRVILSINGQLQRLTWSNDSDEWITGWYFPAALCDVYSVCGPFGVCRTGSDEQCFCLPGFRPASARSWRLGAWSQGCVRQTDIQCAESNISSGIKESDAFLKITNIKFSQNPVKLKVQSMEGCRSICLSTCSCTAYAHKQDCNIWNSELWDL…
Zm00001d031785	GNA	5	20.7627	25.9397	15.7275	7.0804	40.6712	B_lectin + S_locus + PAN + PK	Plasma membrane	Plasma membrane	-	+				MSLAAAVATALAVLAYSCTAADPDTVSARRPLRGNGTVVSAQGKFELGLFSPGASGRFYLGIWYKNVPVQTVIWVANRASPLSSAASAELRVSPDDGNLELVGLIQNSASPAVAWSSNMSLSPSTSPSPSPGSNIAVMRDDGNLVLLGGDDSSTVLWQSFDHPTDTLVPYAWLGENKVTGEYQTLTSWRDAEDPAPGMFTDTVDRNGSSEFFLLWNGSRAYWRSGVWTGSVFANLPEAVNNVLFNQTYVDTPAYRRVTSVLYDNATITRMVLDLTGQTKQYIWVPGSQSWQFFWAAPTVQCDVYSLCGAFGVCSRRSQPPCQCPRGFAPAAERDWGLSDWSAGCQRSAPLLCGGNGRPTDDGFLELPDMKLPDDPLAVSVRTRAECESACLNNCSCQAY…
Zm00001d032161	GNA							B_lectin + PAN	Extracellular	Plasma membrane	-	+	At5g03700			MVYSGLVHTDRAADKVLWSTAATSASAGDRAVLLNTSNLQIQSTGGSSSPDVVWQSFDYPSETIIQGQNFTSAATLYSFDRRFAMRLGSNYFDLYIEPPPSSGGVAAAMYFKHTAMEAKAQIVADGGPTYARVEPNGFLAMYQREGPPADVLSFDTFNRGAVRRRGVEPVNKELLRSEQAASATDCEARCERNYSCWGAVYSNGTGVCYVMDYPAQLLVAGDDRKMGYFKIRSLEEEGTRGHGGGRASGVKAALLVVGVAAVVAAAAFGAYRVWDRRRRSAVDARRQMGAADDGLSPGPYKNLGSFSSVELTNSFRR
Zm00001d032408	GNA	4	4.13222	7.69759	37.5793	91.5013	279.577	B_lectin + S_locus + EGF + PAN + PK	Plasma membrane	Plasma membrane	-	-				MRRRRCPLLAAVLFLFLLPLFHRHHAASGTDTDTVTLAAPLMGNRTLVSAGSAKYVLGFFAPDPESGRAYLGIWFNGIPARTVVWVANRESPVLGGVGAAALRVLANGSLAIVVVNETDTANYDQQPVVWATPPPATASGSNATAQLLDNGNLVLRVPGAGVVWQSFDHPTDTLLPGMKLGIDFRTGLDRRMVSWRAAGDPSPGEYSFRLDPRGSPELFLYRGSARVYGSGPWNGYQFTGVPNLKSNSLLTFRFVSAADEAYYSYGVVDSAAVLTRFVLDSSGQIQRLMWIDMTRSWSLFWSYPLDECDGYRACGPYGVCSVERSPICGCAPGFDPRFPKEWALRDGSGGCRRRTDLACAGDGFAALTNMKLPESANATVDMSLTLDQCREACLRNCAC…
Zm00001d034781	GNA	4	375.157	367.044	661.319	1121.38	1501.28	B_lectin + PK	Plasma membrane	Plasma membrane	+	+	At1g34300, At2g41890		SCW4g	MRPLRRSSGGLAALGCCLFLLPLLSRGADMPLGSTLSPGNSATWTSPNSTFSLGFTASASSPSLFVAAITYAGGVPVWSAGNGAAVDSGSSFRLSSNGDLQLVNGSGAVLWSSNTGGQNVSAAAVQETGNLVLKDKTGAALWQSFDHPTDTVVMSQNFTSGMNLTSGSYAFSVDRATGNLTLRWTGAGSTVTYFNRGYNTSFTGNKTLTAPTLTMQTNGIVSLTDGTLTSPAVVAYSSNYGESGDMMRFVRLDADGNFRAYSAARGSNAATEEWSAVADQCQVFGYCGSMGVCSYNGTSPVCGCPSLNFQLSDPSKPRAGCTRKLELASCPGNSTMLELDNTQFLTYPPEITTEQFFVGITACRLNCLSGGSCVASTALSDGSGLCFLKVSSFVSGYQS…
Zm00001d035450	GNA							B_lectin + PAN	Plasma membrane	Plasma membrane	-	-				DQLTQANPLSPGDVLISKDGAFALGFFSAGNYNKSLYVGIWYNKVPEHTVVWVANRDSPVIAPSRAKLAITGKPELVLSDSQGRIRWTTTNSAAAGGADAFAVLLNSGNFVLQTPTGETIWQSFDYPTDTLLLTMRLLLNHKGQVPTRIISWKSPDDPSTGNFSYGIGPNWNLQFFTWYGTLPYSRSNALNDASMSSGMYLSSGASIVYQAIVDTGNRLYYIYTVSEGSPYTRIWLDYTGDVPTCRCPEGFEPIDGVNYSRGCRRKEALRCGKEDSFVTLPAMKVPDKFLYLRNRSFDQCAAECSRNCSCVAYAYDTLSLGDSNGDTSRCLVWTGDLIDMEKASFHGNLYLRIAGSPGTQLSSLPHVPFTRSDICASVV
Zm00001d035588	GNA	2	5.86929	14.4345	48.9969	53.1096	4.46397	B_lectin + S_locus + PAN + PK	Plasma membrane	Plasma membrane	-	+				MPPPNNRLCVALAIALVVFSSLHTPAAASAADGDTLAAGQALAAGDKLVSRNGKFALGFFQFRQALPGGGGTGTSASVVVPSPGWYLGVWFNKIPVCTPVWIANRDRPITESELKVAQFRVASTDGNNKLLVVATSNTNTSADNSIIIVANTTTNGSSVHVVLMDTGNLVLLPQTEALLSSASAPAASSSSSSSSSSSSSSSLWQSFDYPTDVGLPGAKIGWTKLAGGRYFSRQFISKKSLVDPSPGSYSISIDTNGFMQLTRNAPSVQYWSWTSGSLGNLVTALTALIDMDPRTKGLLKPGYVATADEVYFTYSITDESASVFVPVDVTGQLKLMLWSDSKRAWETIYAQPSDFCVTSAVCGPFTVCNGNSGPSPSSFCTCMDTFSIRSPRHWELGDL…
Zm00001d035949	GNA		14.1973	3.35978	6.73259	1.31371	6.64882	B_lectin + PAN + PK	Plasma membrane	Plasma membrane	+	-	AT5G60900	RLK1		MGSHLLLPFLLLLSSPYVQAQQRITLGSSLTTQGPNSFWLSPSGDFAFGFRSIEGNTSSYLLAVWFNKISDKTVAWYAKTADPDPALVQVSSGSCLELTSSGALSLQDPTGKEVWNPEVVSATYASMLDTGNFVLAAADGSSKWGTFDNPADTILLTQVLTPETKLHSRTIATDYSNGRFHLNLQNNGVFFYATAVQSDPQHEYNWSMPGNATNLVFNATGMIYITLDNGTQVKITSGKTSSIADYYHRATLDPDGVFRQYMYPKKFSNHLYTQAWSVVDFKAPNIYIPRRSIAETQVSSGTCGFNSYSKVDVINNQTTCVCVPQYTFKGGSKGCTPDFQQPSCDLDEAGATKQFQLVTMSNVDWPQCDYEQHDNIPNNQCQQLCLTDCLCAVAVFRDS…
Zm00001d037783	GNA	5	35.9006	10.0767	5.58742	19.0445	148.538	B_lectin + S_locus + EGF + PAN + PK	Plasma membrane	Plasma membrane	+	+				MPRPLAALLSTACILSFFIALFPRAASSRDILPLGSSLVVESYESSTLQSSDGTFSSGFYEVYTHAFTFSVWYSKTEAAAANNKTIVWSANPDRPVHARRSALTLQKDGNMVLTDYDGAAVWRADGNNFTGVQRARLLDTGNLVIEDSGGNTVWQSFDSPTDTFLPTQLITAATRLVPTTQSRSPGNYIFRFSDLSVLSLIYHVPQVSDIYWPDPDQNLYQDGRNQYNSTRLGMLTDSGVLASSDFADGQALVASDVGPGVKRRLTLDPDGNLRLYSMNDSDGSWSVSMVAMTQPCNIHGLCGPNGICHYSPTPTCSCPPGYATRNPGNWTEGCMAIVNTTCDRYDKRSMRFVRLPNTDFWGSDQQHLLSVSLRTCRDICISDCTCKGFQYQEGTGSCY…
Zm00001d037810	GNA	2	160.726	117.172	242.475	218.063	140.137	B_lectin + S_locus + PAN + PK	Plasma membrane	Plasma membrane	+	+				MNPLLTLLLLLITSLHAPPCSSASTTTAATATDTLAAGQALASGDRLVSRNGKFALGFFQPTTAVVAGGKSGNITSSPNWYLGIWFNTIPVLTTVWVANRETPIPGPSLKHARLQISSDGKSLAILINQASPGGTMLWSTPSPSAANWSSGASSNTAVLMDTGNLALLGAESPSSSNNNVTTLLWQSFDYPTDVVLPGAKFGRNKVTGFSRQGVTRKSLIDPGLGSYSVEIDASGVVLKRRSPSSVVYWRWSSSSTSTLKLIPILKSILDLDPRTRGLIDPTYVDDSQEEYYMYTSLNESSSRLTFVSLDISGQIKMNVWSHALQSWQAIYSQPADPCTPYATCGAFTTCNGGTTSSSSSFCDCMPGFSRKSPQDWELDDRAGGCVRNTPLHYCTTTSE…
Zm00001d037973	GNA	3	76.2478	110.587	227.023	263.355	189.792	B_lectin + S_locus + EGF + PAN + PK	Plasma membrane	Plasma membrane	-	+			PCW6g	MAALALALALASITLSTLAPRPLPLMTSAFSYTAPHDTIPRKSRLIVEEYKTRILRSSPDGTFSCGFHQIYDGAFTFSVWYTNSSTDGDDTAAIVWSANRGRPVHAWGAAVALRKDGSMVLTDYDGTVVWQAQESSSSPDAGAAQYAQLLDTGNLVLKNSSGAIVWQSFDSPTDTFLPTQRIAETSRLVSTTELQLPGHYAFRFSDQSILSLIYDDTNVTSVYWPDPDFQYYENSRNLYNSTRIASLGPSGDIFSSDFANSQHELAAADRGAAGILRRLRLDRDGNLRLYSLNSSDGTGTWSVSWVAESQPCKTHGLCGPYGICHYSPAPVCSCPPGYQMTNPGNWTQGCRPAVDIPCDDDGEQNLTFLELRNTDYWGSDQERIEKVSLETCKDTCLRD…
Zm00001d039789	GNA							B_lectin + S_locus + PAN + PK	Plasma membrane	Plasma membrane	-	+				MSVALPIAVVGLLALVGACRSAATDTLSPRQVLAGNDTLVSNNSKFTLGFFKAPDGAAGSADKWYLGIWFTAVPGRTTVWVANGANPIIEPDTGSPELAVTGDGDLAVVNNATKLVTWSARPAHDANTTTAAAVAVLLNSGNLVLLDASNSSSTAAAAPRRTLWQSFDHPTDTLLPSAKLGLNRATGASSRLVSRLSSATPSPGPYCFEVDPVAPQLVLRLCDSSPVTTYWATGAWNGRYFSNIPEMAGDVPNFHLAFVDDASEEYLQFNVTTEATVTRNFVDVTGQNKHQVWLGASKGWLTLYAGPKAQCDVYAACGPFTVCSYTAVQLCSCMKGFSVRSPMDWEQGDRTGGCVRDAPLDCSTGNNSNASAPSSTSDGFFSMPSIGLPDNGRTLQNAR…
Zm00001d042013	GNA	5	19.4036	10.5938	22.3208	79.9629	277.619	B_lectin + S_locus + PAN + PK	Plasma membrane	Plasma membrane	+	+	AT5G60900	RLK1		MALPIRLLSWLALATLLSVPGAAAQPVTNITAGNSLQAAAGAAWPSPSGRFAFGFYVTDGGLAVGVWLATTPNVTVTWTANRNVTPSTGGALWVTYDGRLVWTGPADGQDRPLAVPPRPATAAAMRDDGSFVLYGADGAMVWSTFAAAPTDTLLPGQDLVPGAQLFSSVSPTNSATGRYRLTNQINDGNLVLYPVQTENTANAAYWATGTFQIGFPLTLRIDTTGVLYVTGNGGNYTKNLTLPWAAPSPGEADVFYRVTLDPDGVLRLYRHAVTRGGAWTTGVQWVGPNDRCHVKGACGLNSYCVLSRDAQPDCRCPPGFGFIDAADATLGCTETSSAGGCAAAGSSAAPAMAAMQNMSWADTPYAVLGAGTSAADCQAACVADCLCAAVLLDSSDGTC…
Zm00001d043252	GNA	3	63.4839	436.94	3281.68	6738.79	4528.8	B_lectin + S_locus + EGF + PAN + PK	Plasma membrane	Plasma membrane	+	+			PCW6g	MRDATRGTHAAAEALAARRPRRAMASPLLCGCALLLYLLGHLATCHAARDTITPSSPLAANETLVSGGDGNFALGFFTPPGANSTYLGVWYNKVSLRTVVWVANREAPIAGAVGDNPGATLSVSGGGTLAIAAGNGTVVWSVRSASSRRLASPAAQILDNGNLVLKDGAGGGGAVAWEGFDYPTDTLLPEMKLGIDYVKGKNRTLTSWKSPSDPSTGPVAMVMDTTGDPQVFIWNGGEKVWRSGPWDGVQFTGVPDTATYSGFTFSFINSAQEVTYSFQVHNASIISHLGVVSSGNYGLLQRSTWVEAARAWNLYWYAPKDQCDAVSPCGANGVCDTNNMPVCSCLRGFTPRTPAAWALRDGRDGCVRSTPLDCRRNGTTSTTDGFVAVRHAKVPDTER…
Zm00001d043253	GNA	3	337.106	231.338	773.28	1241.53	592.271	B_lectin + S_locus + EGF + PAN + PK	Plasma membrane	Plasma membrane	+	+			PCW6g	MRACALPLVLLATAAFFPLSTSTDTLGTSASIAGNNQTLVSAGDVFQLGFFSPDGARTYLGIWYYNITVRTIVWVANRQSPVLSSPAVLRLSGADGRLLVLDGQNGTVWASAAPTRNVTAGATARLLDSGNLVLSSDGSGSDQSVAWQSFDYPTDTLLPGMKLGVDARAGITRNITAWRSASDPSPGDVTFKLITGGLPQFFLLRGKARLYTSGPWNGEILTGVPYLSSNDFTFRVVWSPDETYYTYSIGVDALLSRLVVDEAAGQVQRFVMLNGGWSNFWYYPTDPCDTYAKCGPFGYCDGTGQSPACFCLPGFEPRSPQQWNLRDGSAGCVRRTSLGCGGGANASSDGFWVVDQMKLPEATNATVYAGLTLEQCRQACLSNCSCRAYAAANVSGGVD…
Zm00001d043256	GNA	4	391.663	223.132	425.55	1437.63	1209.96	B_lectin + S_locus + PAN + PK	Plasma membrane	Plasma membrane	-	+				MRARTLSLLLHLLAAAASSFTPSASTDTIYRNTTLTGNQTLVSAGGIYALGFFSPAGADGRTYLGIWYASIPGPTTVVWVANRRDPVANAPAALQLSAGGRLVILDGNNDTVWSTAAPTVGNVTAAQLLDSGNLVLSADGGGQSVAWQSFDYPTDTLLPGMKLGVDIRAGITRNITAWRSPSDPSPGDVTFKLVIGGLPQFFLLRGATRVYTSGPWNGEILTGVPYLKAQAFTFEVVYSPDETYYSYFIREPSLLSRLVVDGAATQLKRFSLNNGAWNSFWYYPTDQCDYYAKCGPFGFCDTDRSPPCSCLPGFVPRSPDQWGRREWSGGCVRSTSLSCDGGDGFWVVNRMKLPQATDATVYAGMTLDQCRQACLGNCSCGAYAAANNSGGIGVGCVIW…
Zm00001d043257	GNA	5	44.502	15.4469	8.98197	18.5765	44.9668	B_lectin + S_locus + PAN	Plasma membrane	Plasma membrane	+	+	At5g18470, At4g03230, At4g11900			MFGKISFCRECTLVNLLILSVIASRCLSAPTERLGSIFQNQSILDGQTLVSMSRIFVLGFFSPGASSKRYVGIWHNDVSERRVVWVANRNDPLQDTSGILKFDNSSNLIVLDGRGNSFTVAYGRGVQDVEAAMLDNGNFILRSITNQAKIIWQSFDSPTDTWFPGINITLGAKLLTSWKSYDDPAVGDYSFGPGITNASQLIIWWKGIQFWTSLRWNGDTNSLIPELTSLGIIPVLFQCDNLTCTYTANPRDTMTKIVLDPNGSLNIAQFSPVTESWTLLWRQPPSCEVSNICGVFGICNNNMSPICHCPLGFEQQAGDTRKGCTRQIQLQCNGDRFVNMSNMRFPDSRVKLSVMGDGKCQLECMKNCSCTAYTYSVLDGCSLWYGNLTNMQDGYKSGA…
Zm00001d043923	GNA	3	213.265	258.126	617.44	555.646	578.183	B_lectin + PAN + PK	Plasma membrane	Plasma membrane	+	+				MAALLYLHPYLAVLPLLISPICSGASPWRTMTTGSHMRGEDHDKVTLLSPDATFSCGFHEVGTNALTFSIWYTPSASASATERTVVWTANPYSAERGQHSPVNKYGSRLSLNRDGNLVLTDTNGSTVWETKTSSGRHTTAALLDSGNLVIRDSSSGSNKVVWQSFRSPTDTLLPGQELTKDTRLVSGYHHLYFDNDNVLRMLYDGPEITSIYWPSPDYNALKNGRNRFNSTRVAVLDDLGTFVSSDGFRIEASDSGPGVKRRITIGYDGNFRMYSLNASTGAWRVTGQAVIQMCYVHGLCGRNGLCDYLGGLRCRCPPDYEMVDPTNWNRGCKPMFLTTDDGKEFTFVEQPHADYYGFDLSSNESVPFEACRDMCLNSSACLSFTYKGGDGWCYTKGLL…
Zm00001d045207	GNA		2.43859	1.26021	4.73587	9.71108	14.9948	B_lectin + S_locus + PAN + PK	Plasma membrane	Plasma membrane	+	+				MAMRDLCILTTLVSFLVSLSSVSAAYDHSYLARGSSISTQDVTTPILVSPNGAFTCGFYKVATNAFTFSIWFSWASGKTVSWTANRDAPLNGRGSRLIFHKKGALILVDYNGMVIWSTNTTASGSDRAMLLDSGNLVVMDTDGRHLWRSFDSPTDTLLPWQPMTRDTRLVSASARGLLYSGFYAFYFATNNILTLIYNGPETSSIYWPDPFHMPWDNGRTTYNSTRYGVLDQTGRFVASDQLKFEASDLGDETMRRLTLDYDGNLRLYSLNMTSGNWSVSWMAFPQLCKIHGLCGANSLCRYRPELESCSCLEGFEMVEPSDWSKGCRRKTNTTPFSFRKLTGTDLWGYDLNYSKLVPWLMCRNMCLNDTDCQAFGYRKGTGECYPKAFLFNGRDFPDP…
Zm00001d045950	GNA	4	34.5862	30.5605	52.9408	100.965	148.196	B_lectin + PAN + PK	Plasma membrane	Plasma membrane	-	+	At4g32300	SD25	SCW4g	MAPLPPGPEMEVMSGWLWKTALMEVPRKHHSPPKWSVILWMLVTANLWIMCSSSTQKKVLMPGFSASEMDYIDNDGKFLLSNGYVFGFGFATVSVSDSTYYVLAVVHLPTTSIVWSANANSPVSHSDNFVFDKDGNAYLQSGGSTVWTANISGKGATSMQLLDSGNLVVFGKDGSSPLWQSFSHPTDTLLSGQSFIEGMSLLSHSNAQNMTYTLEIKSGDMLLYAGFQLPQPYWSALQDNRVIIDKNGNNNIYSANLSSGSWSFYDQSGLLQSQLVIAQQQGDANTTLAAVLGNDGLINFYMLQSVNGKSALPITVPQDSCDMPAHCKPYSICNSGTGCQCPSALSSYANCDPGVISPCNSKNKFQLVQLDSAVGYVGTRFTLPVPKTNLTGCRNACMG…
Zm00001d046370	GNA	4	61.0109	45.8181	68.303	135.726	180.44	B_lectin + S_locus + PAN + PK	Plasma membrane	Plasma membrane	+	+			SCW4g	MNESSAAASSYLLLTLIIHLLPFVSAHDFLSAGSSLSVEHSSDVLHSQDGTFTCGFYRISPNASTFSIWFSGSSERTVVWSANPLHPVYTWGSKVELDADGSMVLKDYNGQIVWTNNASVSDAGHVQARLLGTGNLAVEGRGGAILWQSFDSPTDTLLPTQRITASTKLVSTNRLLVPGHYSFRFDDQYLLSLFDDEKNISFIYWPNPRMTIWAKGRVQFNSTMSGALDTLGHFLASDNATFTAADWGPGIMRRLTLDYDGNLRLYSLNVADRTWSVTWMAFPQLCNVHGLCGENGICVYTPVPACACAPGFEVIDPSERSKGCRPKTNISCDVEKVDFAKLPHTDFLGYDMTAHHSVSLDFCKKECLHDCNCKGFAYWEGIGDCYPKSVLVGGVTLQN…
Zm00001d046725	GNA	1	282.184	116.388	20.6871	1.7049	3.90005	B_lectin + PAN + PK	Plasma membrane	Plasma membrane	-	+	AT5G60900	RLK1		MAAALCFASLTRVRPFAAVLLLMLLQQARFRALAVARTNLTAGATLTPADYISSPSGTFSFGFLALDSDPTKFLLATWFHFADGNASSQFQPQPQPQSVVWFAKQSPSGSTSNATAQSVLSITSDGQLMLTDGQQVLWTPTTDRGSVLALLDYGNLQFLSDSGNQVLWESFSYPTDTLLPGQSLSYEPTGSEGKLFARRADAEFTTGRFSMGVQSDGNVVLYVDLLEGNDPENAYWQAYTNSPDGNTTVTFDGQGRLNYTLHNGTVNSLVKPAASFAAGEYLKFARMDPDGIVRTYVSPKNGGTGNASWTVSGAFPDYGCVKRTSGLQDMCGPGSYCVSAPTPSSRDRLECTCPSGYKYTDEQHRDSGCTPGFEPQSCDGENGGSDEFTLVELLNTTWE…
Zm00001d046802	GNA							B_lectin + S_locus + PAN + PK	Plasma membrane	Plasma membrane	+	-				MLSQHVLTLTIFLFFLVCFCHSLHDRLTSVTPLYPGDKLVSDNGGMFALGFFNLTTVNSTRSLYLGIWYNNIPERTYVWVANRNSPITTPSAKLVLTNTSRLVLSDSEGRVVWATDNSVVAGGSGTGTGGSGVLRSTGSFELELQLPNGTAGVVWKSLDHPTDTILPTFRLWTNYRAHTAVRVVAWKGPRDPSAGEFSLSGDPGSRGLQIVIWRGTGTGTAGGRSWRSGVWNGAGAFSSINRFVYSQVVDDGGTIYAAYNAAGGPTTHWKLDYTGNVSLRVWNVESSSWSVLFEGPGTGCLGYGACGPFGYCDATGRDGGVQECKCLDGFEPEDGFFRDFSRGCRRKEALQACGGGGEGGGGRRHYFLALPGMKVPDKFLYVRNRSFEECAAECDRNCS…
Zm00001d047122	GNA							B_lectin + S_locus + EGF	Plasma membrane	Extracellular	-	-				MVFTDYDGAAVWQADGNNFTGVQRAGLLNTGNLIIEDSGAHHCLTRLVPTTQSRSPGNYIFRFSDLPQVSDIYWPDPDQNIYQDGRNQYNCMRLGMLTDSRVLASSDFADDQALVASDVGPGVKRRLTLDPDGNLRLYSLNDSDGSWSVSMVAMTQPCNIHDLCGPNGICHYSPRPTCSCPPGYATRNPGISASVTAPVKAFSISKAHDHAIQKLIFSVEEPTQHLTCERYISSFQQG
Zm00001d051205	GNA							B_lectin + PAN	Plasma membrane	Plasma membrane	-	+	At5g03700			MLDLAIVHLPSTFPLWRAIPDRPAPWSTAASLSFDGGLVLTDRAADKVLWSTAATSASAGDRAVLLNTSNLQIQSTGGSSSPDVVWQSFDYPPKTIVQGQNFTSATKLYSFDRRFAMRLGSNYFGLHIEPPPSSGGVAAAMYFKHMAMEAKAQIVAGGGPTYARVEPDGFPAMYQREGPPADVLSFDTFNRGVRALRRMTLEPNRNLRAYYWNGARWALDYTAINDNDRCELPTTYGAYIVCAEPSGSCECLANATDGSGYAAAVPASFASNLCGTTGGEVGGLYWAVRRWGVEPVNKELLRSEQAASTTDCEARCEHNCSCWGAVYSNRTGVCYVMDYPAQLLVASDDRKMGYFKIMSLEEEGTRGRGDGRTSGVKAALLVVGVVSVVTAAAFGAYRV…
Zm00001d052509	GNA	1	45.2472	35.006	39.0692	37.8651	20.5904	B_lectin + S_locus + PAN	Extracellular	Plasma membrane	+	++	At5g03700			MKCRGDPAIAAAAAAIGVLCVASAVLLGLVDGATEGEEPTTQLLNGFTAAHAAGAPAPFQPVLYAPSGAFALGFLRVGAGSLDLAVVHLPSSFPVWRATPARLGDWSRPATLTFDGGLELTGHNGGMLWQTLGAVGDVVVLLNSSNLVVRRFEKTLPEWESFRHPSDTLVLGQNFTASSPPLVSANRRFALRLGKAYMALHMEFYGGQTAPAYWRHTALMAQPENATEPPVYGSLDARGFFGLYLEGGGQRVDVLSFDTFAQNLTAAFRRMTLDDDGNLRAYYWASGSKAWASDYRAISERCDLPTPCGAYGLCVPRKAECQCLDNSTSTAGAAPSCHAEETADLCAGNQLGLGFDVVRRKRVSVAYKEELPFETNRTAEECEAVCAGNCSCWGAVHSG…
Zm00001d052513	GNA	2	100.632	61.6571	86.388	85.6247	56.0215	B_lectin + S_locus + PAN	Extracellular	Plasma membrane	+	+	At5g03700			MKCRGDPAITAAAAIGVLCVASAVLLGLVDGATEGEEPTTQLLNGFTAAHAAGAPAPFQPVLYAPSGAFALGFLRVGAGSLDLAVVHLPSSFPVWRATPARLGDWSRPATFTFDGGLELTGYDGGVLWQTLGAVGDVVVLLNSSNLVVRRYEKTLPEWESFRHPSDTLVLGQNFTASSPPLVSANRRFALRLGKAYMALHMEFYGGQTAPAYWRHTALMAQPENATEPPVYGSLDARGFFGLYLEGGGQRVDVLSFDTFAQNLTAAFRRMTLDDDGNLRAYYWAGGSKAWASDYRAIAERCDLPTPCGAYGLCVPRKAECQCLDNSTSTAAPSCHAEETADLCAGNQLGLGFHVVRRKRVSVAYKEELPFETNRTAEECEAACAGNCSCWAAVHSGASG…
Zm00001d000406	Hevein							Chitin_Bind_1 + GH19	Extracellular	Vacuole/Lysosome	+	-	AT3G54420	EP3		MANSATPPPTMILTAALGLTFLLCATTPTAAQHCGCQPGFCCSKYGYCGKTSAYCGEGCKSGPCWGSAGCGGGGASVARVVTKSFFNGIKSHAGSWCEGRRFYTRSAFLEAIAAYPGFAHGGSEVERKREIAAFFAHVTHETGHLCYINEVDVAKYCDWSSEKQWPCHPRQGYYGRGPLQLSWNYNYGPAGRSLGFDGLGDPDRLAQDPVLSFKSALWYWMENMHQLMPQGFGATIRAINGFDECHGGKNTAEMKDRVRFYLEYCHHFRVHPGLDLSC
Zm00001d003188	Hevein	2	9.83636	11.3128	22.8437	27.6032	2.81691	Chitin_Bind_1 + GH19	Extracellular	Vacuole/Lysosome	+	-	AT3G54420	EP3		MVMAMANSATILTVVLALIGLALLRAAAPASAQNDCGSCPPGYCCSKFGYCGTSFDYCNGNTCQSGPCTAGGAGSGGANVSGVVTDAFLSGIKSQAGSGCEGSSLSFYSRRAFLSAASSYPGFARAGSEADGKRELAAFFAHVTHETGHFCYVSEVNKNNSYCNSSNTQWPCAPGKKYYGRGPLQVSWNYNYGPAGRSVGFDGLGNPDMVAQDPVVSFKTALWFWMSNAHQVMPRGFGATIRAINGALECNGENPAAVNARVGYYKEYCEQFGVGPGNNLTC
Zm00001d003190	Hevein	2	3935.06	3508.38	4029.41	3822.85	1784.33	Chitin_Bind_1 + GH19	Extracellular	Extracellular or Vacuole/Lysosome	+	-	AT3G54420	EP3		MANAPRILALGLLALLCAAAGPAAAQNCGCQPNFCCSKFGYCGTTDAYCGDGCQSGPCRSGGGGGGGGGGGGGGSGGANVANVVTDAFFNGIKNQAGSGCEGKNFYTRSAFLSAVNAYPGFAHGGTEVEGKREIAAFFAHVTHETGHFCYISEINKSNAYCDASNRQWPCAAGQKYYGRGPLQISWNYNYGPAGRDIGFNGLADPNRVAQDAVIAFKTALWFWMNNVHRVMPQGFGATIRAINGALECNGNNPAQMNARVGYYKQYCQQLRVDPGPNLTC
Zm00001d009936	Hevein	5	447.043	289.665	232.882	620.426	1533.13	Chitin_Bind_1 + GH19	Vacuole	Vacuole/Lysosome	+	-	AT3G12500	CHI-B		MSTPGAPSLATTAAAVLCVLAAALAVTVASGQQCGQQAGGATCRDCLCCSRFGFCGDTSEYCGAGCQSQCTGCGPRPAGPGVASVVPRDLFERLLLHRNDAACPARGFYTYDAFLAAAAAFPAFGTTGGDEQRKREVAAFLGQTSHETTGGWPTAPDGPFSWGYCFKQERNPPSDYCEPRPQWPCAPGKKYFGRGPIQISFNYNYGPAGRAIGVDLLNNPDLVATDPVISFKTALWFWMNARDNKPSCHAVITGQWTPTAADRAAGRGAPGYGVITNIINGGIECGHGTDPRVTDRIGFYKRYCDVFRIGYGSNLDCDGQRPFNSGLAVEVAAQ
Zm00001d014840	Hevein							Chitin_Bind_1 + GH19	Extracellular	Vacuole/Lysosome or Extracellular	+	-	AT3G12500	CHI-B		MAMMMRALAAAAILATAFAVSARAEPPQCGANSTTALCPYCLCCSKWGFCGSTEAYCGNGCQSQCDRCNATVASIVTRELFDELLLHRNDLRCPAQGFYTYDSFIAAAGADASDGFGTTGAVDIRKREVAAFLAEPAHRTSGGWDGAPNGTYAWGFCYKPAGAQNVTDPVAFFETAIASWMTASARPPKPSCHDVVTEQWTPSDADKAAGRLRGFGVIANIINGDAECGRGPDAGGQDRIGFYKRFCDILGVSYGDNLDCFDQKPFGAATAAALAETTSGPRHADA
Zm00001d014842	Hevein							Chitin_Bind_1 + GH19	Vacuole	Extracellular or Vacuole/Lysosome	+	-	AT3G12500	CHI-B		MMRALALASVLAAALAVSARAAQCGDGADGKLCPDCLCCSKWGYCGSTSDYCGDGCQSQCDGCGGGGTPPPPPPSPSPPPPPPTPTPTPGPPSGGGVASIITEDLFERMLKHRNEPDCKARGFYTTEVQKRELAAFLGQTGHETTGGWPNAPDGAFTWGYCYKEENGATADYCDMTGEYAQWPCVAGKKYFGRGPIQLSYNYNYGPAGEDATIAQDLLSNPELVASDAVISFKTAIWFWMTAQPPKPSCHDVATEQWTPSAADKAAGRLPGYGVITNIINGIECGKGYNEKVANRTFFYTSYCDILGISYGDNLDCYNQRPFNSASLAGTAAHAEA
Zm00001d017152	Hevein	5	682.142	227.417	149.824	467.829	657.984	Chitin_Bind_1 + GH19	Extracellular	Vacuole/Lysosome	+	-	AT3G54420	EP3		MAQKLAPPTAAVVVVLLALALSAAAQNCGCASGLCCSRFGYCGTGEDYCGAGCQSGPCDVPETNNASVASIVTPAFFDALLAQAAASCEANGFYTRDAFLAAAGYYPAFGRTGTVDDSKREIAAFFGNANHETIKFCYINEIDGPSKNYCDRNNTQWPCQAGKGYYGRGPLQISWNFNYGPAGQSIGFDGLGDPDAVARSAVLAFRSALWYWMNNVHGAIVSGQGFGATIRAINGALECDGKNPNSVNNRVAYYKQFCQDFGVDPGNNLTC
Zm00001d025753	Hevein	1	107.589	69.7446	56.9403	33.6164	53.9814	Chitin_Bind_1 + GH19	Extracellular	Vacuole/Lysosome or Extracellular	+	-	AT3G54420	EP3		MAMAKAGAPRVSAAQLVTLGLSLLCAVAGPAAAQNCGCQPNVCCSKFGYCGTTDEYCGDGCQSGPCRSGGGGSSGGGGANVASVVTGSFFNGIKSQAGSGCEGKNFYTRSAFLSAVKAYPGFAHGGSQVQGKREIAAFFAHATHETGHFCYISEINKSNAYCDPTKRQWPCAAGQKYYGRGPLQISWNYNYGPAGRAIGFDGLGDPGRVARDAVVAFKAALWFWMNSVHGVVPQGFGATTRAINGALECGGNNPAQMNARVGYYRQYCRQLGVDPGPNLTC
Zm00001d036366	Hevein	5	1089.01	65.002	150.297	198.37	852.998	Chitin_Bind_1 + GH19	Vacuole	Vacuole/Lysosome or Extracellular	+	-	AT3G12500	CHI-B		MAMTRALAMVAMLATAALFFMSARAQQCGTQAGGALCPDCLCCSQWGYCGSTPDYCTDGCQSQCFGSGCGGGGGTPATPPSGPVSEIISESLFNEMLLHRNDVACPAIGFYTYDAFIAAANAFPGFGTTGGADTQKRELAAFLAQTSHETTGGWDTAPDGPYTWGYCFKEEVGGVWGPDYCQPSPQWPCADGQKYYGRGPIQLSWNYNYGPAGEAIGQDLLGNPGLVAADATVSFETALWYWMTPQPPKPSCHDVITGQWAPSPADVAAGRLPGYGVLTNIINGGLECGHGADARVASRIGFYKRYCDMF
Zm00001d036370	Hevein	1	1215.55	705.536	446.973	174.067	178.113	Chitin_Bind_1 + GH19	Vacuole	Vacuole/Lysosome	+	-	AT3G12500	CHI-B		MMRALAVVAMVATALFFAVPARAEQCGSQAGGALCPNCLCCSQFGWCGSTSDYCGSGCQSQCSGSCGSTPNPPSSGGVASIIPESLFNQMLLHRNDAACPANGFYTYAGFIAAANAFPGFGTTGAPDTSHETTGGWATAPDGPYAWGYCFKEEQGGASGPDYCEPSAQWPCAAGKKYYGRGPIQISYNYNYGPAGQAIGAGILANPDLVATDPTVSFETAVWFWMTPQSPKPSCHDVMTGQWTPSAADTAAGRLPGYGVVTNIINGGLECGHGADSRVADRIGFYKRYCDLLGVSYGDNLDCANQTPFNG
Zm00001d005471	Jacalin-related							Jacalin	Extracellular	Cytoplasm	+	-	TaJRL4, LOC_Os12g14440	TaJA1, OsJAC1		MGIYSRGGFRGFAAGILLLWWGIGSYFHWLHIKQLDLWIPQQISFFKAIHLSLVAEINSIHLAKSEVVTELSGTIGKVDDRTVITSIKFVTNLKKTYGPWGAYGDDRDTQFIVPMQPGSGIVGFFGHAGDYLDAIGIYARAIPTTTTTPVMGRSLDRGFMVLISFDFLRLLQLVAS
Zm00001d005472	Jacalin-related	3	226.156	625.986	785.92	893.247	685.214	Dirigent + Jacalin	Extracellular	Cytoplasm	-	-	TaJRL4, LOC_Os12g14440	TaJA1, OsJAC1		MAKLQVTPGAAFTECNELNFQGLYMYHTPLGPKANQAAILESKAKIGIGATVVNNWAVYDGPGPGAKLVGRAQGLHILAGNWVNSFTLVFEDERFSGSTLEVRGITVETGEWAVVGGTGQFAMANGIISKKLHEQRSDGNVIELSVHAFCPLLKGKRGGAVTKVGPWGGSGGSPMELTETETPMRLESITVSSGVAVNSISFSYVDSAGHKRSAGPWGGSGGQPDQVQLAESEVVTQVSGTYGTIDDDDRTVITSIKFVTNLDKTYGPFGAYGDGDDTSFTVPVQPGSGAIVGFFARVGGAGDYLDAIGVYVRPL
Zm00001d009416	Jacalin-related	4	4.04783	5.0462	25.8	402.857	303.762	Jacalin	Cytoplasm	Cytoplasm	-	-	LOC_Os01g51050			MVVSKKKLIKVGPWGGAGGHPWDDGGYSGIRSITMSYDRFMESISVEYDRDGMPVTGERHGGAAASHTTQARPPPNQSPPSVTISDTAPSAGWFLNRARVRTQIKLGYPDEYLTTVSGHYAPIAPGGSPVIRSLAFRTNQGAYGPFGVAEGTPFEFPVDGGVIVGFCGRSGWQLDAVGLYVAPLRPETVYDRVHKLGLTAYRAVWQRIGSQQQQQEPVKLLNGNAQITHKM
Zm00001d010169	Jacalin-related	3	2.03035	264.196	1667	2353.5	207.532	PK + Jacalin	Plasma membrane	Cytoplasm	-	-				MEMQSTAAGTLAQSQAAAAGTGNSFTYADLHAITDGFSDEIGRGGFGVVYRGKLPQPDGEEVAVKRLTTTTDNNNPKQPAGDDDDEQFEKELGAVRSIQHENIVEFVGYCNGYTPSSTVLPDGRPVYRKIRALCFKYMEKGSLRKHVADESLDWQSRYEIIKGVCEGLNHLHSKGIVHRDLKLDNILLDGAMKPKIADFGLSRFMGAQETTRITRNIVGTFGCMPPEFFCDGQYSKSFDVYSLGTVIKEILAGPAAADDGSIYGYYDPLKKARRLSLFVAIYMHKQASEYWEQRLVEDADVQRVKACIELVPLCWGLDRKKRPTIERVLDTLNYTDISVQKEQHYYCSRSSGPQPEKSRLEGGAGGELRDIDMEVTPPPHRLKAVWLKHGAVIDSLQFS…
Zm00001d011012	Jacalin-related							Dirigent + Jacalin	Extracellular	Cytoplasm	-	-				MATPPNPPPPSTPIAAAAPLLPAEFTRFTFRALYVRRTGPSSREMIQPGRPYDELGRRLTSDYPVYDGRGSDAALVARMQGITVLVGNAHQLFTIVFETGRFKGSTLLTNGMVTEGSDEWAVYGGTGAFAMATGVIRRKNLLAGGGDSGGNSDELSVEVFCPVFGSPQQPPKDDDDGSAVTKIGLWGGPGGSAQDITTTEAPRRLNSVTIRAGIAVDSIEFTYTGKDRQRRTAGRWGGLGGNVRTIDLGDNEHIREVSGTYGTFEGATTLTSLRFITSTRAWGPWGTENGTRFCITAPIGSSVVGFYGRAGTRLVDAIGVYLRQL
Zm00001d011857	Jacalin-related	1	32.773	16.6924	11.5064	1.53113	4.62071	Jacalin	Extracellular	Cytoplasm	-	-	LOC_Os05g43240			MSSPTSHLSLPSPQSRNGAYGFIGGDARPDMVLLVQGRGDSYAVYTSNHPKQQYTNTSPDYNDGALWIKIVSVPSYYGDAGAAAMSTSLRPMAPRVLYDRNGHAVWGNKHGFSGGVIPDKVKLDFPHEVLTCVYYYYSTSREGDPRVLRSLMFVTNRGKYGSFGDEFDIYFSSATRRARWWGSTAAAASTCMPSTCTCSIGSRIGGLPPITEQLLGLHVSCFGWVDFDYL
Zm00001d012208	Jacalin-related	3	20.2886	164.564	425.697	600.72	94.833	PK + Jacalin	Plasma membrane	Cytoplasm	-	-				MHEGLLEMEMQSTTAAVTSAETQSQAAAAAAGSNFTYEDPHAITEGFSEEIGRGGFGVVYRGKLPNGEEVAVKMLTATGRDDDEQQFEKELGAVRSIQHENVVEFVGYCNAHVLSSTVLSDGRSPVYEKIRALCIKYMEKRSLKNHVAGLDWHSRYEIIKGICEGLNHLHSKGIVHRDLKLDNILLDEILAGAAAVSIYGGCVVPLEKAIEYWEQRLEEAADVQRFKACVELVPLCWGFDRKKRPTIERILDTLNYTDISVQQKGRRQAGADDPQPPEKSRLEGGAGGELRDINGMEVPHRLKAVWLKHGAVVDSLKFSYTDGDGREHHAGPWGSPDAWDKVLQLEPYEFLVSVSGTMGAYAGLPTKVISSLTFVTNVKTYRTRGVTEGDPFELEAPAG…
Zm00001d012640	Jacalin-related	4	684.73	707.789	744.573	827.377	880.704	LisH + CLTH + Jacalin + Jacalin	Nucleus	Cytoplasm	+	-	TaJRL16			MPLNMWLIWPYGSALSVDPTIYIYGIVMLYANCTHSFMFYPLLSFSIKGINYYCHLLDNLINANYTIIFVKLQHATDINFSLLQSVSDNDVRNIVLSYLMHNCFKETAEAFLSSTGLNLPVDYSVDVDKRKAIFNFVLEGNALKAIELTEEMAPNLLENDMDLHFDLLSLHFIELVRSKKFTEALDFGQKKLTSFQKVTKYIEKLEDFMALLAYEEPEKSPMFHLLSPEHRQNVAEGLNRAVLAHANLPAYSSLERVVQQATVVRQYLQQEVGKDSYPPFSLKAFLSNFYADSTGTSMSMSISIPVRFGPWGGNSGTIFDDGIYTGVRQINLTRGLVGISSMKVLYDRNGQAVWGDKRGVSGGSTRAQKVVFDFPSEILTHITGYFGSTTATMKMKMGP…
Zm00001d019312	Jacalin-related	1	24787.4	26383.6	11922.8	2309.48	5340.63	Dirigent + Jacalin	Extracellular	Cytoplasm	-	-	TaJRL4, LOC_Os12g14440	TaJA1, OsJAC1		MASLQVTPTSAFTEWNELKFEGLYLFHTPLGSGANQARVIDNKAPIGIGATVVNNWTVYDGPGPNAKLVARAQGLHIQAGNWVNSFSLVFVDQRFSGSTLEVTGIVVESGEWAIVGGTGQFAMANGVIFKKFHEQRSEGNIIQLTIHAFCPVLGPRKRSAAKVGPWGGSGGSPVDITAEPQRLKSITVATGIAVTSIAFSYVDSAGQTQSAGRWGGSGGETEPVIQLGDSEVLTELSGTIGNVDGHTVITSIKFVTSLKTYGPFGAWGDGSDTPFAIPVQQGSAIVGFFARAGVYLDALGVYVRSL
Zm00001d023516	Jacalin-related							Jacalin	Extracellular	Cytoplasm	-	-	TaJRL35, AAK54458	-, Horcolin		MGKPAKIGEWGGYAGDRRDLRATPDRLIEVKVTADNSSCIRSISFIYIGADGKPYEEGPWGFGHAGTEYKSLKFVTNKRAYGPYGRDEGTPFRVKVMNNGHVAGFFGRSGDCLDAIGLYVNPN
Zm00001d035394	Jacalin-related							Jacalin	Extracellular	Cytoplasm	-	-				MTIRSGDVIEAYVDTAGNDYTTDLWGGGNGSFTKIELGDDEYVREISGTYGPYDNVLNLVTSLNIIVTNVASFSFGNAQGDTFSIPVENGGQIAGFYGRSGWLIDAIGVYIHP
Zm00001d035558	Jacalin-related	3	0	3.35721	21.9235	0	5.6179	Dirigent + Jacalin	Extracellular	Cytoplasm	-	-				MENPPSILVTPMAPAMSAQFTRITFSNLFVRRAGPGSTELTVEGRPSDQLGRRNLTDSPVFDGRGPDASLVARVQGVATQMGDVRQLYTVVFQERPLKGSTLVTEGAMTEGSDEWAIYGGTGVFAMARGVIRRTFLADTSGGNSDELAVEVLCPVFRPAAFGSSSSQPAAKDISSTVVVTKVGVWGGEGGSAQDIATTEPPRRLQSLTVRAGVAVDSIEFTYSTDTGGQTRTAGRWGGLGGNVRKLDLGDAEYVKEVSGTYGAFEGATTLTSFRIVTSTARAWGPWGIESGTRFCITAPIGSSIVGFYGRATTRLVAAIGVYLRQL
Zm00001d035559	Jacalin-related							Dirigent + Jacalin	Extracellular	Cytoplasm	-	-				MENPAPSIVVPPIAAPVSANFSRLAFRNLYIRRTGPDSREMVTVEGRRGSSDQTGDMRYVSDFPVYDGRGSDAVLVARVQGVTTTFGNSNQFFTVAFEAGRLKGSTLLTEGVVTDGSDEWAIYGGTGEFAMARGVVKRRYLADRDGAGNTDELSMQVFCPVFGSSQQPNKQARADSTISVTKIGLWGGEGGSAQDITTTEPPQRLHSLTVRASAAVDSIEFTYTDRGGQRRAAGRWGGLGGNLRTIDLGDAEDVREVSGTYGTFEGATTLTSFRILTSSRTWGPWGVENGTRFCITAPVGSSIVGFYGRATSRLVAALGVYLRRL
Zm00001d035560	Jacalin-related							Dirigent + Jacalin	Extracellular	Cytoplasm	-	-				MAENPAPSSPLVTSPDAAAPPLPAEFTKLTFRSLYIRRTGPGSREMTVDGRPSDQLGRRFVSDFPIYDGRGSGAHLVARLQGVTVQIGSSHQLVSIVFEAERLKGSTLLTNGVITDGSDEWAIYGGTGVFAMATGVIRRRFLAGSNDGNSDELTSIEVFCPAFGSAQQQPNKQDSVSVTKIGVWGGGGGSAQDITTTEPPQRLHSLSVRTGFAVDSIEFTYTDRGGQRRTAGRWGGLGGNLRTIDLGDAEVVREVSGTYGMFEGATTLTSIRILTSSRTWGPWGIEDGTRFCITAPIGSSIVGFYGRSTSRLVAAIGVYLRQQL
Zm00001d035561	Jacalin-related	3	131.944	413.636	700.474	412.749	951.629	Dirigent + Jacalin	Extracellular	Cytoplasm	-	-				MENPAPSIVVAIAAPVAAEFVKLTFRALYMRRAGPGSREMTVPGRPSDQLGRRVVTDSPVYDGRGADARLVARIQGVTVLVGNADALFTMVFETDRLKGSTLVINGMVTDGSDEWAIYGGTGVFAMATGVMKRRNLAGGSNDGNSDELALEVFCPVFGASQQPISKQQESISSVTKIGLWGGQGGSAQDITAEQPPRRLHSITVRAGVAVDSIEFTYTDDAGQRRTAGRWGGLGGNVRTIDLGDAEDVREVSGTYGAFEGAITLTSLRLVTSSRTWGPWGVENGTRFSITAPNGSSIAGFYARAGTRLVDAIGVYIRPVVPGRPR
Zm00001d035562	Jacalin-related	3	357.888	782.11	1002.35	710.784	1786.23	Dirigent + Jacalin	Extracellular	Cytoplasm	-	-				MENPASVLVLPAQFTKLTFGNLYIRRAGPGSREITEEGRCDLDKRYVSDFPVYDGRGPDASLVARVQGITSEIGNAHQLFVVVFDTDRLKGSTLVTNGVITAGSDEWAIYGGTGVFAMARGVIRRRYLADRAGGNTDELNMDVFCRPFGSQSELQDKMQVQGQGSSVTKIGLWGGPGGSAQDITAERPPQRLHSVTVRAGVAVDSIEFTYTDSAGQRRAAGRWGGLGGNVRTIDLGDAEDVREVSGTYGAFEGATTLTSLRLVTSSRTWGPWGVENGTRFSVTAPIGSSIVGFYARAGTRLVDAIGVYLRQI
Zm00001d038651	Jacalin-related	5	212.15	140.739	111.599	296.571	536.614	Jacalin + Jacalin + Jacalin	Extracellular	Cytoplasm	-	-	LOC_Os05g43240			MSIKSINGKSPIVVGPWGGTGGYPWDDGVYSTIRQIVIGHGAAIDSIRIEYDLKGRSVWSETHGGTDGGSETDKVKLDFPDEVLVSVSGHYGSVCGTPVIIRSLTFQSNSSTYGPFGTEDGTPFSLPVSSGKIIGFHGRSGSYLNSIGFYLKQVHFPTPVNPSPASPLSLPSPQSRNSAYGLTGGDARPDMVLAVRDRGDSYAVYASNHPKQQYTNPSPDGAIWNKMVSVPSYYGDTTGAAAVGGSPQTYGPWGGSGGTIFDDGVYTGVWQINLTRAVGISSIKVLYDRNGQAVWGNKHGFSSGVIPDKIIFDFPSEVLTHITGFYDSAIIMGPTVVRSLTFHTNKRTYGPYGDEYGTYFSTSFTNGRIVGFHGREGWYIDGIGVHVQEGKVAQQRFVS…
Zm00001d047252	Jacalin-related	3	17.3309	114.178	436.841	1372.96	1793.39	Jacalin	Extracellular	Cytoplasm	-	-	TaJRL28, TaJRL24		SCW4g	MGSAVKIGTWGGDGGSPCDITVAPRRLESITIRWGKVLDWIAFSYRDQSGELHTAGPWGGNGKGEGTETITLEASEYVTGVAWSVGPFKFKNVERCITSFKVVTNLRSYGPFGHGVDSTHHSLPVLDGSVVGMFARAGDFLDAIGFYVLPDALPALKPTTDPAEQEEKEKDSGHQQNGKAKSNQEENEDSKNEKDKPLS
Zm00001d048876	Jacalin-related	4	988.12	809.817	1632.15	2710.73	1819.1	PK + Jacalin + Jacalin + Jacalin	Extracellular	Cytoplasm	-	-			PCW6g	MNIRHHNIVLFVGYCAETQEVVVRQEGKHIFAEKRERLLCFEYLHNGSLHKHLTAEPCGLPWHICYQIIKGICLGLHYLHDKNIIHLDLKPDNILLDDDMVPKITDFGLSRLLGNGKSHTITQTRIGTWGYMAPEYLDDGVITMKTDIYSLGVIIRHMVKGRNSADTTDEEVLANWLIRLEKDPSQMMRQQTTRLLFETEYKEQIKACMDISWRCTLRKPMDRPTTQHILLTLEETEAKIKSVVGPTPPNAGQLQIAKFGPWGGDGGKTRDIRMTPCHLHSVTISSGTIIDSIGFSFTDHYGQHHTTGPWGGKEGTNKIELGPSEFLTGVSGTSGPFKNLTNVVTSLTFVTNTRSYGPFGKGRGTPFHIQTQNNGRIVGFFGRSGQYLYAIGVYTNQDA…
Zm00001d052382	Jacalin-related							Jacalin	Extracellular	Extracellular	+	-	LOC_Os04g03360, LOC_Os04g03320			MAKKLSRAAVLLLVAAPLFKYLCAVLVGIQVGRALERCPESARFSLGETLHYVTKELWDGNVLGGRRGGGTHSCFTVSGAESSSSEERPYAALASADGVRAPRTNSDANVTQTTTYTYYNHTSPRGVISVGPWGGSGGQPFYMRGASAPRLRSVVLYHSGAIHSLAYEYTLAGDYDYEGPPRRRRVAGPWGLPHSYGSRGVRAEIDLRSGEHVTAVEGTTGHFADVPGVVVTSLTFRTSAGRTYGPYGSVGAGSHRFSVPAADGARIVGFWGRSGWLLDAVGVYMKPPPCSSSDTAAYEKHASRRQRRN
Zm00001d002536	Legume	4	25.8071	28.588	79.7971	205.616	184.763	Lectin_legB + PK	Plasma membrane	Plasma membrane	+	+	At5g06740			MASPSHTGIRRRFALLASATLAILVLCGTCSCLQFSYPTFGAANEADFSFTPGAGIEDGALQITPSTGDLRHRSGRVCYARETLKLWNRRRTALTSFRTEFVLNIVPRNGTGEGMAFILTNNPELPRNSSGQWLGLVNGQTDGSPANRIVAVEFDTRKSGKHDHDDNHVGLDVNGIESASAYPVGNLSIVLSSGADVWVTIQYDGATLSIVAVQTYSFMYAWAGDLSQYLTDDITVGFAASTGDFTELNQIKSWNFTTLGDDADGRWRHRKKMRLLLAYLIPFAIAGSFLAFCVWRRLTRPRRLAYRNLEKMIDAQGPVKFKFRELRNATANFSSDRKLGRGGFGTVYLGYLKRMGVNVAVKRVMTSGNSNRGEQEFVAEVNSISKLSHRNLVKLMGWC…
Zm00001d004072	Legume	4	0	0	3.82463	83.1559	119.257	Lectin_legB + PK	Plasma membrane	Plasma membrane	+	+			SCW4g	MSCLRILLLVPLFLSSGMSGCLASSSSASSGCSCGDSTAHDLSSFTSDSAAELVLLKDAGISNGVLHLTADSSRNRNRSGAALMPGPVTLWCQDPDDDAEAKQDASFEASFTMGIVSNPSPDEEGAVQRKGDAGGGGGGLALVMVASLNSPALGILGLSNNPSDQVSSSSASSGFVTFTFNTVKLKQSNGDPDDSNGTVINLDVVVSVSGAVFARSPPLTITTATATNNQVAMKNCTVWIDYNNGRVSIYVDVQGRPKPDKAAIDGVALNLSDHLPQRAFVGLLASTDTSTELHSVLSWNLQVSLPGDGPSMDWKVILPAVLGGITFTGIMNLLVAVFYFNSKYNKLKMELVLSETLRRLPGMPREFKHATMRKATDNFHEARRLGKGGFGAVYRGTLR…
Zm00001d004078	Legume							Lectin_legB + PK	Plasma membrane	Plasma membrane	-	+	At5g65600, At5g10530	LECRK-IX.2, LECRK-IX.1		MPLSTNSMALTNLCSCPSSRAHQLQLLCFCLALSLHVPYHANSLSFSYSFFNPDDFRPEDDAQVVDGRIELLGDEFRGRARGRVWHKQPVQLWDGTTGEAASFTANFSFSIESVAGKGAASAGHGMTFFLAPYTPNLPQESYDGCLGLFDESQALNYSKFNASGDSRFVAVEFDIRKDIWDPSSQHIGIDINSMDSRGDYTVLPDGSLVDAGVMSATVVYDNRTRSLRVTLMVGSVTYTSVATVDLRSLLPEKVAVGFSAATGDEYNANHTVLSFSFASTLATKNSTSMPVTVTSSTKKATLQLGAGAAAAALLVFLLVATVALLLVRRSSRRGKKPYDDEQLTTDGDDSLDAVDDSHFESSTGPKPIPYAQLAAATKDFAAEGKLGQGGSGSVYRGHL…
Zm00001d004524	Legume	5	112.459	46.7953	45.1545	63.0722	115.931	Lectin_legB	Plasma membrane	Lysosome/Vacuole or Plasma membrane	+	-				MTRLVPLQLLVVVVGAAAITVATASAAHVDSFSYPTFDATTTQDLVAATNTSILTSASLLFGHDADFNFNRTEGFILLSRTVDVWRAGPGGGPAREASFNTSFALSGAAPVAYVVLRDSYPPLHGTGGLRGFANYSASDAEDGATPRNASSGLASVEVGPVRSYGPDDPAVGLNVTVTPTGGTAPGGGGGGGGARAVWIEYDAAKHRLSVYVAAAGEPRPAAALLDARLGLAGRRTTETAMVGFFASAIQDVLVGVRDWNLTVDRLDTSEGGGRKEGAACWVFVLLAVLGSVAATA
Zm00001d004905	Legume		0.433504	0	0.27006	1.98644	11.0839	Lectin_legB + PK	Nucleus	Plasma membrane	+	+				MCVVPCSSSSSTILLLLLICSLVLLCCSGSGSGDLHNYFEPYTLGSLFNETDGHLFHVNPNTTIGNVSAGGLQGSHTTNDLPFNLSDKGWFFLPQPIFLWKYTYRDDGVSFHEASFDITFTISGIYQPKSSLVFAIQPSLDDDVGYIKYPIPMSPPQIGTSASHTSPVSGTGGSHVSAQASVVYGTILDPRNASLVQIDIVESPGSSSTTGSRYSVWVGYDHVEHSISVAVDSTHGTPSTATANGVLRLSSIMPQFASLGFYSTMGQLQLLGDWSLTAERLPYSYYYPSSSNSTSTSTGNNGKTIILSSVLGSAAAVAITATVAYVYFNSKYRKWKKEQDKLAKTMQRLPGVPTQVDYADIRKATKNFHDTTKLGKGGFGAVYRCTLPAASLRTGRGME…
Zm00001d006627	Legume	4	0	1.06461	8.23656	36.852	66.2664	Lectin_legB + PK	Plasma membrane	Plasma membrane	+	+	At5g65600, At5g10530	LECRK-IX.2, LECRK-IX.1		MRSRSTTTWFLALLHLIVFCNITGVSSLSFKLNFTESNSNGAATIQLQEDAFYNKAVRLTKEELDGQIAHSVGRAVLADPVTLWDSSTGELADFTTRFTFMIKARVADGSYGEGLAFFLSPYPSVVPKNSEDGNLGLFGSSSADQSSETSNQIVAVEFDSHKNPWDPDDNHVGINIHSIVSVDNVTWRSSIKDGKMANAWVTYQASSRNLSVFLTYKDSPQFSGNSSLSYSVDLRRYLPEKVAIGFSAATGQLVEAHQILYWEFSCTDVRVVKSKKAKSLLVISLTTSVSGIVCSMGLVWCFMSLKTKHTRRARKDQGKQEYDESIDGEFEKGRGPRRFRYDELVSATKNFALERKLGEGGFGAVYKGSLKDPNLTVAIKRVAKGSTQGKKEYISEVKI…
Zm00001d007803	Legume							Lectin_legB + PK	Plasma membrane	Plasma membrane	+	+				MVKEASSMSVRRPGLVCLADVMNMHQPCFLQYLLLILVPLLLSASAYDRSGEFIFDGFSGNDLITMDAASVTNGLLSLTSGQKELRGHAFYAFPLDFTSAAVPNSSAVLSFSTTFVFAIIGPYDDLSGHGLAFVLSSTNDLFTALPSQYLGLLNSWNDGNSSNHLLAIELDTIQSTQFNDINDNHIGIDINSLSSVASHTAGYYTSNGEFHPLKLISRKPMQVWVDYDSNHIMLNVTIAPYFMSSTKPSRPLLSTIFNLSSILPTATVYAGFSSATGTLNCKHYVLGWSFKLNGEAASLNYSALSVKTIQELAQQVPTSDHPGSYKVLICKILLPIVAIFVLVSAVLVKVHMKRRSQERAELDWQREYGPPSFTYKELLAATHGFKDKMLLGRGGFGSV…
Zm00001d007843	Legume	3	132.576	190.064	546.271	611.79	535.051	Lectin_legB + PK	Plasma membrane	Plasma membrane	+	+				MPSFLVVAFFVLLCLGLNNLPALGDAGGGNEYSFVYSGFGGATGASLVLDGTATVTREGVLKLTNDEQANLKGHAFHPTPVQFRDSSSSSSPNNGTAAVRSFSATFVFAIISASTYWSSDGMAFVVSPGKDLSGASSAQYLGLLNSTSDGPGAAASNHVLAVELDTVMNVEFQDIDNNHVGVDVNTLSSVHSRAAAFYDDDTEGGGGGAWKNLTLSSGDAMQVWIDYDGEAKQLNVTLAPIATRGVKPSRPLLSNVTDLSAVLAAQASYVGFSAATGPIPSQHCVLAWSFAVDGPAPPIDFSKVPKLPDDTAGRREALVRELEIALPVAAFVLVLATCVTVVLLVRRHLTYAELREDWEVEFGPHRFAYRELFRATDGFKSKHLLGAGGFGKVFKGVLS…
Zm00001d010971	Legume	5	485.929	399.669	602.238	717.827	1413.02	Lectin_legB + PK	Plasma membrane	Plasma membrane	+	+	At5g03140, At3g53380	LECRK-VIII.2, LECRK-VIII.1		MARAAAAAAALPLLLLLLLLLLADHAAAVRFDYASLTLGSLRLLGDAHLKNGTIRLSRDLPVPTSGAGRALYATAVPLRGGFSTQFAFTVATLNPSSVGGGLAFVLATDGATLGDAGAYIGVSVATDAAAVEFDTLMDAQFADPNGNHVALDLGSMVSAAAADLGAAGVVLASGRTVNAWIDYHPSASPGSGGTLEVFVSYAPKRPPRPVLSAPLDLSEDVKDAAFVGFSASTQGSTEAHAIEWWSFSTASPAPSPRSAPPESPALPPPVSNQVLPGVTTTTAPPPPPPTGSVAAPAGSIAPSGAAAGRNAGPRPPVHAAVAGAATAGAFVAASFAGVAVWVLARRAKARRRQTALAVGTKRDSNVASAAALARSPREFSYKELSAATRGFDASRVIGN…
Zm00001d012625	Legume	3	56.2449	77.3535	129.719	110.69	160.52	Lectin_legB + PK	Plasma membrane	Plasma membrane	+	+	At5g65600, At5g10530	LECRK-IX.2, LECRK-IX.1		MEISAGVTTVTAVSILILLLLPQPAAPFSFTYNFTSPSDTPPPGIAFQGDAFYNKAIRLTRDERLGPITSSTGRAFYSHAVPLADPVSRRPASFVTAFAFSIAAPDPASASGDGLAFFLSPFPSVLPESSAGGLLGLFNSSSVRAGTLVAVEFDTHKNEWDPSGDHVGVDLGGIVSSATADWPTSMKDGRTAHARVEYDGVAKNLTVSLSYGSARPNTTGDVLLWYAVDLRDHLPDSVAVGFSAATGEAAELHQVLYWEFTSTVDPKEETVVLWVVLGLCALLLVLVGAGIVWFVRQWRKAGQFDDGDIEVDDVMGGEYDELADEFVVQCGPRRFRYAELAAATKNFAEERKLGQGGFGAVYRGFLKELGFEVAIKRVSKGSTQGRKEYAAEVRIISQL…
Zm00001d015891	Legume							Lectin_legB + PK	Plasma membrane	Plasma membrane	+	+	At5g42120	LECRK-S.6		MPTPRASLLTLLLLLAVQLPPAAAASKHRHASESAPAPPASYFLVSWASNLTLLGSASIQPGATAVALTTPSHDGVGAGRALFSEPVRLFVPSSSAAASFSTRFTFRITPAPTFGDGLAFLLTSSRTFLGASNGFLGLFPSSSASDEGEADLGGVTTVAIEFDTHRDVALRDPDGNHVALDAGSIFSVASASPGVDLRAGVPITAWVEYRARRRRLSVWLSYSPFRRPEKPALSADADLSGLMRTYMYAGFSASNGNGAALHVVERWTFRTFGLANSSRASPPSEPPTEPSKPLLPPNKPQLLTGNHKHQHLIYKVVGGVIGGIVLLVFAIVASVVWFSKPVRRPSEEEERTVTSEDKPYGTMSMEVVRAATKGFDSGNVIGIGGSGATVYEGVLPSGS…
Zm00001d016009	Legume	5	5.78247	1.8581	3.94082	5.71756	29.3831	Lectin_legB + PK	Plasma membrane	Plasma membrane	+	++				MLSPKETHLAVPVHRHLVLFLLLGLAIASLATGDDQFVVTGFTQSSFNLEGAVTVTNGGLLDLSTGTSYLKGHALYPTPLHFRKTPNGKVQSFSACFVFSIVNTYPLLSDDGMAFFIAPANTSFAGATPGMYFGLVNSKDDGKPSNRIFAVELDTYQNSELHDMNDNHVGIDINGATSLSSAAAGFYDDESGGAFRNLTLNDHSEMQLWVDYDERSTRINVTLAELRAAAKPSRPLLSTTYDLSAVLGDPAYVGFSATAGPINVRDYVLGWSFGINTPAPPIDVSKLPRLPRVGPKPRSKLLEIILPVSTAVLILAVGAATAMVALTRWRYAEVREDWEAEFGPHRFSYRELWRATGGFKRKHLLGEGGFGKVYKGVLPVPGSNGGTIDIAVKSMSHES…
Zm00001d017821	Legume	4	115.407	37.989	52.033	409.209	867.01	Lectin_legB + PK	Plasma membrane	Plasma membrane	+	+			SCW4g	MTTGPWRRGGRATTNLALLLLLACVTVAVRSIPAALAQATVSTSTVAGVDFTTFSFPGFDKNPTDLTLWGNASVNQNALQITPDTGNNANSFLVDQAGRAFYATPFTLWAANASSSNSSAPGGRRVASFSTVFKANLYRQNQAVKGEGLAFVVASGNGGQPPGSYGGYLGLTNASTDGLAANGFVAVELDTVKQPYDPDDNHVGLDLNGVRSVSAVPLAPYGIQLAPNDTSSSGDQMVWVDYNGTARHVRVYMSANGSSDKPATAVLNASLDLSEYLLGNDAYFGFSASTGVGYQLNCVLMWNMTVEVLHGARVPSKKLSGWKLGLAIGVPCAAGLALGLLAGLYLMKKRRKVGDDPSSVLHNNAIDLRSIPGVPKEFDYKELRKGTDGFDDRTKLGQG…
Zm00001d018059	Legume	1	213.327	156.053	139.546	103.289	140.383	Lectin_legB + PK	Plasma membrane	ER or Lysosome/Vacuole	+	-	At5g65600, At5g10530	LECRK-IX.2, LECRK-IX.1		MSSTTTTTTRLLVIPLVYLMLVASASHSALSSASLFFDVDFSNASTFSLADFTTAGDAAFHGQRFDLTANAYRAGISDSVGRVAYAHPVPLRDNATGQVASFTTSFTFAINITDMNNKGDGMAFFLGNYPSGLPPRSEGGALGLCTDYCVNRTAGRDRFVAVEFDTFDDSWDPHLTYDHMGINVNSVVSVANISLPSFSLNGQMSARVDYNSSTSVMGVDLRFDRSPKFGSATPIFNVSAKVDLSSALPEQVAIGFSAATGASIELHQLLSWSFSSVAPGTGSPTDPGTRLMDEEFEKGSGPKRFEYGQLSVATKGFSEEEKLGEGGFGAVYRGFLKELDLHVAIKRVSRGSEQGRKEYSSEVRIISRLRHRNLVQLIGWCHQGKELLLVYELMPNGSL…
Zm00001d018599	Legume	1	174.626	160.682	124.298	52.0542	45.7156	Lectin_legB	Plasma membrane	Plasma membrane	+	+	At3g54080, At5g01090, At3g09190, At3g09035			MPPLLALFFLCLSLALRPATAVSSPSFALDFFPAAGAIAQLSLSGGATANATAGSVSMPIPDARVQYRTPIAASALRLGFSTYFAFALPHAPSSLAFFLTPSASRSPPALALVFSARHIRLDLAGRTALQTETRHPVPTTASHLHAWIDYYHSNSSSSSADTDTLHVQLAATRIPTANHHPTPTPPLLSYPLHLLPVLRRGPILAGFRTSSGNCTLFSWAFRAAPNRMHSLPLNPADLLTTPPPEREARASQPAPDRRYSSPWGAALSLLLAAAAGAMLTFIVLFLWYYATKRRPVAPVEYPMHPSHVVYEKIVLVGVKDDAAAADAAGNK
Zm00001d019333	Legume							Lectin_legB + PK	Plasma membrane	Plasma membrane	+	+				MNMEHAVFLFLVWLNTAAITTLCAGGGQTRFSYSGFAGANLTVDGNATVTPDGLLVLTSSKTNLQGHAFYHTPLQLSTSPGGKVASFAAAFVFAIVSDYTDFSAHGMAFVVAPNKGFPGALPAGYLALLNVQNNGNASNHLLAVELDTTQNTDFKDINANHVGIDINDLHSVQSSPAGYYDGGGVLRNLTLFSREAMQVWVEYDGDAGRIDVTLAPIRVGNNKPARPLVSAICNLSTVLKEQSYVGFSSATGGINSRHYVLGWSFAMNGPAPAIDIARLPKLPPFGPKPRSKVLAIVLPIATAAAIVAVGSLATLLVLRKLRYAEVLEEWELEFGPHRFSFKDLYHATSGFKSKHLLGAGGFGQVYKGVLGSSKSVCTEVAVKRISHESRQGMKEFIAE…
Zm00001d019334	Legume							Lectin_legB + PK	Plasma membrane	Plasma membrane	-	+				MQNDEFQDINDNHVGVDVNSLHSVQSYYAGYYGGGGGSGGFRNLTLISGEAMQVWVDYDAEVAQINVTMAPLSMAKPARPLVSARYNLSTILTDDGPAFVGFSAATGGTLKSRHYVLGWSFSIDRPAPAIDLSKLPKLPRVSAKDRTRTLEIVLPVATAAFLLAAGMAILLLVRRHRRYAELHEDWELEFGPHRFSYKDLFHATDGFKNSNLLGIGGFGRVYKGVLPASRTEIAVKRVSHESKQGMKEFISEIVSLGRLQHRNLVQLLGYCRRKGELLLVYDYMPNGSLDKCLHDREGQHTLDWALRVQIIKGVASGLSYLHLDWEKVVVHRDIKASNVLLDGDMNGRLGDFGLARLYDHGGADGPKTTHVVGTIGYIAPELGRTGKASPLTDIFAFGI…
Zm00001d019411	Legume	5	5.95378	1.99748	4.17783	11.6769	90.3238	Lectin_legB + PK	Plasma membrane	Plasma membrane	-	+				MSMLLQFLFLSLILLAASTTGGDGQQFAYSGFSTNDLVVDGATTITSNGLLELTNGTDQQTGHAFYPTPVQFTRSPNGTVQSFSTSFVFAILSVYTDLSAHGMAFVVAPSRNFPGALPGQFLGLTDIRNDGNASNHFFTVELDTIENKEFGDINANHAGANVNGLRSLNSSSAGYYADGDVNGGEFHFHNLSLISREAMQVWMDYDATASSITVTMAPSKAARPARPLFTATHNLTSVVTDAAYVGFSSATGTINTRHYVLGWSFAMNGPAPAIDVSRLPKLPRMGPKPLSKALEIVLPIATAAFVLAVGSAAFLLVRRHLKYAELREDWELEFGPHRFSYRDLLDATEGFKDELLLGVGGFGRVYKGTLPVSKLEVAVKRVSHDSRQGMKEFIAEVVS…
Zm00001d019413	Legume	5	1.91408	0.264175	0.27006	7.24825	40.7165	Lectin_legB + PK	Plasma membrane	Plasma membrane	+	+				MHQMKTKHRSFLSFLCFIIVSLVFALSDCAVSSGDHFVYHGFAGVNLTLDGNALVTPDGLLELTNDTVNLGHAFYPTPLSFNTQQRPNGTVRSFSVSFVFAILSVHADISADGMAFFVAPTKNLSNTWAQYIGLLNSGNDGNTSNHMFAVELDTTQNDEFKDIDNNHVGINIDSLTSLRAHHTGYYGGDDSGSFSNLTLISGKAMQVWADYHGETTQIEVRLAPAGAAKPARPLLSAVCNLSAVLVSDKSYIGFSATTGAISTRHCVLGWSFAMDGPAPAIDLSKLPELPRLGPKPRSKVLEITLPIATGLFVLAVGLVVVLLAYRRLRYKEVKEDWEVDFGPHRFSFKDLFHATGGFRKKNLLGVGGFGQVYKGVLPESRAEVAVKRVSHESRQGMKE…
Zm00001d020138	Legume	1	18.2879	0.866953	0	0	0.665985	Lectin_legB + PK	Plasma membrane	Plasma membrane	-	+	At5g65600, At5g10530	LECRK-IX.2, LECRK-IX.1		MAVMSSGGLLPTLCCLCYVLSSVHVPLAASLSFHFNFSDPDSTCTAQNAELACSSDAYFHSTEDAIELTKNGMDNHNNKSVGRLVYTQPIPLWNGATGELASFTTSFTFRIKRAQPGSPSGDGMAFFLAHHPGRVPPSSFGRNLGLFNDSTNRNATGDDRAVAVEFDTFENDELEDADGNHVGIDVNSIVSTDSISPDKSIKSGETLAADVAFDNTTETLSVTLWMSGAPYRVSANVDMRKSLPQMVAVGFAASTGNNVEMHQLLSWSFNSTLASSKDGETRPPAPSQAIVSKNKSKARSSAIAVSSAAAFVVVCALTGFLLRRKLRMWKTSKEASGAGELDDDEHDGEEAEFEKGVGPKRYSYRELAAATRNFSEETKLGRGGFGHVYQGRLNIDGQD…
Zm00001d021896	Legume							Lectin_legB + PK	Plasma membrane	Plasma membrane	+	+				MKANQNMSAKLLSLVVLLLLIHVSVPSSSADVGHQFIYQGFAASDLALNGLAAVTPGGLLALTNATFQAKAHAFRPAPVHFLNASSSAAAATARARARSFSTCFVFAIVSAYEGLSDHGLAFVVAPTTSFSAAKAGQYLGILGAINGTASDPVLAVELDTILNPELSDIDSNHVGVDVNSLVSEQAMPAGYYDDAAGGAIRELQLNSRKPMQVWIDYDGQAGRLDVTLAPVRVPKPSRPLVSTAVDLSTIVGRGGPMYVGFSSATGVVATHHYVLGWSFGLDGPAPPLDMSKLPVLPRVGPKPRSKVLDVLLPLATALVVAAALAAISFAMWRRRRFAEVREDWEDEFGPHRFSYKDLFHATNGFDAVNLLGVGGFGRVYKGVLPASPALEIAVKKVSH…
Zm00001d021897	Legume	5	13.2645	4.6678	1.62116	6.44461	34.8527	Lectin_legB + PK	Plasma membrane	Plasma membrane	+	+				MLFETFVVATLLILLLVPVGRCADATAGSDDERFVYNGFKGANLTLDGASTVTPNGLLVLTNGTIQMKGHAFHPSPLPFRDRGAQNATAARSFSTTFAFAIFGPYIDLSSHGLAFFVSSDRAALSTALPGQFLGLLNSTDNGNGRTHVFAVELDTLFNADFLDRNSNHVGVDVDSLVSRAAADAGYYDDGTGQFRNLSLVSRKAMQVWVDYDSGSTQVTVTMAPLGLARPKKPLLQTTVDLSGVVQGTAAYVGFTSATGILFSRHFVLGWAFAFDGAAPALNISALPALPPAGPKPRPKVLEIVLPIATATLVFAVGVLVYALLRRRARYAELREDWETAFGPHRFSYKDLFHATGGFSDKRLLGAGGFGSVYRGVLRKSNTEVAVKKVSHESKQGMKE…
Zm00001d023253	Legume	4	0.433504	0	0.279571	23.1988	90.1165	Lectin_legB + PK	Plasma membrane	Plasma membrane	+	+	At5g65600, At5g10530	LECRK-IX.2, LECRK-IX.1		MLQRWRPAGRPSGLTTVSRGIYCLCTLLLLLLPSIHVPRARSLSFDLSFSKPQSPGLSQLVNCTGDAYITPDTLELTRNRRDQSSTYSLGRATYMHPVPLWDARTGETASFTTTFSFLISRDPSTFPGDGMAFFLGHFGSSIPTNSSGGMLGLMPAFTNGTGDGTVVAVEFDTFLNHANDDISGSHVGIDVNSLNSTAATDTSSTRNLTSGYEMVATVSYENVTRFLAVQLTIYDTSYNVNATVDLKSYLPERVAVGFSAATGKGGEQHQVLSWSFTSTLQEAPAPAPAPPPRALTPGSSTQQPKKTSSEGTLVVAVLVPLLSLLLACAAAAVLVWWKRRRRRRSSGGIGTSDDDDDDNGHRDQDGSRAELERGVAASGPRRYAYRDLAAATNYFAEDG…
Zm00001d024637_A	Legume	1	43.9496	42.3867	37.5937	20.2803	38.6248	Lectin_legB + PK	Plasma membrane	Plasma membrane	-	+				MAVFDMKSAPLMILELLLVSLGLTIAPFSAEENNDHWFVYSGFANASLTLDNTASITPSGLLELTNGTVMSMGHAFYPTPLRLRDSPNSTVQSFSASFVFGIISIYDDLSSHGLAMLIAPSRTLSALPVQYLGLLSGSNDGNKSNHIFAVELDTYQNSEFKDINNNHIGIDINSMTSVQSNPAGFFHDQDGTFENLTLSSKEAMRVWVEYDRENTQIDVTMAPLAIVKPKRPTVSTIQNLSDVLTDVAYVGFSSSTGKIHTQHYVLGWSFAMNGPAPSIDLSMLPKLPRHHHKSRRSWVLETVLPIATAALLLSLGVVAFLLVRRHVRYAEIREDWELEFGPHRFSYKDLFHATGGFENKNLLGIGGFGRVYKGELPRSRLKIAVKRVSHDSKQGMKEF…
Zm00001d024637_B	Legume	1	43.9496	42.3867	37.5937	20.2803	38.6248	Lectin_legB + PK	Plasma membrane	Plasma membrane	+	+				MLVMAMKHTSFLPYLLLLTTLASCDDQFLLSGFTQSSLNLDGSAIVTNDGLLDLTNSTAITNGHAFYPSPLHFRKSPDGKVESFSVNVVFSIFITYPDLSADGMAFFIAPTKNFSDARAGKYFGLLNENNNGNTRNHIFMVELDTYKNAEVQDINDNHVGININGVFSFKSNTSGFYEDSGAFRELTLNGNKGTQLWIDYDKSTMQINVTLAPINVHKPSRPLLSTTYDLSTVISTSTSYIGFASGASPVNSRHYVMGWSFGMNKPAPPLDVSKLPKLPFHGPKAQSKLLAIVLPIATATLILSIGTIVTLVVRRRLKYAEVREDWEGEFGPHRFSYKDLYHATGGFKNKHLLGEGGFGKVYKGVLPLSNVEVAVKRMSHESRQGMKEFVTEVVSIGRL…
Zm00001d025920	Legume	4	252.821	157.492	223.053	350.108	548.836	Lectin_legB + PK	Plasma membrane	Plasma membrane	+	+			SCW4g	MPHLVLLLFLGLGGLLPAASAADEQFVFDGFKGANLSLDGMATVTPDGLLMLTNGTSQLKGHAFYPAPLRFHGAPDGTAAAMESFSTAFVIGIIGAFEDLSSHGMAFVVAKSTNFTSALPGQFMGLVSSATNGNATNHLFAVEFDTILNSEFDDMSGNHVGIDVDGLNSLDADNAGYYDDATFRNMSLVSRKPMQVWVDFDGRTMQVNVTMAPLEAARRRPRRPLLSTTVNLSSVIDDGTAYVGFSSATGILFCRHYVLGWSFRMNGAAPPLNVSSLPTLPVTAPRPRSRALEIVLPIASAALVFAAAAAVFAFLRRRRMYAEVREDWEASFGPHRFSYKDLLHATDGFSDKRLLGIGGFGRVYRGVLASKTEVAVKKVAHGSRQGMREFVAEVVSIGR…
Zm00001d025921	Legume	5	526.557	410.918	403.581	640.446	866.552	Lectin_legB + PK	Plasma membrane	Plasma membrane	+	+			SCW4g	MGCPRPLLLLLLHAVALAAADEFTYNGFGGSDLLLDGMAAVAPNGLLALSNGTSQMAGHAFHPAPFRLRDGAAAAARSFSAAFVFAIVSNYTVLSDNGMALVVAPSTRLSAFNAGQYLGVLNVTDNGRDGNRVFFVELDTMLNPEFQDMNSNHVGVNVNSMRSLRNHSAGYYDDATGAFTNLSLISRRPMQVWVDYDGAAARLDVAMAPAGVPRPRKPLISTPLNLSAVGADDGTAYVGFSAATGVIYTRHYVLGWSFATGAAAPPLDISRLPALPRFGPKPRSKVLETVLPVATAALVLALVVGAFLFVRRRVRYAEVREDWEAEFGPHRFSYKELYQATKGFKNKMLLGTGGFGRVYKGVLSGSKLEVAVKRVSHDSKQGMKEFIAEVVSIGHLRHR…
Zm00001d028454	Legume							Lectin_legB + PK	Plasma membrane	Plasma membrane	+	+				MLRTCFLFLITLGRLVAALNETALFTFNGFSGANLSLDGMATVTPDGLLMLTNGTTALKGHAFHPTPLRFHGANGRTVASFSTAFVFGIIGQYPDVSSQGMAFVVSASRDFSTALPGHFLGLVNAADNGNAGNHLLAVELDTVLNAEFRDIDDNHVGVDVNSLTSVRAASAGYYDDQTGSFRNLSLISRKAMQVWVEYDGRAMELDVTMAPVEMPKPKKPLLSAVVNLSEVVTDPAYVGFSSATGIIFSHHYVLGWSFKLNGGEAPALNVSMLPALPRTTTGNKTRLKVLEVVLPIASVVFALALATAVVAAAKRRAKFAELREDWEAGFGSHRFAYKDLFYATGGFKDRNLLGRGGFGRVYMGVLPKSKARVAVKRVSHESRQGIKEFVAEIVSLGRL…
Zm00001d028455	Legume							Lectin_legB + PK	Plasma membrane	Plasma membrane	+	+				MFEKSARLTLIATAAMVSVRPISILLLFLLRKIELVSSASAEQFAYEGFTGANLTLDGAAAVTPSGLLALTNDKHTKGHAFFPAPLRFFHGPASSAALRSFSATFVFAIVSEHAQLSDHGLAFVLAPSSNLSDATGAQYLGLLNISDNGKPSNHILAVELDTVLSPEFRDIDSNHVGIDVNSLQSVESHTAGYYEDGTGKFLNLTLMSRRAMQLWVDYGGQAMELNVTLSPLDVEKPRDPLLSTTINLSKIVNSTAYIGFSSATGLSIAYHYVLGWSFSLNGAAPALNSSNLPALPRLPHQKRSLSETLVIVLPFATAGFIIALIIAVFMVMRRWSRYAELHEDWEVEFGPHRFSYKDLFHATKGFGSRQLLGIGGFGRVYRGVLLESNLEIAVKRVSH…
Zm00001d030759	Legume	2	1310.58	750.784	1415.99	1657.38	951.924	Lectin_legB + PK	Plasma membrane	Plasma membrane	+	+	At3g55550	LECRK-S.4		MSSSRKPKTPILLFFLFLLASLAFSQEFTYKGFSASGRGGSPNLNLNGTSATEILPSGILRLTNETSRLFGHAFYPTPLRFLDQKNGTAVSFSTQFAFTVVPEFPTLGGHGFAFVVAPDPRMSGALPSQYLGLLSAADVGNATNHLFAIEFDTVQDFEFDDVNGNHVGVDLNSLISNASAKADPLNLKSGDTTAWVDYDGAARLLNVSIANGTLGKPTTPLISFRVDLSGIFREQMYVGFSASTGVLASSHYLRGWSFRLGAGAAPALDLSSLPSLPQLKSSKNRTSLILAVAFSAFVALVVLAGAGAYGAYRYKNRDIIEPWELDYGPHRFKYAELRRATRGFREREVLGSGGFGKVYRGVLRKSGETVAVKRVNHESRQGLREFVAEIASIGRLRHR…
Zm00001d032868	Legume	4	2.26844	2.4891	8.56343	48.1699	99.363	Lectin_legB + PK	Plasma membrane	Plasma membrane	+	+			SCW4g	MAAKTWQPMILVVMIVGMGVEACGAVEFAYHGFGGAGLQLDGMATVTPAGLLQLTNDTSMPKGHAFHPEPVTFRRPASAMSSFSTTFVFAIVSEFQDLSTSGFAFLVAPSKDMSSAMPNQYLGMFNGTNNGDARDRVFAVELDTVRNPEFADINNNHVGVDVNSLNSSAAAPAGYYDDATGAFRDLSLISREPMQVWVDYDGATTEMTVTMAPAPAPRPQRPLLSTKIDLSTVITDTAYVGFSSASSIVLVKHYVLGWSFSLSGDAPALDYGKLPKLPRIGPKPRSKALTIALPIATTVSVLAAVGVAFLFLRRRLRYAELREDWEVEFGPHRFAFKDLYAATGGFKDDCLLGAGGFGRVYKGVLPGSGAEIAVKKVSHGSRQGMKEFVAEVVSIGQLQ…
Zm00001d032869	Legume	5	32.5947	5.50629	7.70708	61.7408	270.704	Lectin_legB + PK	Plasma membrane	Plasma membrane	+	+				MSASSKRFLPVVVVAAMVAAASGAVEFAYNGFGGAGLSLDGTATVTPAGLLQLTNDTNMSKGHAFHPDPVKFHRPMLSSFSTTFVFAIVSEFLDLSTSGFAFLVAPTTDLSTAMPQQYLGMFNGTDNGDARNHVFAVELDTVRNPEFADINNNHVGVDVNSLNSTVAAPAGYFDDGGGGAFHNLSLISREPMQVWVDYDAATTEVTVAMAPARQPRPRRPLISTRNINLSTVITDTAYVGFSSASSIVLVKHYVLGWSFALDGAAPALDYDKLPKLPRIGPKPRSKALTVALPIATTVSVLAAVALGFVLLRRRRRYAELREDWEVEFGPHRFAYKDLYDGTGGFRDKRLLGAGGFGRVYKGVLPGSGTYVAVKKVSHESRQGMKEFVAEVASIGRLRH…
Zm00001d032870	Legume	5	38.6266	7.24158	7.30706	31.2629	202.492	Lectin_legB + PK	Plasma membrane	Plasma membrane	+	+				MHAIARLPFLLLLFHLHGLSDAAAAAGGHGQFIYNGFTGAGLDLDGMAVVEPDGKLMLTNVTSQLKGHAFHPAPLRFDDGASASASAQNRTLRSFSTTFVFAIVSDYVTVSGNGLAFFVAPSKNLSAASPSQFLGLFNSENNGNATNHVFAVELDTILNPEFRDINSNHVGVDVNGLVSLAAEPAGYYADDDTGAFRNLSLFSGDAMQAWVDYDGGAAVLNVTLAPVESPKPKKPLISVAADLSAVVNDTAYVGLSSSTGPFHTRHYVLGWSFALDGAAPVLDYAELPRMPRVVTKRRSKALDVVLPVAMPLLALAVLACVSFLAWRRFRYAELREEWEVEFGPHRFAYKDLFHAAEGFDSKHLLGVGGFGRVYKGVLPASKTEVAVKVVSHDARQGMK…
Zm00001d034217	Legume	4	442.583	312.098	426.245	680.554	1011.73	Lectin_legB + PK	Plasma membrane	Plasma membrane	+	+				MVDLRSLLVAGVVLLAGLAVLVHGAGDEQFVYSGFTGAPLALDGTATITPSGLLELTNGTAQLKGHAVHPAPMRFQRTPGGPVRSFSASFVFGIIPPYSDLSGHGIVFFVGRDSFATALPSQYLGFLNSSNNGNFTNHVFGVELDTIQSTEFKDPDNNHVGIDVNSLTSANASTAGYYDDGTGAFHDLTLISAKPMQVWLDYDGETAQVNVFLAPLRTPKPTRPLVSAAQNLSGVVVDPAYVGFSSATGTVRSEHYVLGWSFAMDGPAPDIDIASLPKLPRFGPNPRSKVLEVVLPIATAASVLGVVAVVVALVRRRLKYAELREDWEVEFGPHRFTYKDLFRATEGFKTKMLLGAGGFGRVYRGVLPKSKREVAVKKVSHESRQGIKEFVAEVVSIGR…
Zm00001d034671	Legume	4	0.348458	1.91361	16.5926	54.3249	48.8934	Lectin_legB + PK	Plasma membrane	Plasma membrane	-	+				MPAAALAVRVAAVLLLLARGGSGSAPGEFVLSGFASGNVTTSGAAVVTSSGLLQLTNATNEVFGHGFYPVPLRFKDASSTPRSFSTTFVFAMVPRHDDAHGHGIAFALAPSPTVPGAVAGKNLGLFNTSDDTGKARSGVVAVELDTAKDEEFSDINDNHVGIDVNSLVSVSSAPAAYVDAGSLVNISLVSGEPLQAWVEYDGASMRLEVTVAPARKPRPAVPLVSSIVNLSSAVADDTYVGFTAANGAASTSHYVLGWSFRLGDGRATDLDASKLPPVPSSKKKTSRLNLVTLSLVVVVALLLASVAVAALVVRHRRFAEEQEDWEIQYGPHRISYKDLHAATRGFRDAIGQGGFGRVYHGVLQRPVNAEVAVKKVSHDSRQGLREFVSEIASMSRLRH…
Zm00001d034672	Legume		5.41083	12.9244	12.6962	15.723	7.57584	Lectin_legB + PK	Plasma membrane	Plasma membrane	+	+			PCW6g	MAAAVTVAVRVMVPVLLLAPAPAAAAVEFTFTGFARENVTTSGAAATSSGGLLQLTNATNWVLGHGFYPAPLRFKDAASGAPLSFSTTFVAAILPRYLDAHGHGLAFALAPSAAGPGLAVAGKYLGLFNTSDNAGNGTTSEVVAVELDTALDVEFDDINNNHVGVDVHTLRSVASKPAGYVDAATGGSVDVALASGRLLQVWIEYDGATTRLEVTVSPAGVGVPRPRVPLVSCEVDLSSAVADQTYVGFSAANGAASSSHYVLGWSFRLGGGRAPDLDLSKLPRPPPPSGGHKKATELPLLLTLIILVVVVLLVVSAAVTVLVVWRRRRFTEEQEDWEVEYGPHRVSYKDLYAATRGFRDVIGVGGFGVVYRGVHPRPGGVEVAVKKVSHDSRQGLREF…
Zm00001d035476	Legume	3	422.204	509.545	758.131	633.92	559.331	Lectin_legB + PK	Plasma membrane	Plasma membrane	+	+	At5g03140, At3g53380	LECRK-VIII.2, LECRK-VIII.1		MPALASTAMARAAAPILLHLLLLLLLLTDHGPGPAAAVRFDYASLTLGSLRLLGDAHLKNGTIRLSRDLPVPTSGAGRALYATAVPLRGGFSTQFAFTVATLNPSSVGGGLAFVLATDGATLGDAGAYIGVSVATDAAAVEFDTLMDVQFGDPNGNHVGLDLGSMVSAAAADLGGDDAGVDLASGRTINAWIDYRPSSSPSGSAAGILEVFVSYAPKQPPKPVLSAPLDLAEAVKDAAFVGFSASTQGSTEVHAIEWWSFSTASPAPSPRSAAPAPESQALPPPVATPVLPSPLLPGGTTTAPAPPSGSAGAPAASIAPSSGATVGRNAAGSGTPRPPAAVAGAATAGAFVAASFAGVALWALARRARARKRQAALAVGTRRDSSVASAAALARSPREF…
Zm00001d037371	Legume	1	873.186	808.061	246.937	5.75657	14.7908	Lectin_legB + PK	Plasma membrane	Plasma membrane	-	+	At5g55830	LECRK-S.7		MAAAHLRLLPLLLLTLTAAAKNVTLDSAILSFADLTLLGDSFLRNGSVWLTRDTDVPSSSAGTVLCTQPVAFRGPDATASNATAAVASFAARFSFVIANPNAGAAGGDGIAFFISPDRTTLGATGGYLGLFNSSNSAAAKNGSASATIVAVEFDTMANPEFADPSDNHVGLDLGSPVSVTAADLAASGVDLKSGNVTTAWIDYRSADRRLEVFLSSYAVAAKPKRPVLSVAVDLSPYIKEAMYVGFSASTEGSTQQHTIKGWTFQTFGFPPTANSTFESNATSNSSEPAAPAPPPASNAPNSHKRRVGIALGILGPVALALAFIFFAWVSIKKLIELTSRTDAAFSTELVKGPRKFSYRELSAATRGFHMSRVVGKGAFGTVYKAAMPGAAATTYAVKR…
Zm00001d037397	Legume		3.68925	3.02896	2.01479	7.263	12.0687	Lectin_legB + PK	Plasma membrane	Plasma membrane	+	+				MATSKLITITMTILLFLIVGFIPELCVAASSDHEQFVFNGFTGSNLSLDGAARITSTGLIELTNDSARIKGHAFHPSPLRFRRSSDGTVQSFSVSFVFGILSSFGDIRGHGFAFFVSPSKDFTAAYPIQFLGLFNSTNNGSLSNHIFAVELDTIQNTEFGDINDNHVGIDINSLNSLKSYAAGFYNDQNSGRFTNLPLIGSQQPIQAWVEYDGNKTRIDVTIAPLGLAKPLTPLLSLAFNLSTVLTEEEAYIGFSSSTGLSTGHHIILGWSFGMNRPAPAIDSTKLPKLPYLGPRAPSKLLEIVLPIASALFVLVVGTTAVILVRRHLRYKEDVREDWEVEYGPQRFTYKDLSHATKGFSSKHLVGVGGFGRVYRGVLPKSRSQVAVKTVPYNSKQGVK…
Zm00001d037398	Legume							Lectin_legB + PK	Plasma membrane	Plasma membrane	+	+				MANLLQTPFLVPFLLSMALINLVCFTATVSSEDDQFVYSCFSGKNLTLDGAAAVTADGVLELTNRTVHVKGHAFYPAPWRFRRSPGETVQSFSVTFVFGMVPIYSDKCTDGMAFLISPTKDFSGAQESQYLGLLNKTSDGKASNHIFAVELDSSENSEFHDIDDNHVGININSLTSFRSLSAGFYDDDDKNGLFQNLSLVSRKEMQVWVDYNGDTTQINVTLAPLKVNVAKPSKPLLTATYNLSTVLAEDPSYVGFSASTGPINSLYCVLGWSLGINAPAPPIDVAKLPKLPRAGPKPRSKLLEIILPIVTATFIILIGTSIFLFVRRRMKYAEVQEDWEAEFGPHRFPYKDLFHATDGFKNKNLLGLGGFGKVYKGVLPVSKLEVAVKRVSHESRQGM…
Zm00001d043781	Legume		1.57484	1.62987	1.33453	4.59661	5.70215	Lectin_legB + PK	Plasma membrane	Plasma membrane	+	+	At3g55550	LECRK-S.4		MIVPPSSALCLSVLFLLAVSCSADDVDFIYQGFQHANLTLDGSASVLHGGALQLTNDSNRLVGHAFHGSPVRFLEVGGGGRPPSSFSTAFVLDIVTVGSGGGHGLAFVVAPSTVLPGASPEVYLGVLGPTTNGNPANHVLAVEFDTVLDLELNDTNGNHVGVDVNSLVSNVSEPVAYYAGGNAKVPVMLESAQPIQAWIDYDGDSGVLNVTVAPVYVADRPLRPLISTKLDLRPILREEMYVGFSSATGKLASSHYILAWSFRTNGLARSINLRRLPKVPKPRAALSKLVIIKLAAVACAGTLTLIAAAMAILFWLRKRAKLADTLEDWELKHPHRFAYKDLYKATKGFKASELLGAGGFGQVYKGVLRPRCGRDEVAIKRMSAGTTQGMKEFVAEIAS…
Zm00001d044639	Legume	5	39.1381	10.7941	15.9222	44.3403	103.375	Lectin_legB + PK	Plasma membrane	Plasma membrane	-	+	At5g65600, At5g10530	LECRK-IX.2, LECRK-IX.1		MAACRPSGLSVLCSLYRLYICMLFIHVPRAHSLSFDLSFSKPQSPDLSSQKINFNGDAYPTPETLELTRNQHDQSSTNSIGRATYAQPVPLWDGATGETASFTTTFTFRIRPDSWSPYPGDGMAFFLGHYGSDIPVQSGGGMLGLVPTHTNGTGNGTVVAVEFDTFQNPTNDDISSNHVGIDVDSLNSTASTDTTSPTKNLTSGYLMAATVRYENVTRLLALELTVNDTSYYVNATVDLKGYLPERVAVGFSAATGNGGEQHQVLSWSFTSTLPEPPAPAPAPPPHATPDNNQPPKKKRSVGTTGLIIAVLVPLLSLLACAAGVLARRKLRGRRRRRPPNGSSDDDNDYQEQDNGSRAELERGVAATGPRRYAYRDLAAATDNFAEDGKLGRGGFGSVY…
Zm00001d044977	Legume							Lectin_legB	Plasma membrane	Plasma membrane	-	-				MPAASVWFDSVARVAPSGLLVLTNVTVAMTDHALHLIPLPFCESASNSTVWSFSVLFLFTIVGQSFHLSSHELAFFISRTRSLSTTMSIQYLGLLNITDGAEATSNHILVVGFDTVLNYEFGDINHNHVDIDIDSLWSVI
Zm00001d045838	Legume		1.06799	2.00222	2.46579	4.85549	11.907	Lectin_legB + PK	Plasma membrane	Plasma membrane	+	+				MVANQNITLFILSVGLSIAGFTAGDDDQFVYTGFASSNLTLDGGATVTPSGLLELTNGTVRQKGHGFHPSSVLFYESSSGAVQSFSVSFVFAILSTYPETESGHGLAFFIAPDKNLSGSFPTQYLGLFSDQTNGDPNSHIFAVELDTVQNYDLQDINSYHVGINVNSLRSIRSHDAGYYDDKSGLFKDLSLDSHEAMQVWVNYNRETTQINVTIAPLNVAKPVRPLLSANYNLSAVITNPAYIGFSSSTGSVSGQHYLLGWSFGINSPAPPIDITKLPEMPRLGQKARSKALQITLPITILALFLAASITIFLFVRRKLRYAELREDWEVEYGPHRFSYKDLFDATRGFREANLLGTGGFGMVYKGILRGSRLNIAVKRVSHDSKQGIKEFITEIVSIG…
Zm00001d045839	Legume	4	12.1878	13.3076	14.309	16.3771	16.2403	Lectin_legB + PK	Plasma membrane	Plasma membrane	+	+				MPEKKHKWLILYHLLYLSILNFTSFIIAGDQFVYSSFREANLSLDGTATIKPDGLLELTNGSFNLKGHAFYPTPLHFRKSSGENVKSFSVTFIFSILSAYPDKSADGMTFLVTTNKNFSDAFPAQYLGLLNDQNNGNPNNHIFAVELDTIQNSEFEDINDNHIGININGLHSVQSQGAGFYDDKNGMFKNMSLISREVMQVWVEYDGWTTQIDVTLGPIKMAKPNRPLVSAIYNLSTVLTDTSYIGFSSSTGVINSRYCLLGWSFSMSNTTPEIDITKLPKLPRVGSRSPSKVLTIILPTAIASFIFVTGITIILLARRKLANNELQEDWEVEFGPHRFTYKDLFLATEGFKNKNVLGAGGFGKVYKGILPTSKLEIAVKRLSHNSKQGTKEFITEIVS…
Zm00001d046424	Legume	5	4.20064	3.66069	3.90269	10.1495	57.0868	Lectin_legB	Plasma membrane	ER or Plasma membrane	-	-	At5g65600, At5g10530	LECRK-IX.2, LECRK-IX.1		MAKSTPLLSFVYLLCIAHVTSISFDYNFSIPGVLTSANIKYMSNGSRGTDRIDLTKDAIWSTGRVAYGQPLQLWDDTAKVASFTSNFTFAIKPHNSTNQATYPKKLLFKLSPCSQLGDTCCALQADGMAFYVGPWPPKLPEDSNGGFLGLFNNPIGTNIDFPPTIAVEFDAFRNDWDPNNTMNHIGVDVKSITSRAYTPLPDGSFNGTMSAWVRYDANVSTLSATLRFDDLPQLGLYNVSAIVDFKDAGLPPYAAVGFSGATGDFIERHQILSWSFESTLTGVVVNVNNTGKCLSLSLLSLAILLQKEN
Zm00001d049741	Legume	2	371.603	540.141	2019.21	2006.47	175.539	Lectin_legB + PK	Plasma membrane	Plasma membrane	+	+				MARARFLLHLLVLSAACVSTNAAATGFSFSRFVSADRGANVTVLGDANIDQGALQITPDSLNDAATYLTHKSGRVLYATPFRLWHREEAGGRHGSSSKLANTTAGGKRVASFSTVFTVNVFRPNGTEPAEGLAFVIAPSAEGPPAGSSGGYLGLTNASTDGDAANRIVAVELDTEKQPYDPDANHVGLNVHSVVSVATASLTPLGVQISPAAPATKYDVWVDYDGAARRVAVRVAVAGTAKPPRPVLAAPLDLGAAVAEWSYFGFAASTGRKYQLNCVLAWNMTLEKLPSGDDGGGRRRALGLAVGVAVGVAVGVAAVAVVLAYVCVAKRRKARSGEGSGSAITGTMIRSLAGGPREFEYREIRRATNNFDDRMKLGQGGYGVVYRGVVVGDHTSPGGV…
Zm00001d050829	Legume	5	14.2748	8.90132	4.26149	8.13852	21.7693	Lectin_legB	Plasma membrane	Plastid	-	-			SCW4g	MQSTTFTGRETTSFSFPKFNQNRLQLSTNLTFTGNSTVSQGALQVTPNSGNNFSTYLANQAGRVFYSTPFVLWAAAANSNASSVVADGRRVASFSNGFAAVELDTMKQPYDPDGNHIGLDVNDVRSSSATCPLAALGIELAPGDTGASDGSNFVWVDYDGAARRLQAYISPNGTKPSAAALNASLDLSAVVAARDAYFGFSASTGTDDYQLNCVKMWNMTVEVLHDDDDDDRLPKKLSG
Zm00001d051615	Legume	4	465.917	327.622	409.024	987.722	1556.1	Lectin_legB + PK	Plasma membrane	Plasma membrane	+	+			SCW4g	MTTGPWRWCHGVRATASLALLLLLACVSGRSVTCARAQSTAFTGRETTSFSFPKFDQNRLQLSTNLTFTGNSTVSQGALQVTPDSGNNFSTYLANQAGRVFYSTPFVLWASNASSAAAAGRRVASFSTVFQFNLYRTNASVKGEGLAFVVASAIADPPPGSHGGFLGLTNASTDGLGANGFAAVELDTVKQPYDPDGNHIGLDVNGVRSSSATCPLAALGIELAPADTGASDGSNFVWVDYDGAARRLRAYISPNATKPSAAALDASLDLSAVVAARDAYFGFSASTGADDYQLNCVKMWNMTVEVLHDDDDRLPKKLSGWKLGLAVGAPCAAALAALALLAGLYLMKKRRKVGDDPSSVSHSAIDLRSIPGVPKEFDYEALRKGTNGFDDKMKLGQGG…
Zm00001d052906	Legume	4	188.781	63.8148	135.74	434.761	575.788	Lectin_legB + PK	Plasma membrane	Plasma membrane	-	+			SCW4g	MAVAACGGGGGRGRSPLSRLSPQLGCLLVVSLLCLRAAVVCRAQVQEQGQLQPLPALEIETYNYTSFDEGNSREQRELAFSRDARIYQGAIQVSPDTGNVGSYQDIMVNKSGNVLLQRRFTMWRRLDSGNGNGTGAPPRVQVVSFNSTFSINVFHLPDSSPRPGEGLAFVVAPSRAEPPPGSYGGYLGLTNATLEASSGGGPARSRFVAVEFDTLKQDYDPSDNHVGLNVGSVVSVATADLTAFRIATNSTGPANYTAWVEYDGAARRVAVYMAVRGEPKPAAPVLDSPLDLSQHLPEQAYIGFTASTGADFELNCVLDWALSIEIIPERKSRAWVVAVAAAVPAAAIAASVAAFFLARTLRARRAVEKRQERLERRLTNLPGMPRVFAYDKLRKATGN…
Zm00001d053322	Legume	4	0.216752	0	0	11.0402	58.2603	Lectin_legB + PK	Plasma membrane	Plasma membrane	-	+				MSSLLKLVVFLGLTFATSFARSNDPMFAYNGFSNTNLELDGTASITENGLLELTNGKVMSKGHAFFPDPLRFRRSPNSTVQSFSASFVFGIISVYNNLSSHGLAMFVAPGKDFSAATPVGYLGLFNAQNDGNGTNRVFALELDTYQNSEFQDIDNNHVGINVNGLHSVESHAAGFYRDRNGTSESFEDLTLCSQQAMQVWVDYDSESARISSTVAPLNTARPKRPTVSASYNLSAVLADVAYVGFSSSTGKINSRHYVLGWSFAMNGPAPAIDTSSLPKLPLARSKPHRPVLEVVLPVATAALLVAAGAVVFLSVRRHIRYAELREDWEVEFGPHRFSYKDLFRATEGFGDKNLLGTGGFGRVYRGVLPRSKLKVAVKKVSHDSKQGMKEFIAEVVSIG…
Zm00001d009376	LysM							LysM + PK	Plasma membrane	Plasma membrane	+	-	Glyma.08G283300, Glyma.01G027100			MTAFFHDTQYEVEPGDTPDNVKSNNFSGLAMNVGDGRTLIAGTTIAVHLPCGCSSTAPEGVLSYSVQEEDTLSTIASLFSSRQQDILNLNPILRNADFIRTGWILFIPMGVAGSSKKGIGSMRIIIAASVSAAVLLFCVLAVILRRRRRSSQHNVEAPEIKMERAPSNTSIAALESRFFPTMRTNDTDPFQTERPVIFSLKQVGDATADFSEKRKIGEGGYGSVYLGFIGAHEIAIKKMKASKSKEFFAELKALCKVHHINVVELIGYAAGDDHLYLVYEYVQNGSLTDHLHDPLLKGHQPLSWTARTQIALDAARGIEYIHDHTKACYVHRDIKTSNILLDNGLRAKVADFGLVKLVERSDEEEFVATRLVGTPGYLPPESVLELHMTTKSDVYAFGV…
Zm00001d012613	LysM							LysM	Extracellular	Extracellular	+	-	Glyma.07G190500, Glyma.08G058700			MANHGAAALLLIASVLAAAALSGADARLTVRPNMAAALRAANGRFAVRPGTKVTLRRDAHGGYVVDVAAVPDLTCNTVRGVQADETCFSVAQGAGLTQDQFLAFNPNINCAKIFVGQWVCLDATTSA
Zm00001d013983	LysM	2	302.875	392.237	579.489	404.001	298.117	LysM	Nucleus	Mitochondrion or Nucleus or Cytoplasm	-	-	At5g23130, At5g08200			MIRPHLPKDPAFPRTNGSLDGGARGLGEIEEVGAAATVAVEQSPSQSSSPSASSPAAAMSSCGQYMLHRVRKLDTLAGVAIKYGVEVADIKRLNGLSTDLQMFAHKTLRIPLPGRHPPSSYQQNGSYESDDRECTPRRIHDDILESILKTPNSKVSPAMSLLQGYYGLEPPPKRDQTSEGTEMAVHSKGKSAFLDVEPWLEPPNSDPFPLQNRKNRSLMIGSFLDGGTDENGDSERFIRRRQKADGELLPREENGGDFLASVGKGLALRPKSSNRPDMNKSQQNLFAMAEPLFGNGLQTVRKSSSTPEFQEPETNTSSSIWSASKWSINTDAFALPLPIPRFDNIPKPIAAWRNKPARD
Zm00001d015884	LysM	4	23.8362	12.7133	24.8295	68.7282	125.308	LysM + LysM + PK	Plasma membrane	Plasma membrane	+	+	At2g33580	LYK5	SCW4g	MMASPPQTELQAVALALLVLLLAGAAPARAQQEYEANKQNACYATNASSVLGYTCNATTASTPACDSYLIFRSSPTYYNTPVSISYLLNSSVSATAAANAVPSVSPLAPSSLVLVPVPCACTPGGYYQHNSSYTIQFRGETYFIIANITYQGLTTCQALIAHNPLHDSRGLVAGNNLTVPLRCACPSPAQAAKGFKYLLSYLIMWGDDVTSIAARFRADPQAVLDANSLTADDIIFPFTTLLIPLKTAPTLDMLASTAPPPAPTPPQPAPAPSGRSGSGKLVGFGVGLGCGALALAGILGLLFLRARRRQRLPVGESVRQGSKVVIDVSSSADYGALASGKKITNTTTSSMSSAAWSLVASDVRGAVESLTVYKYSELEKATAGFAEEHQVPGTSVYRA…
Zm00001d017613	LysM	3	305.836	378.256	467.643	298.848	454.444	LysM + LysM + PK	Plasma membrane	Plasma membrane	+	+	Glyma.02G000400			MRPPALRLSALLLFLCLYAAPARSQNATTVTAAPASVEGFNCSVNRTYPCQAYALYRAGFAGVPLNLAAIGDLFAASRFMVAHANNLSTAAAPATGQPLLVPLQCGCPSGSPNSYAPMQYQIASGDTYWIISTTKLQNLTQYQAVERVNPTLVPTNLDVGTMVTFPIFCQCPAAADNATALVTYVMQPGDTYSTIAAAFSVDAQSLVSLNGPEPRTQQFAEILVPLRRQVPGWLPPIVLRNNASATPAAPPPSASPNATVVRNDRNGVVTGLAVGLGVVGALWLLQMLLLACLCRRLRANGRRGDAVLSGDGVEGGVFAKGSSAAAAGGGERFLVSDMSEWLDKYRVFTVEELERGTGGFDDAHLVNGSVYKANIDGLVFAVKKMKWDACEELKILQKV…
Zm00001d018201	LysM	5	158.085	56.6902	62.2084	156.65	155.637	LysM	Plasma membrane	Plasma membrane	+	-	At1g21880, At1g77630	LYM1, LYM3		MAAESRGFVMAAVMVVAAVVAVVSVAPCGAEAKTTIEPCSGSDSCPALLGYTLYADMKVSEVAALFAVDPAALLAANALDFGAPGAAHRILPMGLFVRVPTRCSCADGVRKSVSVRYAARPADTLATVSDVVFAGLASSDQIRNENGLTSADPDAPLDAGQKLAIPLPCVCFNSSDNNLPAVYLSYVVQVGDTVPAIAASYETTVTDVMNVNAMGSPVAAPGDILAIPLPACASTFPKSASDHGLIVSNGTYALTASNCVQCSCGPGSLNLYCTPTSLSGTCPSMQCPNSDVMLGNVSTHPTGAGCNVSACSYGGFVNGTITASLTAGLQARCPGPRQFPALTEPPTTVSHDSTYLPPLSAPGPAEAGGVMPEPGSPGPGASVQAGPFTLPKVSKANGP…
Zm00001d019175	LysM							LysM	Plasma membrane	Extracellular or Nucleus	+	-	Glyma.02G000400			MATAAPASVKGFNCAANRMYPCQAYALYHAGFAGVLLDLTAISDLFVVSRFMVAHPNNLSTTAAPANEQPLLYQIGPGDTCWIVSTTKLHNLTQYQAMERVNPKLVPTDLDVGTMVTFPIFCQCPAAADNATTLVTYVMQPGDTYVSVATAFSVAYP
Zm00001d020691	LysM	3	130.531	841.353	2942.03	2065.43	386.339	LysM + LysM	Plasma membrane	Plasma membrane	+	-	At1g21880, At1g77630	LYM1, LYM3		MRAAAASLVLVPRLALFVLLLSGSGVPTALSKSTLESCASSSACPALLSYTLYADLKLAELAALFAADPLAILAANAMDFAVPDPGDRILPAGLALRVPVPCACSDGIRKATSARYVARAGDTLASVAGSVYGGLTTADWIRDSNGMAEEEDAALDAGTTLFVPLHCACFGGADSGAPAVFLTYPVAEGDTVPAIARRFRTTGNDLMSVNDLATADVAAGDIIVVPLPACASSFPAFASDAGLAVANGTYAVTANRCVQCSCGPGNLDLFCVPAPLADSTCSSMQCSNSSMMLGNFTLLMTSAGCSVTSCSYGGYANGTILATLTTSLKPQCPGPHQFPPLMPPPTSSFFETYLGPSPTPMASEGGMGPQMAGMAPTSSPPVSSGPPTAGSHVGSDALA…
Zm00001d021447	LysM	1	2832.72	1070.62	101.214	19.8835	7.29789	LysM + LysM	Plasma membrane	Plasma membrane	+	-	At2g17120	LYM2		MAPLPASLMPCLWLFLCLLAAPCPAARAARFACNATAPRASTCQALVSYAPPNGTATPTLAAVRALFQLRSHRALLAANGLPLSTPPTAPAPVPLRVRLPCLCSGGAGATFQRPTYRVRAGDTLDAVARGVFAGLVTYQDIAAANNVSDPNRVAVGQQLWIPVPCSCDLVGGQPVVHFTYVVPAGGSVSSIAEEFGTTEETILTLNKMPDAKSLLAGQVLDVPLRACSSAISSTAIDRNLLVPNGSYILTANNCVKCGCSSSTWQLDCQSTQGLSSSFCPAAKCGDMFLGNTSSSTSSCESTACSYAGYTNSTSFAILANVTTTNVCNAGMTPTAQPAHSSALRLEPVWLRWTELVALSLFTLSFFV
Zm00001d026072	LysM							LysM	Extracellular	Extracellular or plasma membrane or ER	+	-	At4g25433, At5g62150			MAEAEASSRRRRCGGAAELCATAARLADAASWWCAVALVALVLLGALRAETDGVGDGDGGGAYRALRGPRLGGPAARPCEEVYVVGEGETLHSISDRCGDPFIVERNPHIHDPDDVFPGLVIALCPTRNT
Zm00001d027325	LysM	4	157.416	176.259	661.046	1355.51	875.747	LysM	Nucleus	Cytoplasm	-	-	At5g23130, At5g08200		PCW6g	MGVKQVLVRPRYGDEDVVDQSPPPPMSSSPCGRYVHHRVCRFDTLAGVAIKYGVEVADVKRANGLTTDLQMFAHKTLRVPLHGRHAPSPPSSSPSHAARFLMALTHVSDVRPSTTWFCFREWTKNAASLDPLLKLKPPRSTVSPSMSLLLQGCHGLTPAPKGDLNLTDECAQGHHRKAGSLSSTLLPRRAGQGLALRPKSGGRADTNGIQQDLLAAWVPSYGDGLRAVKRSSSAPEFQDSDSVSLASAWLKSKWNLKPDYAFTLALFDGISKPLLDSIPKPLLDNIPNSIVAWRNKAARD
Zm00001d027375	LysM	1	259.999	259.998	77.7652	27.4197	87.7407	LysM	Extracellular	Extracellular	+	-	At5g62150			MAGRRQIKKEWVQAAADAASWCVALSLVAMLVVVCTLGAGEGGGGAPVVVVRGAALSARPCEEIYVVAEGETLHSISDKCGDPLILERNPHVHDPDDVFPGLVIRITPSKPR
Zm00001d027533	LysM	4	365.513	335.522	538.792	1052.28	1969.33	LysM + LysM	Plasma membrane	Plasma membrane	+	-	At2g17120	LYM2	SCW4g	MSPFAARVASLAALLLALLLAAPASAANFTCATVGKTCQSAIGYAVPNATTYGELVARFNATTTLAELLGANGLPATTPASTPLAAKATVRVPFRCRCGSNGVGQSDGGPFYVVYPLDGLDHIAREVFGGFVTYQEIATANNITNVNLIVVGQKLRIPLPCTCDQVDGADVMHFAYSVAKGDDPPGIAARFGVTETTLLSVNKITDPKTSLQQGQILDVPLPAKVISQSRLPSVLTVRANSVLPVCKSSVGNASADYNLLVPNGTYVLTADDCIQCSCSASNYEHLDCTPVKGGRCPAVPPCSGGLTLGQVNGTGCASRMCAYSGYTNTTSLTIHTSLVPANETACQNGGAARAEFAGSVLRTSLIAFLMSLILICLL
Zm00001d028286	LysM	5	58.6941	18.8613	14.6907	19.948	188.211	LysM + LysM + LysM + PK	Plasma membrane	Plasma membrane	+	+	Glyma.02G000400			MELRHFRCCASRLLLLVTLLLGFRRAGAQDSTSYTVPAQFACDVSSPCDTYVVYRTQSPGYLDLGSISDLFGTSQARIASANGLSSEDGVLQPGQPLLVPVRCGCAGAWSFANVTYPIRQGDTFYNLAKASYENLTEYHLIQNLNPGSEPTSLQIGQEVTVPLLCRCPARAERSRGVQSLITYMWQAGDTMSQVSKLMNATVDEIAEANNVTANTSASASFVGQPMLIPVRQRPRLPAPLYAAAAADGKSRSRRRAAVIGASVSGSLVALAALFVAILARRRYRKKPSMRLGSRFAVNTKLSWSRNQFGHDGSNSFAHVMKGGKLLTGVSQFIDKPIIFVEEEIMEATMNLDERCKIGSTYYRAKLDGEVFAVKPAKGDVSAELKMMQMVNHANLIKLA…
Zm00001d029681	LysM	4	1.55936	3.46808	15.0632	106.692	244.787	LysM	Extracellular	Extracellular	+	-	At5g62150			MAAQRRWSGAADVASWCALLALVMVVGSLAGSGKEEPEQYSRAGLVVVRGPRLAARPCDELYVVAEGETLHSISASCGDPYILERNPHVHDPDDVFPGLVIKITPHAGGSPNSGDAN
Zm00001d031676	LysM	4	538.312	401.072	1007.76	2092.27	1766.32	LysM + PK	Plasma membrane	ER or Plasma membrane	-	-	At3g21630	CERK1		MARILMRLLLLAAAAAVAAGDGCLNSGCVALGSYLVARNQNLTYIASLFGIGDYHALARYNPGTTNLDYIQAGQSVNISFTCGCHTFPNSDATYLGGSFPHKVVTGDTYGGIAQNYNNLTSAAWLAVTNPYPTNNIPDTNTVVNVTVNCTCGDPKISSDYGFFLTYPLMGQTLAAVAANYSFNSSSQLDLLRKYNPGMDTATSGLVFIPVKDGNGSYHPLKPPGRKKANKAALLPSSEDSTQLATTSMDKSALSTSQADSSSGVPGITVDKSVEFSYEELFNATEGFSMSNKIGQGGFGAVYYAELRGEKAAIKKMDMQASHEFLAELKVLTHVHHLNLVRLIGFCTESSLFLVYEFIENGNLSQHLRGTGYEPLSWAARVQIALDSARGLEYIHEHTV…
Zm00001d032656	LysM	2	96.7897	120.421	171.044	88.9317	49.4239	LysM	Nucleus	Mitochondrion or Nucleus	-	-	At5g23130, At5g08200			MSRPHLPKDPAFPRTNGSLDGGARDLGEIEEVGAAATVDVEQSPLQSSSPSASSPPAAAISSCGQYMLHRVRKLDTLAGVAIKYGVEVADIKRLNGLSADLQMFAHKTLQIPLPGRHPPSSYQQNGSYESDDRECTPHRIQNDILDSILKTPKPKVSPAMSLLQGYYGLAPPPKRDQTSEGTEMAVYSKGKSAFLDVEPWLEPPNSDPFPLQNRKTKSLTIGSLDGDTDENGDSERFVRRRQKADGELLPREENGGDFLASAGKGLALRPKSSSRPDMNKSQQNLFAMAEPLFGSGMQTVRKSSSTPEFQEPETSTSSSIWSASKWSINTDAFALPLPIPRFDNIPKPIAAWRNKAARD
Zm00001d033621	LysM	3	86.4973	112.603	193.48	220.296	174.627	F-box + LysM	Nucleus	Nucleus or Cytoplasm	-	-	At1g55000			MDSRVVDGAGGGADASLPADPPSPVPDPAAGGMDARLPSDLLRAVLQRLPPIDLARSACVCRAWRAVASDRAVVEAAFCAPWGVRRVVGEPATGAFWRAASLGRFALSHAIRRGDTVPGVALKYSVQVTDIKRFNNMMSDHGIYSRERLLVPISNPEILLGSTCYIEMDHNAKREVAIFYPEGRPGGKTDSVASIVSAERRNKRILESVRRSLHVDDGTAAYYLSVTEGDPRAAMTEYSEDLRWEQQRAGR
Zm00001d036338	LysM	4	112.043	82.3067	223.812	663.333	1002.55	LysM	Nucleus	Cytoplasm or Nucleus	-	-	At5g23130, At5g08200		SCW4g	MGISHPLSDEYDALRGAVLSPDTTPPSSPLAHRHLLEHEVTRMDTLAGIAIKYGVEISDIKRANSLVTDSQMFAHKSLLIPLPGMPMPSLNACGQRTIRTCAPNHRQKRDAPKSRQQGASSAMNTLQRYYGLTPPQKGGNTMDSSTELSVYHKGGGFQSNLSETLLNPSAAPGTDSSWNFEALGFSATEGDGGAPKPEQDGSMRRRQKVEAESNAQGDFLVKAIKSLLISSVRLDTYAGSPGSSQKSGFRSVTVRKSPSAPSFADADNGVSMWSSSKWTFSHDSFTRPLLDGLPKPASARRTNQNRVGLKLN
Zm00001d037151	LysM	1	1099.32	911.767	636.929	464.585	413.309	LysM + LysM	Plasma membrane	Plasma membrane	+	-	At1g21880, At1g77630	LYM1, LYM3		MATPPTALLLLLAAAAAFHGATAKTTIEPCSGADACPALLGYKLYADMKVSEVAALFGADPAAVLAANALDFASPGAANRILPAGTPLRVPTRCACADGVRKSVAIRYAARPSDTLGSISEVVFAGLPSADQIRTANGLAAEDPDAPLNPGQELVIPLPCVCFNSTDNNLPAVYLSYVVQVGDTVESIAASHTTTVTDISNVNAMGSPIVAPGDILAIPLSACASAFPNSASDYGLLVANGTYALTAGNCVECSCGPANLNLYCTPSSLSASCSSMQCSNSSLILGNVTAQPTTGGCSVSSCNYDGYVNGTIATSLSSGLQPMCPGPHQFPPLTAVPTAANHGSYSPSPAPGPGDAGGATPGGSSLSPSNEPAGNSSQAAAINQPCRFLLIFILSVTLS…
Zm00001d043265	LysM							LysM	Extracellular	Extracellular	+	-	Glyma.07G190500, Glyma.08G058700			MASRGSAALVVACLLVAVTVAAAVPPPVSVSQLFCRKVYGMHERETCFAVAQAAGLTLKQFLRFNPNVNCRKLFIGQWVCLDAILVS
Zm00001d043467	LysM	5	29.7809	12.5894	12.1648	31.2844	33.7813	LysM	Plasma membrane	Extracellular	+	-	At1g21880, At1g77630	LYM1, LYM3		MAKSRGFVMAAVMVVAVVVAVVSVAPRGAEAKTTIEPCSGSDSCPALLGYTLYADMKVSEVAALFAVDPAALLAANALDFGAPGAAHRILPMGLFVRVPTRCSCADGVRKSVSVRYAARPADTLATVSDVVFAGLASSDQIRNENGLTSADPDAPLDAGQKLAIPLPCVCFNSSDNNLPAVYLSYVVQVGDTVPAIAASYETTVTDVMNVNAMGSPVAAPGDILAIPLPGRST
Zm00001d043516	LysM	3	383.69	438.633	1299.76	1932.77	716.962	LysM + PK	Plasma membrane	Plasma membrane	-	+	At1g51940	LYK3		MPPHRLLPLLLLLLPLGVSGAAAAGGNATSAPLPCSELSRVCTAFIAFPTAGAGPANATVLESMFDAAPGDLTADAAASPRYAFVRKNCSCLPSRTYLANTTYTIPSSATTSFPNTTAADVAAAAYSGLAVPPPGGAAQRPPRPGAVVALHLLCGCSSGPWNYLLTYVGVEGDTVESLSSRFGASMDAIETANAMAGPDPITAGKVYYIPLNSVPGQAYVTLPAPPAPAPAPTDYTLSGTPDYHSSKFPYGWVIGSMGVALALIVIAVLALVLWKFFGYKPQDRNGQRKSPDRHKFQLLKSGSFCYGSGRYLCCQFGNAKPTRADGGEHHINVPKGVAADVFDREKPIVFTHEEILISTDSFSDANLLGHGTYGSVYYGVLREQEVAIKRMMATKTKEF…
Zm00001d044536	LysM							LysM + PK	Plasma membrane	Plasma membrane	+	+	Glyma.08G283300, Glyma.01G027100			MTKHGLLFFLAIALLLHRHYTSASSTGQPTRSSSTASRSTAEWQPLHCSPVSSCGSFLYVTPGGRNLSEIASVFNGNASLIQPVKRLSGSEDLLMAVACECQAISNTTTAAAFLHDTQYKVEPDAIPDDVKSNTFSGLAMDVGDGFPLTPGATVTVRLPCGCSSSTASKGVLSYSVQEEDTLSTIASLFSSSPEAILNLNPSVKNPDFIKPGWILFVPMGVAGSSKKKRVGSTTITIAASVSAIILSVCVLTVILRLRRRPSQQNAEAPEIKMERAPNIDPFQTERPVIFSLKVVGDATANFDEKRKIGEGGYGSVYLGFIGTHEIAVKKMRASKSKEFFAELKALCKVHHINVVELIGYAAGDDHLYLVYEYVQNGSLSEHLHDPLLKGHQPLSWTAR…
Zm00001d045832	LysM		4.66946	2.70033	2.12207	4.68281	5.09439	LysM	Plasma membrane	Extracellular	+	-	At1g21880, At1g77630	LYM1, LYM3		MVKSRGFVMAAVMVVAAVVVVVSVAPRGAEVKTTIEPCSGSDSCPALLGYTLYADMKVSEVAALFVVDPVALLATNALDFGAPGAAHRILPMGLFVRVPTRCSCADGVRKSVSVRYTACPADTLATVSDVVFAGLASSDQIRNENGLTSADPDAPLDAGQKLAIPLPCVCFNSSDNNLPAVYLSYVVQVGDTVPAIAASYETTVTDVMNVNAMGSPVAAPGDILAIPLPGRST
Zm00001d048016	LysM	5	3.94582	0	0.264509	18.4452	334.394	LysM + LysM + LysM + PK	Plasma membrane	Plasma membrane	+	+	Glyma.02G000400			MEPRHFCRALLLLLVVLLLGFRRAGAQDSTNYTVPARFACNVSSPCDTYVVYRTQSPGYLDLGSISDLFGTSQARIASANGLSSEDGVLQPGQPLLVPVRCGCTGAWSFANATYPIRQGDTFYNLARLSYENLTEYHLIHDLNPRSEPTSLQIGQEVTVPLLCRCPPARAVQSFITYVWQPGDTLSQVSKLMNATADEIAEANNVTSSSVSSASAAGLPMLIPVQQRPRLPPLLYAASAGEGRSSRSRRRALIIIGASVSGSLVALAALLVAIMAQRRYRRKKPSMRLGSPFAVNTKLSWSVNQYGHGSSNSFAHVMKGGKLLTGVSQFIDKPIIFVEEEIVEATMNLDERCKIGSTYYRAKLDGEVFAVKPAKGDVSAELRMMQMVNHANLIKLAGIS…
Zm00001d048521	LysM	4	77.7286	76.0476	141.378	192.349	331.64	LysM	Chloroplast	Nucleus or Cytoplasm	-	-	At5g23130, At5g08200			MGVKQVLVRPRYGDGDGDDDGGTSSSSSTGRCDEDVVDQSPPPMSSCGRYLLHRVCRFDTLAGVAIKYGVEVADVKRANGLNADLQMFAHKTLRVPLHGSHQPAAAPPSLPSYSPRNHADRVASPFTGQITSLEVGRFGHTPLRTGDVGRAVFHREWTTRRPPKNAASMDPFLKPPRSTVSPSMSLLQGYYGLPPTPQENLTYEGTEMATYAQGHHRKARSLSSSEHGDGADDAEKPIRRRQKADSELTTGREDNGGCLLPRAGQGLALRPKSGSRPDGNGSQLDLSATWVPSYGDGLHTVKKSSSTPEFQDSDSISIASEWLKSKWNLKPDAFTLTLPPLPLLDSIPKPLLDNIPNSIAAWRNKAAKD
Zm00001d053120	LysM	4	73.7231	70.3901	86.2738	270.524	501.531	LysM + LysM + PK	Plasma membrane	Plasma membrane	+	+	Glyma.14G077700		SCW4g	MNFSTWKTKEVQVRSFTTRKPTPQAACAMASFHDLTATAVLLLLFSILSGGLAPLQVQAQQPYGSQIADCTNQHNSSSLLGYFCGAAGSAPSCPTFLTFTARAQYSSLATIGALLGADPASVLAPNEATGADAPLPAGTRVLVPATCACTATPGGRFYQRNATYVAVAGDTLLIIANNTFQGLTSCQALEAQALRGAPPQSLDVGQSLPVPLRCACPSAAQAAAGARYLVSYLVDVFDDLTTVAARFGVDMGTVAASNQLQPPFTIDPYTTLLIPVSAQPNVSRIQTPPSPPPPPPVVARAPAPGKKSSNHVGVYIGVAVAVVVVAAIVSAGAFLAVRARRRRAGAVLATGEVAKKESKAGNDRAATSSGFTGGEFSLSTSEAFSSISVTDIKSSLKVY…
Zm00001d053695	LysM	5	160.309	85.7847	85.1171	246.904	744.054	LysM + PK	Plasma membrane	Plasma membrane	+	+	At2g33580	LYK5		MAPPPQPELPAAALALLVLLLAAAVPARAQQEYEANKQNACYATNASSVLGYTCNATAASTPACESYLIFRSSPSYYNTPVSISYLLNSSPATVAAANAVPTVSPLAASSLVLVPVPCACTPGGYYQHNSSYTIEFQSETYFIIANITYQGLTTCQALIAQNPLHDSRGLVAGNNLTVPLRCACPSPAQAAKGFRYLLSYLVMWGDGVPSIAARFRVDPQAVLDANSLTADDIIFPFTTLLIPLKAAPTPDMLASPAPPPSPTPPQPTPAPSGGSGSGKWVGVGVGLGCGALALAAILGLLFLRTRRRRGQRFADGESVRQGSKVVIDVSSSAEYGALASGKQTSNTTTSTTSSATRSLVASDVRGAVESLTVYKYSELEKATAGFAEERQVPGTSVFR…
Zm00001d002312	Malectin	5	75.5801	36.9766	26.5645	75.9121	51.1491	Malectin + PK	Plasma membrane	Plasma membrane	-	+	At1g56120, At1g56130, At1g56140, At1g56145			MYQRDDANLGAASYYVTGAQTWGVSNVGKFTEAVYESYIISSSRQFYNTLDPELFQTARMSASSLRYYGIGLQNGNYTVALQFADFDFEDSQTWQSVGRRIFDIYLQGERKEKNFDIMKAAGGKSYTAVEKQYIVPVTRNFLEIHLFWAGKGTCCIPFRGYYGPAISAFSVTPNFNPTVQTSRKTGIIVGVVVGAAVLGVLALAGLCMRRQKRRKLLLEQQELYSIVGRPNVFTYGELRTSTENFSSNNLLGEGGYGSVYKGKLAEGRVVAVKQLSETSHQGKQQFAAEIGTISRVQHRNLVKLYGCCLEGNKPLLVYEYLENGSLDKALFGSGRLNLDWPTRFEICLGIARGIAYLHEESSIRIVHRDIKASNILLDANFNPKISDFGLAKLYDDKKT…
Zm00001d002313	Malectin	4	1196.54	1243.97	3005.19	9335.86	6326.42	LRR + Malectin	Plasma membrane	Extracellular	+	-	At1g56120, At1g56130, At1g56140, At1g56145			MRKPRLSVGGGGGLLHGFPSPVLLFLLLLLLSSWRVAAQAQQAPQTDPVEAAAVNAILSKLRLSAPPSWNISGNPCSGAATDDTSIDDNPAFNPAIKCDCSDQNNTLCHVTRLKINTLDAVGPIPEELRNLTHLVKLDFRKNYFYGPLPAFIGELTALESMTVGINALSGPVPKELGNLTNLLSLALGSNNFNGTLPDELGKLTKLRQIYIDSNDFSGSLPSTLSQLKNLSILWASDNNFSGQIPDYLGSLTNLTQLRLQGNSFQGPIPTSLSNLVNLKKLRIGDIVNGSSSLSFIGNLTSLGELVLRNSIISDTLASVDFSNFVNLYLLDLSFNNITGQIPQSILNLTSLSYLFLGNNSLSGSLPATKSPLVTNIDFSYNHISGNFPSWATDKNLQLN…
Zm00001d016242	Malectin	5	130.511	73.4234	48.5278	124.903	105.159	LRR + Malectin + PK	Plasma membrane	Plasma membrane	+	+	At1g53430, At1g53440	NILR2, -		MGADARVRLLLLLLFLLDLGCSNGGGRCSSAQTMLPAQEVEALKGIACKLNKADWDFSVDPCSGLGNWVNVTGLLSSNVTCDCSFNNHTECHVISLELMRQNLSGVLPDEVVNLTYLQNLDLSRNSIQGPIPASWADLPVFNLSLQGNRIFGTLPKELGRMPKLKSIQLEGNQLAGSIPPELGNIISLQRLVLRNCSIYGEIPSYLGQMQYLKVLDISYNDFTGNPPSECQQANVNMVSSFSSSNNNSLQPCLRKNLPCTTRPRHSSLFINCGGKSVVVDGNTYEDDSSQIGTSMYSVSDDKKWAYSSTGDFVGNENADYIARNTSKLNLAYPELYTEARLSPLSLKYYGLCMENGEYTVKLHFAEIVFTEDRTYSSNGKRVFDVFIQGVKVLEDFDIK…
Zm00001d020172	Malectin	2	64.6894	47.6128	73.4971	45.3667	46.4238	Malectin + PK	Plasma membrane	Plasma membrane	-	+	At1g07650	LMK1		MDDNINDDNYIATSASKLAVPNSDLYNKARLSPLSLTYYGLCMLSGSYTVNLHFAEIVFTNDSTYYSLGKRRFNVFIQGRMVLEDFDIEQSSGAAAKPVTKTFQTYVTNHTLEIQFYWAGRGTTGIPYRGSYGPLISAISVTPNFQIPLAVDPPKAGSREKRSSRASIALGIGIPIVAIFTALILGIYCIKKQRKSSMHEELRALDLQIGSFTLRQIKAATRNFDAANKIGEGGFGSVYKGLLSDGTIIAVKQLSSRSKQGNREFVNEIGMISALQHPNLVKLYGCCTEGNQLSLVYEYMENNCLARALFVEQYRLRMDWGTRHKICLGIAKGLAYLHEESAIRIVHRDIKASNILLDKDLNAKISDFGLAKLNEDDHTHISTKVAGTIGYMAPEYAMR…
Zm00001d024291	Malectin	1	64.8502	39.4096	13.773	7.77238	14.2138	LRR + Malectin + PK	Plasma membrane	Plasma membrane	-	+	At1g56120, At1g56130, At1g56140, At1g56145			MNLLTGRRQSDARRKRTQRTPLLRTNEGASEMDMAGRSRCRCSSHGRLLWLLLACSWVAAARGQQTARTDPAEAAALSTILGRWGLKASPGWNISGELCSGVAVDDTDVDNSPTINPSIKCDCSYDDNTVCHITKLRVYGLNVVGQIPAELENLTYLSNLNLMQNYLTGPVPSFIGKFPMQYLSLAINPLSGTLPKELGNLTDLISLGISLNNFTGELPPELGNLSKLEQIYFDSSGFSGPFPSTFSKLKNLKILWASDNDFTGKIPDFIGNLTQLEVLRFQGNSFEGPIPKSLSNLTKLTTLRIGDVVNGSSSLSFISNLTSLDVLILRNCRISDTLATVNFSNLAGLTLLDLSFNNLTGQIPQSILNLDNLGFLFLGNNSLSGSLPDIKSPSLNNLD…
Zm00001d026303	Malectin	1	3199.3	1841.15	830.142	342.512	378.475	LRR + Malectin + PK	Plasma membrane	Plasma membrane	-	+	At1g56120, At1g56130, At1g56140, At1g56145			MGREECDDLGFTVSPLALVQSSLPAHRRPSFWIPTLPHPFFCNAVFSKLGLQVWSPWFKGDPCVGAATDGTSIYADKMNPGIKCDCSDHNNTICHITELKMNKLDVVGPIPEELRNLSHLTTLNLQQNYLTGPLPSFLGELTALQQMSLSGNALSGTIPKELGNLVNLIILSLGTNNLTGSLPSELGNLVKLEHMYIDSAGLSGPIPSSFSKLTRLKTLCASDNDFTGKIPDYIGSWSNLTDLRFQGNSFQGPLPSTLANLVQLTSLRIGDIVTGSSSLAFISNMTSLNLLILRNCRIFGTLALVNFSKFTGLTLLDLSFNNIIGEVPQALLNMNSLTLLFLGNNSLTGGLPSSIGPSIKYLDFSYNYLSGNLPSWASHNLQLNLVANYFVINKSKDSV…
Zm00001d026306	Malectin	4	539.52	378.015	1042.51	4421.46	3014.74	LRR + Malectin + PK	Plasma membrane	Plasma membrane	+	+	At1g56120, At1g56130, At1g56140, At1g56145			MRPGSTPGPSSRRCIHGSAAALPTLLLLLLLLLAASSAQAQQTSRMKTDPVEAAAVNAVFAKLGQAATSAWNISGDPCTGAATDGTNIDNDPTFNPAIKCECSVQNNRTVCHVTKLKIYALNAFGPIPQELQNLTRLTNLNLAQNYLTGPLPSFLGNLTAMQYMSLGINALSGSVPKELGNLVNLVSLGIGSNYLNGSLPSELGNLAKLEQLYIDSAGLSGPLPSSFSRLTRMKTLWASDNDFTGEIPDYIGSWTNLTELRFQGNSFQGPLPATLSNLVQLTSLRIGDIVNGSSSMIFISNMTSLNTLILRNCRISDSLASVNFSQFAKLNLLDLSFNNITGQVPEALVKLNSLSFLFLGNNSLSGSLPSSIGTSLKNLDFSYNQLSGNFPSWTTQNNL…
Zm00001d027337	Malectin	1	1724.32	1626.44	433.037	59.8019	149.7	Malectin + Kinesin	Cytoplasm	Cytoplasm	-	-	At2g22610	MDKIN2		MEGAEALFPGDGCGGDPMDFSWTADGEKHPDPAACASPGRDDEATSASTPVPSPQEMAESMILVPGPRVVMSGLRLADCRSDDCVLFINAGGGAIESCDPCVKVSGDSFFEGGDVIETNESIAEGGDCPFIYHSARYGSFSYKFDGLAPGAYFLDLHFAEILYTCGPKGISMFDVLVQDEKILSQLDVYAVVGGNRALQVRDIRVTVEMNGAVMINFKGVRGSPMVCGICIRKAPLLSANSVTNGNVLCKRCSSDIDVSTTQTRTSKLISKYEKQIEELTSQCTMKSNECYMAWSSVDTTNVELGRLKIELHQKGAEMENLVQTLGRESDQLRNVSRKYKNDKKLWVAAISNLERKIKAMKQEQQLLSLEAHDCANAIPDLSKMIGAVKGLVAQCEDLK…
Zm00001d036318	Malectin	2	308.856	311.757	370.965	355.62	302.404	Malectin	Plasma membrane	Plasma membrane	-	+	At1g56120, At1g56130, At1g56140, At1g56145			MNECNINNLTNRATSFAINCGGKQVEYSDLMPIMFSEDSTDLGGSGFHVNATSHWVVSHVGSDPFNESTGIVNTSDIFETNMQELYQTARTSTSSLWYYVVGLANGNYTVQLFFAEIVITHGPGKRLFDIDIQDQNIRKDFDITKEAGGSRKATNITYEVTVDNSILAIHLYWSGRGTCCIPYEGAYGPLVSAIKVTHSQDPKTSPPQAPHSDSARDDVKRRGVVAGIAALSIAAAVISSSVVYLWWKWVSLVKRPMA
Zm00001d002175	Malectin-like	5	18.8928	12.1077	4.14232	62.1892	228.588	Malectin-like + PK	Plasma membrane	Plasma membrane	-	+	At3g51550	FER		MAHPASSGILGCVTLLCIFSSAAAVGSNATGSGQIRLDCGASSSTSTDADGRSWDSDASSKFAPSLNGVAATASSQDPSLPSPTPYMTARVFTSNYTYSFPVTPGRMFVRLYFYPTIYGGNHAPADAYFGVTAANLTLLQSFNASQTSLSLGVAFFVREYSVNVTEGSLDLTFSPSTHHNGSYAFINGIEIVPTPDLFTTPTPTLSNGGNPDPFPILAGTGFETMYRLNVGGQAISPGGDTGFYRSWVNDVPYIYAAGFGVAFGKDDNLTISYTPTVPNYTAPVDVYATARSMGPNAQINLNYNLTWILPVDAGFYYLLRFHFCEIQYPITKVNQRSFFIYINNQTAQQEMDVIAFSGGIGRTVYTDYVTVTAGSGQTYLWVALHPDLTTRPEYFDAIL…
Zm00001d002282	Malectin-like	3	231.206	362.807	731.977	585.275	534.845	Malectin-like + PK	Plasma membrane	Plasma membrane	+	-	At1g30570	HERK2		MSPFVLAVVSVAFLSLRFLQAHGSGLLLSCGSNSTVDADGRRWIGDITPEGNFTLSSPGLAASLVGKSSSDEIFGPLYSSARFFNAATWYTISVLPGSYCVRLHFFPSTFGNLSANNSVFDVTANDFKLVSKFNASEEIAWRASVSNSVTSAVVKEYFLVVGARGLSIEFDPRPGSFAFVNAIEVMLTPDNLFNDTVSKVGSPVTQLPLGLRGRGVETMYRLNIGGPALKSPSDQYLHRPWYTDEAFMFSTNAAQTVSNASSIVYVSSNESTIAPIDVYETARIMGNNMVVDKRFNVSWRFYVHPNFDYLVRLHFCELVYDKPSQRIFKIYINNKTAAESYDVYARAGGINKAYHEDFFDNSTQQADTLWLQLGPDSMASASGADALLNGVEIFKLSKD…
Zm00001d005894	Malectin-like	4	411.006	238.197	495.038	1900.7	1875.16	Malectin-like + LRR	Plasma membrane	Plasma membrane	+	-	At3g19230	MLLR4		MIPFSVLAGALVLLVGVADALPGYQISCGATSDKVAGNVTWVADGAFIHAGKVAELDSPGVMPMLSSLRYFPPDASSAAKYCYAVPAAMHARYLVRTTYYYGGFDGGGAPPVFDQIIDGTRWSAVDTAGGYARGLATYYEAVVEAAGKELSVCLARSAATAPGRSPFISALEVVPLEESVYSAVNFTAYALSTVARHSFGHNGSIIGYPDDRFNRYWEPYSDGGIPVVESQASVATEAFWNKPPEAVFRRGLTASRDKSLELQWPPAPLPAASYYLALYFQDNRGPSALSWRVFDVAVNGQPFFAGLNVSTAGCMVYGVDWPLSGQTRITLTPALESPVGPLINAAELMMVVPLGGRTHPRDVIGMQELARGFTNPPSDWRGDPCLPQGNSWTGVTCNQ…
Zm00001d008347	Malectin-like							Malectin-like + PK	Plasma membrane	Plasma membrane	-	-	At3g04690, At5g28680	ANX1, ANX2		MAGRAWHPLLVLLLVAGVAAFAESKVYAPADRVLLNCGSTTDGLDSDGRRWAADTNDNTWLTDSGKSSVMMAADRADNGLPSPIPYMTARVFTVEAVYNFTVNPRDRHWVRLHFYPSSYNGLAADSFHFSVSTSTGITLLRNFSVYTYAKALTQAFIIREFSLPPTPAGFLALTFTPTPMGNESYAYVNGIEVISMPDIFVDPAIMVGFADQTVDIASSTLQTMYRLNVGGSYIPPSNDSGLTRHWYDDTPYVYGATQGVTYRAGPHFQIKYPSETAEYAAPPEVYLDTRSMGSDPRLNQNYNLTWTMAVDGNFTYVARLHFCELLLIRANQRAFDIYVNNKTAQADADVIGMTSEKGVPMYKDYAVYMAEEPDGQAMWVALHPSVALRPQFYDAILNG…
Zm00001d010480	Malectin-like	4	269.035	298.179	399.023	522.659	728.316	Malectin-like + LRR	Plasma membrane	Extracellular	+	-	At3g05990	MLLR3	SCW4g	MLPARPLLVAAAVFLLLLPVHVAIVAAQGFRGFSYLLNCGAASPTTDSRGLRWDPDGDYVSAGTPGVVSLSGLINPTLATLRTFPLRYGAKFCYELPVDRNRRYLIRPTFFYGALFASSSAPPPPVFDLIVDGTFWTAVNTTDDALAGAASSYEGVFPASGRNMSFCLGVNPDYTDARPFISALQVIQLDDSVYNATDFPTSAMGLIARTKFGSTGGIERYPNDSFDRYWQPFPDDKHAVSSTQNVTSADFWNLPPPDVFNTAFIAEQDAPLVLQWPPVPLQNDSYYVALYFADTLPDNSRTFDVYINDYLFFKDLNVTSAGLSVFATQWILSGLTTIILKSASPSALPPLINAGEVFGLFPVGRLTYARDVLALESIKKSLQNIPEDWNGDPCMPSGY…
Zm00001d015291	Malectin-like	5	45.6853	28.9921	14.6826	17.1516	63.8359	Malectin-like + LRR + PK	Plasma membrane	Plasma membrane	-	++				MKLSAAVLFFSILLQYCTSSGQPDSRGFISIDCGIPENSTYQDLTSTILYVSDRGFVTSGENRNISAGYISPSLAQRYYTVRAFASGVRNCYTLPSLVAGNKYLVRAAFYYADYDGLSTPPVFDLYLGASLWHEVRFRDAAAINWMDVVAVAPTDFLQVCLVNKGTGTPFISGLDLRPLRSTLYPEANASQSLVMVNANRCNVGPTDKSVVRPTKAHFSGPTSRYPLDPHDRIWLAYGAVPAWTEASATSVVRNYLADPYDAPSAVMQSAATPSDGSVLSFSWDTSDDRSVDASSATYLLVLYFAELQRVSASGELRRQFDIAVDGTAWNREPYSPPYLFADSFSGTVQGQARHSVSLTATRNATLPPLLNAMEVYLVRPVDEAATDPGDAKAMIAIQE…
Zm00001d018789	Malectin-like	3	628.186	1183.3	2500.45	2942.56	1197.45	Malectin-like + PK	Plasma membrane	Plasma membrane	-	+	At1g30570	HERK2		MLIRLLSLTGRLQPTAVDSTGILHYSLKSRDCMRLQGKLIKMRSFPHLLLILALLLVLENVRAQPKPLLINCGSGSSADVDGRTWVGDAHPDGGAGFTVTLAGATATRARKPVDEGGGGGDAAYGELYRTARVFNASSAYRFSVAAGSYFLRLHFSRLFSSNLSGDATAKEAVFDVTANGLRLLSRFSVAGEIYWRNSRTNSTSDVAVKEYLLNVTAARPLEVEFAPDAGSFAFVNAMEVVPVPGNSIFGSVNKVGGVGLKGPFSLGESGVETMYRVCVGGGKIERKEDDPRLWRRWDSDERYIFSMNAAHSIRNTSSISYVSRDGADSVPAPLRLYETARVTEETFVVDRKFNVSWRFGVDPGFEYLVRLHFCELEYGSAEQRRFKIYINGKTAAENY…
Zm00001d020183	Malectin-like	1	272.271	179.104	90.7862	60.9152	68.1457	Malectin-like + LRR + PK	Plasma membrane	Plasma membrane	-	++				MIFLHFTDFQDTQLRQFDILINENQSGPKLTAYNDTWYLTPTHVHTKSYRADDGKYNVTLAATKASVLPPMINALEIYIRVPYESPTTLPQDCKLAQLSFPFPSIGIGCSLSNIVMTTILLCMLVDAIVAIKTEYGLSRNWMGDPCFPIKYAWDGVKCSNASGNTSRITSLDLSNSSLHGTISKNFTLLTALENLDLSYNKLIGSIPDSLPSLPSLRVLNVSGNQLSDESLCKNYTGPLIFSRDFDGSACNKPSPSPSRNKVAIIAISVVVPVLVLIVLLFTYFIWWAKRKSNVQPVPTHGPTRDPEPDNVSGSQKSYGYNMNKTENRQFTYKELEKFTNNFKKFIGQGGFGPVYYGRLEDDTEVAVKMRSESSSHGLDEFLAEVQSLTKVHHRNLVSL…
Zm00001d020184	Malectin-like							Malectin-like	Extracellular	Extracellular	+	-				MIVVPQTTTVNMVLAFLVLLLLFAPVAVSQQGTSLSLHCMHSHIWPRSELDDEPYIVWRTGFLSIDCGLDASYSGYKDKVTGIVYVSDGSYVDAGENHRIAPDLEGSFQGRAQTLRSFPSGQRNCYLLPTVAGTRYLARATFAYGNYDGKNSSALEFDLHLGANYWQTVYPNARSSDVYEAVFVAWAGWAPWCLVNTGHGTPFVSVLELRPLGAELYPLVTPGLVVSMFARINMGGSVSMTRYVFLHYCGTHREVGGPPCFKRTSVSCLLRGLANFFQVSS
Zm00001d020185	Malectin-like	1	361.774	200.545	151.481	129.634	137.029	Malectin-like + LRR + PK	Plasma membrane	Plasma membrane	+	-				MIVVPQTTVNMALAFLVLLLLFAPVAVSQQGFLSIDCGLDADSSGYTDKVTGIVYVSDGSYVDAGENHRIAPDLEGTFEGSSQTLRSFPSGQRNCYALPTVAGTRYLARATFAYGNYDGKNSSALEFDLHLGANYWQTVYPNARSSNAHEAVFVAWAGWTPWCLVNTGRGTPFVSVLELRPLGAALYPLVTPGLVVSTFTRINMGGSVSTTRYPDDPYDRFWWAMDEASPRWVNLSTTRPIQPDTSSYAVPSRVLQTAVAAASNNGTAAALTAMNWQYDTKYSFMIFLHFTDFVHSQIRQFDILINENESGPKFTAYNDTCYLIPTHVHTESYRAAGGKYNVTLAATKASVLPPMLNALEIYVRVPYESPTTLPQDLDAIMAIKTEYGVRKNWMGDPCF…
Zm00001d021566	Malectin-like	2	679.282	961.372	1303.24	1015.17	791.421	Malectin-like + LRR	Cytoplasm	Plasma membrane	+	+	At1g28340	MLLR2		MRWRSPAVLRLQLWLLAVSASLAALGVLAADLSKEPFTIRISCGSFDDVRTEPTNTLWYRDFGYTGGRFANATRPSFIVPPLKTLRYFPLSDGPENCYNINNVPNGHYQVRLFFALLDNPNLDSEPIFDVSVEGTLFSSLLLGWSSDDEKTFAEALVFVQDSSLSVCFHSTGHGDPSILSIEVLQIDDDAYNFGPPREKGTVLRAVKRLKCGSGKPAFDEDLNGIHWGGDRFWLGLQTLSSSSDDQSISSENVIAETLLAPNFYPQGIYQSAIVGTDRQPSLSFEMDVTPNKNYSVWLHFAEIDNGVTAEEQRVFDVLINGDTAFKDIDIIRMTGERFTALVLNKTVAVSGITLKIILQPVKGTRAIINAIEVFEIIPAEKKTLPQEVSALRTLKGSLG…
Zm00001d027436	Malectin-like	4	75.494	66.5984	124.191	240.939	483.817	Malectin-like + PK	Plasma membrane	Plasma membrane	+	+	AT2G23200, AT5G24010	LET1, -		MAVLVLLLLASFLPPTALAAFSPPFSFFLACGAGSTVRDSSARNFTPDDGYLTTKSVPAVTNSNANSAASPLYAAARASSSGAFSYRFSFPNFAGQAAFLVLRLHFFPFTPAPPSAFSISSARFAVSVQLQDTYDVLSSFSPPSAGVVKEFFVPAGGSGDFRVTFTPAAGSAAFVNAVELFPAPEELLWNASVTPVGAAVLDIAAWPRDALETVYRLNVGGPERAAANVSGMAVPTSVNVTWTFPAEPGSNYLVRLHFCDYEVVSAVDGVGIVFNVFVAQAIGTQDFTPKQFETQPNTALYRDYAASAPISRNFTVTVGMSDKSSPGEGGFLNGLEIMKLRPSGSSLAAGSRGSSRRVLIIALSAVLGASVLASAVLCLCFVARRKRRMARPAPLEKES…
Zm00001d027439	Malectin-like	4	336.429	431.016	1310.35	3297.18	2614.1	Malectin-like	Plasma membrane	Plasma membrane	+	+	At4g00300		PCW6g	MAPPPTSRCLALALILIGALCAAAAAARFAPADNHLLACGAAAPAVLPDGRRFVPDSGCASTRLRSSSPSLSSAAPPGSPPPPSSLLASARVFSCRASYDLDVRRRGHHILRLHFYPFVPALAAARFHVGAGGLLLLHNFTASSPVVKEFILPVDSDVLVLTFVPDSGSTAFVNAIELVSAPEELVGDIGTLVTSGGAAQIHELSSQVFETLYRINVAGRKVTPFNDTLWRTWVNDEKFLIDTDSSNYMVWSSSGRIAYPKGSKQMTREVAPDNVYNSARSVRPGVNVTWGFPVPASSRYLVRMHFCDIASKALYELYFNIYVNGDLAVKDFDLSSATGFLAYPYYIDFIVDVKDEGILKLAIGGLKKSRSDEVSGILNALEIMRMNKTSGGMDGDFPI…
Zm00001d028686	Malectin-like	5	132.607	65.5475	42.4562	139.975	390.147	Malectin-like + PK	Plasma membrane	Plasma membrane	+	+	At3g46290, At2g39360, At5g59700	HERK1, CVY1, -		MARAVLDTLLRVAVVLLLLPALVAAAFTPADDYLVLCGTAANATVDGRTFLGDDGLPAAAVLPAPRGSEASASAASGSDDAALYRSARVFAAPSSYTFAIKSPGRHFVRLHFFPFRYGSGDLAADAEFSVSAQGLLLIDGYAPANGTPAVREFSVNVAGGTLAVAFAPAAAGKVAFVNAIEVVSHPDDLFADTAQTVSPMGRYAGLSTQALETVNRVNMGSPKITPRNDTLGRTWLPDEAFLVDSSVTVHRDVAPSKLRWTPGLATPETAPGMVYATATEINTNLVSASTISVQFNMTWKLQAAPGSAYLLRLHFCDIVSKAANGLVFNVYVGGWNVLPDYEISRDTFSVPAVPLYKDFVLSAKDAKGNITVSIGTSTLGNAYPDGVLNGLEIMRMVGS…
Zm00001d029047	Malectin-like	3	1083.53	1739.7	6278.74	11397.7	5394.27	Malectin-like + PK	Plasma membrane	Plasma membrane	-	+	At3g51550	FER	PCW6g	MRAVLLLALLLSACAAAAAQGANSTAFVPRDDIRLDCGAKGQGNDTDGRVWTGDAGSKYAPPDNLASVASASGQDPSVPQVPYLTARVSASPFTYSFPLGPGRKFLRLHFYPANYTDRDAADGLFSVSVAAPGGNLTLLSNFSAYQTAAAITYSYLIREFSVNVSSPTLDLTFTPEKAHPNAYAFVNGIEVVSSPDLFDISTPNMLAGDGNLQPFPIDAGTAMQTMYRLNVGGQAISPSKDTGGYRSWDDDSSYIFGASFGVSYPKDSKVTITYPSNVPEYVAPEDVYGTARSMGPDKNVNMNYNLTWMLEVDAGFMYLIRMHFCEIQYPITKINQRVFNIYINNQTAVKGADVNAWAAVSGATTLIGTPVYQDYVVSTTGLGAMDLWVALHPNPDSKP…
Zm00001d033269	Malectin-like							Malectin-like	Extracellular	Extracellular	-	-				MNFGPKKQHSRALKSKNPSGGCVAAPALVLSSSRRRLDRCAPLPSQGHGRRHRPQSSRTPGHIAGGGRRHRATDLASLQFGTDESSIVWHAGFLSIDCGLDAESSGYTDKVTDIMYISDGSYVDAGENHRIAPDTLHCRLSCVVPVLHCRVQSADCCHARAACSTTSNVFTSLSPQPPVCSSKVARRQLRSSGGHFIHSPKQTTAMSSQPDPQQQGGKFSEI
Zm00001d034089	Malectin-like	4	49.836	37.6007	40.8603	130.467	161.586	Malectin-like + PK	Plasma membrane	Plasma membrane	+	+	AT5G61350	ERU/CAP1		MTRSMLEWKRVPMLIILSILGITSIASTNAIASQKDPFVPQDNYLISCGASSSVQLDDGRTFRSDPESVSFLSTPVDIKIKANNSPTAASSLSPLYLSARVFSDVSTYSFFVSQPGRHWIRLYFLPIPDKQYNLTSATFSVFTDNMVLLHDFSFIANPPNPVLKEYLVVTQGDTLKIIFTPKKDSIAFINAIEVVLAPPTLIPNTTIGLPPLEQFDISNNALQVVYRLNMGGALVTAFNDTLGRTWLPDAPFLKLEAAAQVAWVPPRTIKYPDDKTVTPLIAPANIYSTAQQSASTNTSQARFNITWEMEAEPGFKYLIRLHFCDIISKALNSLYFDVYINGMMGVSNLDLSSLTMGLAVAYYQDFIVDSSSIINSTLLVQVGPSTTDSSNTDAILNGL…
Zm00001d035992	Malectin-like							Malectin-like + PK	Plasma membrane	Plasma membrane	+	-	At4g39110, At2G21480	BUPS1, BUPS2		MTRRGTLPLALLLLLAATTTVSGQGRPVTDSGAQTPPTPSSFTPKDNFLIDCGGTAPLTADGKSYKTDAQANHLLSATDAIRVAADDKADVPSPLYATARGGDVDLASVTFSVVTDDNVLLHSFTPGDKPVMKEYLVNATENHLALKFQPLKGSAAFVNAIEVVNAPDELITDSALAVAPLGEITGLVHDAYQVVYRINVGGPAIGPAKDTLGRRWESDAAYVQSKEAVKDVSVPTSTIKFPDGTSRLVAPALVYASAAKMADADVASPNFNLTWKVDVDASFSYLVRLFFADIVSKATNDLYFDVYLSGRKAVSGLDLSTVAGGELAAPYYKDFVVNSSALAGADGKLSVQVGPMGQDTGRVDALLNGVEVLKMSNSVGSLDGEFGVDGQKADDGSGG…
Zm00001d037544	Malectin-like	4	149.529	95.7815	161.223	588.069	1060.75	Malectin-like + PK	Plasma membrane	Plasma membrane	+	+	At3g46290, At2g39360, At5g59700	HERK1, CVY1, -	SCW4g	MDSTVVGLKLVVLALSVAIWLFGTCCHADFTPADDYLINCGSTVDATVDHRVFVSDTSGAAILTTPTQSTAATTSPNLVSGFEGAMLYQTARIFVVPSSYAFMLKSHGRHFVRLHFFPFKYQSYDLTTATFKVSTQDVVLLDNFTAPSSSSPVFKEYSLNITRDMLILTFVPLGNNTPAFVNAIEVISVPDLITDSVLSLDPVGQYLGLSTQPLQTFYRINVGGPKVTPENDTLWRTWVTDQSSFVNSTPTTLANFPGKLNFQNGLATEEDAPDSVYNTARRLQNSTRSVSNMTWQFDVDARSSYLIRFHLCDIVSKAPYQLLFDVYVDSWSVVKDLDLSDKAFGNLATPYYIDAVLLSSDPSGKLSVSIGPSAVKIAAPDGILNGLEIMKMNISTGSV…
Zm00001d037839	Malectin-like							Malectin-like + PK	Plasma membrane	Plasma membrane	+	+	At3g04690, At5g28680	ANX1, ANX2		MAACRGAFLAVVIAINVVVSASADKYKPTESILVNCGSAKEGKDVDGRKWAADQDKSWLVDAGKSSIMGDADVQDPSLPSPVPYMTARVFTKEAMYNFSVGDADRHWLRLHFYPAAYHGVPAEQFFFSVSTSTGITLLRNFSVYITAKALSQAYIIREFTLPPMADGTLALTFKPTAMNNASYAFVNGIEIISMPDIFADPATMVGLADQTVDTATSSLQTMYRLNVGGSYIAPTNDSGLSRDWYDDTPYLYGAAVGVTYKPDDNAQIKFPSPEAEYAAPASLYLSSRSMGPNPKVNQNYNLTWVFEVDSNFTYVVRLHFCELLLTKVNQRAFDIFVNNKTAQADADVIGWTSGKDVPVYKDYATFMPAGTADKILWIALHPSVSMKPEFYDAVLNGLE…
Zm00001d038484	Malectin-like							Malectin-like	Extracellular	Extracellular or Lysosome/Vacuole	+	-				MRQSKLRAVSARPWLLLLCLALAATAGVMQARAQPNSIGNLMGRAGDRARFISIDCGFPGTTSYVDDATTLPYAPDAAFTDAGENHNVSSEHVTPELPRIYRDVRSFVDGARNCYTLPSTLAVGLNKYLFRAAFMYGNYDGLNRPPVFDLYIGVNLWKTVNLSSSDPAAPVIAEAIVVVPDDFVQVCLVNTGTGTPFISGLELRPLKNSIYPQVNATQGLVLQSRRNFGPTDMTDIIR
Zm00001d038485	Malectin-like	5	5.63707	0.704206	1.59305	10.9172	40.3215	Malectin-like + PK	Plasma membrane	Plasma membrane	-	+			SCW4g	MIIDAIDWLVLSTTEKVRNIYDDLFEVPSKVMQTAITPRDATSSINFYWNSKGSSLGYIPVFHFSEVLQAGAGVVRQFNININGKRFTSHDYYTPRHLESGYVYGTRPYTNQIRYNVSIVKTDTSTLPPIINADEIFIVISTTNVGTDSEDVSAMKAIKAKYQVKKNWMGDPCVAGTFRWDGLTCSYAISDPPKITALYADNPDLCTNAGDSCQTAPQGKSKLVIYYVAVPMALIVVALAVLLCCLLRRRKTRGLADVSVKPRDKTPTSLASMAADEHRLSSLRLENRRFTYEDLEMITDSFKRVIGRGGFGYVYEGFLEDGTQVAVKMRSQSSNQGAKEFLTEVRTAQILTRIHHKNLVSMVGYCKDGVYMALVYEYMSEGSLQEHIAGKRLTWGQRL…
Zm00001d039911	Malectin-like	2	706.815	885.825	939.904	682.327	735.357	Malectin-like + LRR	Cytoplasm	Plasma membrane	-	+	At1g25570	MLLR1		MVLQCHRIASLSVRFRRARFLPRSRTAVRSRIIVRVRRTPSGSSVLPPASPCPLPFPTTIPPPPPSATLKSPSFPTPPQRRNFSTPATPLKSSSLRQGIPPPMRLLPLLLLLLAGAGARASDDPFLSGASANAVWSPPSLPGPGAAANHSYNIDCGGAADFTSALGRRWLADRFFSAGGAAGMVAEPHRFPQPQERTLRFFPPSSAGKSSCYSLPLPPGRYYLRLFSVYDNYDSKLRTPSFDVSAAATLVLSFRSPWPEPAARYGAYSDLIFPSATEPASDLCFYSLSTDAPAVASIEVSPVHPLAYDGATTGADLVLVNYGRVTCGNSLFGPGFTRDADAFSRVWQADVDFRNNDLSYDAITAGGRKVFGSNQPPNYFPTKLYESAVTTGGDAANEIE…
Zm00001d040269	Malectin-like							Malectin-like + PK	Plasma membrane	Plasma membrane	-	-	At3g04690, At5g28680	ANX1, ANX2		MAGRARGPFLVLLLVAGVAATAESKVYAPADRVLLNCGSTTDGLDADGRRWVADTNDNTWLADSGKSSLMMAADKVDTGLPSTIPYMTARVFTVEAVYNFTVNPRDRHWVRLHFYPSSYSGLSAAGFHFSVSTSTGITLLRNFSAYTYAKALSQAYIIREFSFPPTPAGFLTLTFTPTPMGNETYAYVNGIEVISMPDIFVDPAIMVGFADQTVDIASSTLQTMYRLNVGGSYIPPSNDSGLTRHWYDDTPYVYGATQGVTYRAGPHFQIKYPSEIAEYAAPPEVYLGTRSMGSDPRLNQNYNLTWTMAVDGNFTYVARLHFCELLLSRANQRAFDIYVNNKTAQADADVIGMTSEKGVPIYKDYAVYVADDPDGQAMWVALHPSVALRPQFYDAILNG…
Zm00001d041573	Malectin-like							Malectin-like	Extracellular	Extracellular	+	-				MKSTTRSMAPSTVLVLVVILVAVRVHGQFDPQGFISIDCGVAEAYQDPDPDRGLTYVSDAGFVDAGEGLNAPVRPPYVDKGLAQRYLNVRYFPVVTGAGAGGGGAARTRTRSCYTLRPVAQGSRNLVRATFYYGNYDGLNSRPAFDLHLGVSRWATVNVTSNTGVYIFEAVTVSPADFMQVGRSFSSFHIGLAF
Zm00001d041574	Malectin-like							Malectin-like + PK	Plasma membrane	Plasma membrane	-	+				MYQEATATQSLFLLSMSRPSARFYFNRYQFKPDNSFPPFRYPDDSYDRLWQRYGRNAAWTTMNTTKEVDVSNVTGSFDKPSEILQNAATPVANGANRMDFSWSSDPSLEQDANADGNATTYLLILYFAELQRVPSDGLRQFDILINNATGNDGSSQGFTPRYLSAAAVKRTVQGPGQHNVSLVATPAATLPPILNAFEIYAVKPMTEMPTDDENWKGDPCAPRAFAWDGLNCTYPPSIPAQITALNLSSSRLTGAINSSFGDLKSLQRLDLSKNSLSGPVPGFLAQMPSLLFLDLSSNKLSGPVPAALLEKVQNGSLVLRMDNNANLCDNGPSTCDQEKKRNRTLIIATVVPIVVAALLFVAGLLILRRMRNRQDTWMPNNSRFTSPQASSHIFENRKF…
Zm00001d041941	Malectin-like	3	80.6776	300.767	476.909	360.248	513.944	Malectin-like + LRR + PK	Plasma membrane	Plasma membrane	+	+	At2g37050	RGIR1/SIMP1		MASSSSLNPSSYSCFLFVTAAAVFFTASDAQVPGFVSIDCGGSTNYTDELGLQWTGDAGWFPFGQTATISVPSEKRAQYSTLRYFPSPSASSSSSSKHCYTLHVRTRTRYLVRATFLYGNFDSSNVFPEFDLYLGASHWSTIVIYDDSKVVTREAVVLAADPALSVCLSSTGTGTPFISTLELRQLNGSLYYTDYEADAFLALSARINFGAPTADPVRYPDDPYDRIWESDMVRRANYLVDVAAGTVNVSTDRPVFVAGSERPPQKVMQTAVVGSLGELTYRLDLPGFPGNGWAFSYLAEIEEFLVPETRKFKLYIPGLADVSKPTVDIGENAPGKYRLYEPGFPNISLPFVLSLALRKTNDSSKGPILNALEIYKYMHMELGSPDGPVMATLSLALAS…
Zm00001d045515	Malectin-like							Malectin-like + PK	Plasma membrane	Plasma membrane	+	-	At4g39110, At2G21480	BUPS1, BUPS2		MTRRGTLPLALLLLLLAAAAATVSGQGRPVTDSGAQTPPTPSSFTPKDSFLIDCGGTAPLTADGKSYKTDAQANHLLSATDAIRVAADDKADVPSPLYATARVFKEEAVYSFPLTVPGWHFIRLYFFPLKGGDVDLASVTFSVVTDDNVLLHSFTPGDKPVMNEYLVNATENHLALKFQPLSGSAAFVNAIEVVNAPDELVTDSALAVAPLGEITGLVHDAYQVLYRINVGGPAIGPAKDTLGRRWETDAAYVQSKEAVKDVSVPTSTIRFPEGTSRLVAPALVYASAARMADADVGSPNFNLTWKVDVDPSFSYLVRLFFADIVSKATNDLYFDVYIGGRKAVSGLDLSTVAGGELAAPYYKDFVVNSSLLEDGKLSVQVGPMGQDTGRIDALLNGME…
Zm00001d046838	Malectin-like	2	1216.52	1880.93	5314.02	9647.57	1813.25	Malectin-like + PK	Plasma membrane	Plasma membrane	+	+	At3g46290, At2g39360, At5g59700	HERK1, CVY1, -		MMATLGRKKRQAATTFIVLCILSSFYICKAQFTPADSYLVDCGSSKSTMVGQRTFTADGASPVKVSTSQDILAGTSANGVASFDNSALYQTARIFTGPSSYTFPIQKQGRHFVRFYFFPFTYQSYDLSLAKFTVSTQDVLLLSDFQQPDKTAPLFKEYSLNITRDTLVISFKPSNGIAFVNAIEVVSVPDDLITDDAQMVNPVQQYSGLSTQPLETVYRVNMGGPKVTPDNDTLSRTWVTDLKYLLNPSVTKQVNYGKRVNYKKGGGGATQLSAPDIVYGTATELAATNTSNALFNMTWQFDVDAGFSYLVRFHFCDIVSKALNQLYFNAYVGGFYAQNNLDLSAMSDSQLATPIYIDVVLSSNDASSKLSISIGPSVLNNVLPDGILNGLEVMKISTG…
Zm00001d047533	Malectin-like	3	674.358	959.41	3336.28	5278.91	2055.19	Malectin-like + PK	Plasma membrane	Plasma membrane	-	+	At3g51550	FER	PCW6g	MRALLLLALLLATCAAAAAQAANSTAFVPRDDILLDCGAKGQGNDTDGRVWTGDAGSKFAPPDNLASVASASGQDPSVPQVPYLTARVSASPFTYSFPLGPGRKFLRLHFYPANYSNHDAADGLFSVSVAVPGGKLTLLSNFSAYQTAAAITYSYLIREFSVNVSSATLDLTFTPEKGHPNAYAFVNGIEVVSSPDLFDISTPNMVTGDGNLQPFPIDAGTAVQTMYRLNVGGQAISPSKDTGGYRSWDDDTAYIFGAGFGVSYPKDNNVTITYPSNVPEYVAPEDVYGTARSMGPDKNVNMNYNLTWMLQVDAGFMYLIRLHFCEIQYPITKINQRVFSIYINNQTAVKDADVNAWATMSGATTLIGTPVYQDYVVTTSGLGAMDLWIALHPNPDSKP…
Zm00001d048245	Malectin-like							Malectin-like + LRR	Plasma membrane	Extracellular	-	-	At3g19230	MLLR4		MASRIASFPSFLAFVVVTVATLFPSSSSQQQPAAAVPQPRGFYISCGSDKDVQVGSIKWAKDEGFTAVGNASAINKPHLLPLLAALRYFPDATARKYCYQLPVVKGTRYLVRTTYFYGGFDGGKEPPVFDQIVDGTLWSAVNTTDNYRRGMSTYFEMVAQGQGKTMSVCLARRPDTASSPFISALEVIDLADSMYNTTDFSRFTMTTVVRSRFGSKGDIVSYPDDPYNRYWAPFADANPMVESHSSISPDDFWNQPPAKALKAGITTSRGKKLAVQWPTTELPAATYYVALYFQDPRTASPFSWRVFDVAVNGNDFFRGLNASAAGVMVYSSMMQLSGKTEILLTPNETSPVGPLINAGEIYQIVPLGGRTATRDVSSCRSRPVSCAVVAMEDLASSLK…
Zm00001d052306	Malectin-like	3	1051.83	1126.59	1620.54	1365.6	1248.49	Malectin-like + LRR + PK	Plasma membrane	Plasma membrane	+	+	At2g37050	RGIR1/SIMP1		MAAAFSAAILFHLLLLLFSPSAAQPGFISLDCGGARDHTDAIGIQWTSDASFVSGGQAAQLLVQNGLQQTQQQLTTVRYFPADNRKHCYTMNVRNRTRYLVRATFLYGNFDNSNVYPKFDISLGASPWSTIVVDDATTPVVEEAIILAAAPTLSVCLSNASTGQPFISTLELRQFNGSLYYTTDETRFFLGLSARINFGAGSNDSVRYPDDPFDRIWESDSVRRANYLVDVAPGTERISTTKPIFVGTNEEPPEKVMQTAVVGQDGSLNYRLDLEGFPANAWGVSYFAEIEDLAPNETRKFKLEVPGMPALSKPTVDVEENAQGKYRLYEPGYTNLSLPFVFSFGFRKTNDSSKGPILNALEIYKYVQITMGSQDANIMASMVSRYPQEGWAQEGGDPC…
Zm00001d002624	Nictaba	2	399.546	469.374	483.183	258.693	213.994	F-box + PP2	Chloroplast	Cytoplasm	-	-	LOC_Os04g48270			MGAGASSVVAPDGYGRGWGQTSLGDMPESCIAAVLLYLGPAEICQVACLNRTFRDAASADCIWAAKLPSNYRYLAALAAAADDDCACDDAAEGSGRCCSSAAIKKEVYARLCRPTRFDGGTKEFWIDKNKGGFCMSICSKAMSITGRDDRRYWSHLSTEESRFHGVAYLQQIWWLEVGGEIDFCFPAGSYSLFFRLRLGRPHKRMGRRCHGSENIHGWDIKPTRFQLSTSDDQHTTSESHLVNPGRWTLYHVGDFIVSSSDEVTGLKFSMMQIDCTHTKGGLCVDSVCIYPKDLGYEDCVFCQKVL
Zm00001d008645	Nictaba	4	0	0	26.2202	271.357	381.67	PP2	Chloroplast	Cytoplasm or Nucleus	-	-	LOC_Os01g06500		SCW4g	MGLALSRLEEIRTQYRMAAEDGEADSPAPAPVSPTGAAAASGGGTEKKKQADDSSSSSKTTEWVPHKFSEIVGQRRPGEDMFRGIYLPRSDQQPKTKKYWVDGRNANCFMLFPKGFSITWGSDARYWSWRKLTQEEKREIDPEEAKMEMEVAYLKDVCWLEIRAKLEMSHLTPGFTYVVDFVAKLEQNGYGWSEPVDLQINCPGDVDRKPRKESLWKTVDGKKWSYVNVGEVEAAGQNGEMEIAMLRLGGDWKRGLVLRCIKITPKP
Zm00001d008646	Nictaba	3	623.258	674.968	701.385	721.257	674.687	PP2	Chloroplast	Cytoplasm	-	-	LOC_Os01g06500			MGAAPSSDDSSRAGDGRAVASSAASGTGSNSHQAQSKRAPPPHKFHEIVAQEATTAGGGGGTAAAAELEDQACSTGVYLAGKTKKYWVDEKTRCNCFVLFARALSITWGDDPRYWIWHPVRETNDAEIVEAASLQNVCWLEVHGRLELSHLTPGCSYDVAFQVMLTEPAYGWSVPVNLRLRFPDGTAQARKEKLQGRPTKQWLELRAGEVKAPAQPGGAGRSGELEISLFEYDGGLWKKGLLVKGIKIVPKESDY
Zm00001d018451	Nictaba	3	3.39722	56.5288	102.006	207.853	121.617	PP2	Chloroplast	Cytoplasm	-	-	LOC_Os02g56750		PCW6g	MATESAAEIVCRLPEQCVAHAISLTTLGDACHSSAVSPAPFRPAADSDAAWARFLPPDHADDVLARADERPVAAGCCASKEDPFSRLCDCSPVLLEDGATMALVRNVAPVRSIRSGARCFVLSARALSIAWGDDPSCWTWAASPPGSRFPEVAELVDVCWLEISGKLSLSLLSPGTTYAAYLVFTMADDSYGLECHVGMPPPKATVTVSSGGASGTTTTTSSGSKAVTSTTTAEHAICLHHMQGEEEEAAHRRKQQYVRLRRGYGGGRKTTVLTTTREADPDIRCPRRRGDGWAEVEMGEFHVAGDEGDAAVVEVRVQEVDCRRWKRGLVVLGVEIRPKQHTPC
Zm00001d018452	Nictaba	4	888.744	954.243	1493.52	2257.2	2649.63	F-box + PP2	Chloroplast	Cytoplasm	-	-	LOC_Os02g56840, LOC_Os02g56800			MESTAAPAACEIARLPDDLLSAALGRTGPLDACRAAAVSPAFRAAADADAVWSSFLPPDLPPLADGELPADATATKKQLFMRLSDPARPVLLADGLTSMWLDRATVAKCYMLSARKLTIIWGDTPQYWRWIPLTDSRFSECAELQHVCWLEIRGKIPCDMLSRNTTYAAYMVFKMSDESYGLDYPLQEAEVSIGATRSTRQVCLGYVDDDEDGEEVPQNYRSFGAVGTVFRPRIGRRNRRQPPGVHVLHPQTRAGGWMEMEMGEFRNEEGEDGEVSVSLMETRGGNWKRGLTVQGIEIRVKK
Zm00001d021224	Nictaba	4	847.885	666.473	1429.66	3516.42	3845.67	F-box + PP2	Chloroplast	Cytoplasm	-	-	LOC_Os09g35680, AT3G53000	-, PP2-A15		MGAVASSAGGARGGDGTVLGDLPENCVAEVLLRLDPLEICRMARLSRTFRGAASGDGVWESKLPRNYARLLAVAAAGDGEGGQAAASAPGAELLPKKELYARLCRRNRFDGGKKEFWLDKGGGGLCMSISSRALSITGIDDRRYWNFIPSDESRFRTVAYLSQIWWFEVRGEVEFFFPEGTYSLFYRIHLGRPFKRLGRRVYSSEHVHGWDMKPVRFQMSTSDGQHVQSKCYLSDPGIWINHHVGDFVVKDSSRPVNIRFAMIQIDCTHTKGGLCVDSVVVKPQHLSQKKAPWTYV
Zm00001d024256	Nictaba	4	39.0459	27.5765	39.3724	68.719	70.3342	F-box + PP2	Extracellular	Mitochondrion or Cytoplasm	-	-	LOC_Os09g35680, AT3G53000	-, PP2-A15		MFFSRFRFKFQVLHGGGVACCESMPNLIERPSPIDFCVPRDRGGDGTVLGDLLENCVTEVLLRLDPLEICQMARLSRMFRGATSGDGVWESKLLTNYARLLAVAEAGDGEAGQATGSAPEAEPLPKKELYARLCRRNRFDGGKKEFWLDKGGGGLCMSISSRALSITGIDDRRYWNFIPSDESRFRTVAYLSQIWWFEVRGEVEFFFPKSTYNLFYRIHLGRPFKRNQRSSGRDHQVAHRCPWANTHSQ
Zm00001d024621	Nictaba	4	41.4901	28.5491	80.6108	153.118	313.87	F-box + PP2	Chloroplast	Cytoplasm	-	-	LOC_Os08g05480			MEEAAVARTTSETQVGDLPEVCLAQAIARTSPRDACRCAAVSPAFRAAADSDQVWRAFLPEQLEAAEDHLDSRRVSPPSQAAHPAATVRGLSKKDAYLSLCDAAGAVAVDGSGCRVWLERASGATCYALSARRLSLPWDDGEFSWRFTHHPRSRFAEVAELVDCTCLDIYGSLPLAALTPATVYAAFLVYGTAPEGAYRGLSYPDQETAVAVGGRVVARHAVCLRPDDAEARKFRGRGAGEEARRPSLRADGWEEMEMGRLRTPPVESGGGGGDVCVVQASFEVLGWYPKRGLVVEGIEFRALHDAS
Zm00001d026078	Nictaba	4	8.72356	5.14715	9.31263	23.8024	28.0813	F-box + PP2	Chloroplast	Cytoplasm or Nucleus	-	-	LOC_Os04g48270			MGVGASSVGAAEGCGRGWGPRHTSLGDMPESCVAAVLLYLDPAEICQVACLNRAFRGAASADCIWAAKLPANHRYLAALAAAADDDDCSCGCDGVAAEGSCSTVAIKKELYARLCRPTPFDGGRNDRRYWSDLSTEESRFHSVAYLRQIWWLEVDGEIDFCFPAGSYSLFFRLHLGRPRTRRARRRGGSDNDIHGWDIRPARFRLSTSDHQQHTTASEAHARLASPGRWVLYHVGDFAVSSPDEVTELRFSMMQIDCTHTKGGLCVDSVCIYPKRHGGYEEDCVFCQKI
Zm00001d027361	Nictaba	5	81.0658	60.5064	42.4222	263.023	390.771	F-box + PP2	Chloroplast	Cytoplasm or Nucleus	-	-	LOC_Os03g02550		SCW4g	MGAGASGLAGAEPGGKVARGAGLGDLPELCTAEVLLRLGAPDICRLARLNLAFRGAAGADFVWEAKLPGNYARLLRFVDEAEEEGGSGRDWSAVGRKDVFARLARPVPFDGGKREFWLEKNEGGICMALSSKALVITGIDDRRYWINMPTSESRFHSTAYLQQIWWFEVVGEVDFCFPAGTAYSLYFRLHLGKSSTRFGRRVCSSEQVHGWDKKPVRFQLSTSDGQHAVSQCYLDEPGRWILYHVGDFDAPPSSGQPTRLKFSLAQIDCTHTKGGLCVDSVLVYPKGFQPERVVRARK
Zm00001d029673	Nictaba	3	693.951	887.925	1929.15	3114.82	1876.39	F-box + PP2	Chloroplast	Plasma membrane or Nucleus	-	-	LOC_Os10g37830		PCW6g	MGAWVSVLLGMDGAAAAGPAAVGLGDLPELCAAQVLLRLDPPEICRLAQVNHAFRGAAGADFVWEAKLPENYNYLMEFVGSGDEGKRRRRRAGKKEIYARLARPVPFGDGKKEFWLDKNKGMICMALSSKALVITGIDDRRYWQHMPTSESRFQSVAYLQQIWWFEVVGEVDFCFPVGTYSLYFRVHLGKFYRRFGRRQCTSEHVHGWDKKPVRFQLSTSDGQQALSQCYLEEPGSWVLYHAGDFVASKPDQLMKLKFSMAQIDCTHTKGGLCIDSVLIYPKGKGFHQERVVRSQK
Zm00001d032785	Nictaba	3	11.8759	12.9312	26.6881	20.169	27.4134	PP2	Chloroplast	Mitochondrion	-	-	LOC_Os08g05480			VAAWLVVRFGEVAELMDCSYLDIYGRLPAVVLTRATSYAAYLVYGIAEGHRGLSFPDQEAAGAGAVIPYGGGGVHVPRLRDDGWSEVEMGRLCTIEAAEHEAPGEDVVASFEVVGSYPKRGLILEGIEFRKLQ
Zm00001d032787	Nictaba	3	51.8851	100.385	152.019	129.446	233.63	F-box + PP2	Chloroplast	Cytoplasm	-	-	LOC_Os08g05480			MGEEETRAGDLPEPCLAHAIALTSPRDACRCAAVSPAFRAAADSDYVWGRFVPEDHRRAIALHLHDAGRDRGPRKDAYLALCDGGGGGVPVDVDGDGWCRLWLDQASGAKCYALSARRLSLPWEDGDFCWRWAPHARSRFGEVAELMDCSYLDIYGRLPVAVLTRATSYAAYLVYGIAEGHRGLSFPDQEAAVSLGGRVPAESHHRRSVCLRPDEAEARKFWGAGAVIPYGVGGVHVPRLRDDGWWEVEMGRLRTVEAGEHEAPGEDVVASFEVVGSYPKRGLILEGIEFRKLQ
Zm00001d035636	Nictaba	2	20.9287	12.826	20.2524	41.8399	22.4079	F-box + PP2	Nucleus	Nucleus	-	-	LOC_Os09g35680, AT3G53000	-, PP2-A15		MRGVLPQEISAAISPLRPAAATSRNLGRDSAYPSRRRHNRPQPRERDPQIERPSPIDFCAPRARGGDGTVLSDLLENCVAEVLLRLDPLEICRMARLSRMFRGAASGDGVWESKLLTNYARLLAVAAAGDGEAGQAVGSAPKAEPLPKKELYARLCRRNRFDDGKKEFWLDKGGGGLCMSISSRALSITGIDDRRYWNFIPSDESRFRTVAYLSQIWWFEVRGEVEFFFPESTYSLFYRIHLGRPFKRNQRSSGRDHQVAY
Zm00001d051447	Nictaba	4	295.656	407.855	546.209	760.814	1507.86	F-box + PP2	Chloroplast	Cytoplasm	-	-	LOC_Os02g45320			MGTGSSILGADGEWGETSLGDMPESCVAAVLLYLDPPEICQVARLNSAFRGAASADCVWAAKLPANYRYLAALAAAADDEGCGDGDASGKRLTKKEIYARLCRSTFFDAGRKEFWILKNKGALCMSISSKAMTITGIDDRRYWSHLATEESRFHTVAYLQQIWWLEVDGELEFCFPAGAYSLFFHLHLGRPYRRMGRWLCGTEHVHGWDVTPTRFQLTTSDEQQATSEYYLHLHEQGGWKLYHVGDFVISNSDEPMKLKFSMMQIDCTHMKGGLCVDSVFIYPKGYKPEKANIVCT
Zm00001d051936	Nictaba	3	5.8563	129.238	197.326	260.398	126.828	F-box + PP2	Chloroplast	Cytoplasm	-	-	LOC_Os02g56750			MAESAIYRLPEECVAYAISLTTPGDACHSSAVSPAFRAAADSDAVWARFLPPDHADILARADDPGAVTAGCASKKELFSRLCDSPVLLDGATMSFGLERRSGAKCFMLSARALSRKNDPSRWTWAASPPGSRFPEVVKLQDVCWLEISGKLSLSLLSPGTTYAAHLVFAIADDSYGLECHVGMPALKATVTVTVSGKTTMAEHDICLHHMQGEAEAAAHRRTQQYVRLRRGYGGGGKATVLTTTREADPDIRCPRRRGDGWAEVEVGEFAVAGDEGDAADVEVTVQEDSLRWKRGLVVLGVDIRPKQHTPTPC
Zm00001d053171	Nictaba	4	0.902647	0.281682	0.27006	59.9321	310.207	LRR + PP2	Nucleus	Cytoplasm or Nucleus	-	-	AT1G80110	PP2-B11		MHFPMCSSLPQLGQLANLKKLYLSRMPKIRRLGRELSDNTGGLRNLQIFTLEYMENLEEWCTTMTSATGQQQQEEFMFPALQELTIYHCPLLTMRPCPPRSIDYWEVRASSGAAQLLLQKDGMMQSVADYMGLQCPFAYTSELHGFFLESPMGTNSCILPARSLSILWGQDDRYWRLNSIPESRFALSMELIAVWWLEIEGWVPFEFLSTDTSYDIFLVYKLADEHDGLRWGESYVAVDGVHTTDGVVSFVDEDAVRVDRVAYPVTRSEGWMELWLGEFYNKYVDREVKVSVWEKTDTYAKIGLIIEGMEIRKKSGSIS
Zm00001d053172	Nictaba	5	31.0423	15.0083	23.8619	68.9569	225.988	F-box + PP2	Chloroplast	Nucleus	-	-	LOC_Os02g56840, LOC_Os02g56800			MEGIQQLPADVLVSVISRAAAGPRDACIAATVSPAFRAAADSDTVWSRFLPADLAPLVYPTPPPRSKKELFLRLSETHALVEDGLMSAWLDRETGAKSYMIAARAMAIIWVDTPDYWRWIVREDSREAWVARFIGGGFKLASSGIRGELHGFSTCAELLAVCWLDISGCMPCRMLSGDTRYAAYLVFKMADDCFGLDSPLQEASVSVGEGGTSTAHWIRLQSYHVGDEENGVTEEGAPPRLPHERPDGWMEVELGDWYNHGGDDDLVVRASVKEARFGGNWKKGLIVQGLEIRPKN
Zm00001d003281	Ricin B	4	1.97869	0.536257	0.271738	60.693	134.052	GH5 + ricin B	Extracellular	Extracellular	-	-	N/A		SCW4g	MGCSCPPLADAACLALLLLALSLACRHHHGCAAATLSTASRWVLDESGSRVKLACVNWPSHLEPVLAEGLGKRPVGAIAADVAAMGFNCVRFTWPTFLVTDASYSDLTVAQSFQRLNLTESLAGIRVNNPGVVDLKLIDAFKASLSAVVSSLGEHNLMVILDNHLSKPGWCCSNTDGSGFFGDTYFDPDVWVDGLTKMATMFAGVPNVVGMSLRNELRGPRQNVNDWYKYMQRGAEAVHAANPRVLVILSGLSFDNDLAFLNSRPVNLSFTGKVAFEVHWYSFSNGPEWSSGNANQACARITAGITRRAFYLLDRGWPVILSEFGVDNRGVNTNDNRYYGCAAAAAADLDLDWALWALQGSYYLREGVLGLDEVYGVLDWAWCRPRNDTALRRVQALQR…
Zm00001d005454	Ricin B	1	287.407	488.859	385.805	62.5144	106.365	RIP/Ricin B/Ricin B	Extracellular	Extracellular	-	-	N/A			MVHLAVPWLCLASWAALLPALASGNVGAAAPILRADYIKLNFSTASATPDKYKSFIASVRAGLVSKAGGNSSGIPVLVDEDDPLALESFLNITLVNKAGRSVSLKMDVSRAYFVAYVAGQRSCLLKRSGRTFSSAICYYGGPWGTSSAPVTRPAAAAGDGEDPGVAAWRARDLDEAISSLFLFPTGNATEEELRRGVAACDMMVASAATFPYVERRMSAGMWDSNGVANDPSLRGLQARWPWLSAAVQQSYQGAFAAPVPVQRSNGKWMRVDNVRSAVPLVSFLEHGSCNRTRGAPALLIRSVVQEPDEDMQPGGGARATTAACGLPAEPTVRLVGPEGRCVDVPYGYYYNGNQVQLWSCKSTSAVNQLWTLKRDGTIRSNGKCLTSSGDAAGARAVVD…
Zm00001d025696	Ricin B	5	86.1757	105.231	54.5121	93.6107	265.37	GH5 + Ricin B	Extracellular	Extracellular	+	-	N/A			MAASTSPLLLALLLLPALTAAASLLALPLSTASRWIVGVDGRRVKLACANWASHLEPAAAEGLARRPVSDIAARVAAMGFNCVRLTWPTYLVTNATLASLPLRWSLERLGMLESVAGVRVNNPALLDLPLIDVFREVVSSLARKGIMVILDNQMTTPGWCCSRTDGNGFFGDVYFDPNEWLKGLSAMATMFNNTKYVVGMSLRNELRGPKQNVSLWYRYMQLGAEAVHAANPNVLVILSGLDFDNTLSFLFKEKVRLSFSGKLVYEQHWYGFSDGGNWETQNQNDVCGMVVDFIWAKGLFLLQHGWPLFFSEFGFDMSGTHIGDNRYLTCFLSVAAEMDLDWAIWALQGSYYIREGILAYDESYGLLTWDWCTARNPSFIKRINSLQSAFQGPGLPNTQ…
			*TGR - total gene reads					*Pfam/IPR/PTHR id numbers of domains are presented in the sheet titled "Domain IDs"				*TM - transmembrane domain	¹ - data from Nazipova et al., 2022			*repredicted amino acid sequences are highlighted by bold font
													² - data from Kozlova et al., 2020
													³ - homologs were identified using BLAST
													N/A - phylogenetic analysis didn't performed in this study

## Sheet: Domain IDs
Lectin domains	ID (Pfam, InterPro, PANTHER)
Agglutinin	PF07468
Calreticulin	PF00262
Lectin_C	PF00059
Ricin B-like	IPR040249/PTHR31257
Gal_lectin	PF02140
Gal-bind_lectin	PF00337
B_lectin	PF01453
Chitin_Bind_1	PF00187
Jacalin	PF01419
Lectin_legB	PF00139
LysM	PF01476
Malectin	PF11721
Malectin-like	PF12819
PP2	PF14299
Ricin B	PF00652
Additional domains	ID (Pfam, InterPro, PANTHER)
Aerolysin	cd20216
GH35	PF01301
GHD	PF17834
GT31	PF01762
DUF223	PF02721
S_locus	PF00954
EGF	IPR000742
PAN	PF08276
GH19	PF00182
Dirigent	PF03018
PK	PF00069
LisH	IPR006594
CLTH	PF10607
F-box	PF00646
LRR	IPR032675
Kinesin	PF00225
GH5	PF00150
RIP	PF00161
